# Supplementary material for: Prototyping for public health in a local context: a streamlined evaluation of a community-based weight management programme (Momenta), Northumberland, UK
Source: PubMed Central journal article supplement (PMC6830698; doi:10.1136/bmjopen-2019-029718), 2019-10-31
Supplement: bmjopen-2019-029718.draft_revisions.pdf [file bmjopen-2019-029718.draft_revisions.pdf]

# BMJ Open

BMJ Open is committed to open peer review. As part of this commitment we make the peer review history of every article we publish publicly available.

When an article is published we post the peer reviewers' comments and the authors' responses online. We also post the versions of the paper that were used during peer review. These are the versions that the peer review comments apply to.

The versions of the paper that follow are the versions that were submitted during the peer review process. They are not the versions of record or the final published versions. They should not be cited or distributed as the published version of this manuscript.

BMJ Open is an open access journal and the full, final, typeset and author-corrected version of record of the manuscript is available on our site with no access controls, subscription charges or pay-per-view fees (<http://bmjopen.bmj.com>).

If you have any questions on BMJ Open's open peer review process please email [info.bmjopen@bmj.com](mailto:info.bmjopen@bmj.com)

# BMJ Open

**Prototyping for public health in a local context: a streamlined implementation and effectiveness evaluation of a community-based weight management programme (Momenta), Northumberland, UK**

|                               |                                                                                                                                                                                                                                                                                                                                                                                                                                                                                                                                                                                                                                                                                                                                                                                                                                                                                   |
|-------------------------------|-----------------------------------------------------------------------------------------------------------------------------------------------------------------------------------------------------------------------------------------------------------------------------------------------------------------------------------------------------------------------------------------------------------------------------------------------------------------------------------------------------------------------------------------------------------------------------------------------------------------------------------------------------------------------------------------------------------------------------------------------------------------------------------------------------------------------------------------------------------------------------------|
| Journal:                      | <i>BMJ Open</i>                                                                                                                                                                                                                                                                                                                                                                                                                                                                                                                                                                                                                                                                                                                                                                                                                                                                   |
| Manuscript ID                 | bmjopen-2019-029718                                                                                                                                                                                                                                                                                                                                                                                                                                                                                                                                                                                                                                                                                                                                                                                                                                                               |
| Article Type:                 | Research                                                                                                                                                                                                                                                                                                                                                                                                                                                                                                                                                                                                                                                                                                                                                                                                                                                                          |
| Date Submitted by the Author: | 07-Feb-2019                                                                                                                                                                                                                                                                                                                                                                                                                                                                                                                                                                                                                                                                                                                                                                                                                                                                       |
| Complete List of Authors:     | Dodd-Reynolds, Caroline; Durham University, Department of Sport and Exercise Sciences; Durham University, Wolfson Research Institute for Health and Wellbeing Physical Activity Special Interest Group<br>Nevens, Lisa; Northumbria Healthcare NHS Foundation Trust Community Services Business Unit<br>Oliver, Emily; Durham University, Wolfson Research Institute for Health and Wellbeing Physical Activity Special Interest Group; Durham University, Department of Sport and Exercise Sciences,<br>Finch, Tracy; Northumbria University, Nursing, Midwifery and Health Lake, Amelia; Department of Science, School of Science, Engineering and Design, Teesside University<br>Hanson, Coral; Edinburgh Napier University, School of Health and Social Care; Durham University, Wolfson Research Institute for Health and Wellbeing Physical Activity Special Interest Group |
| Keywords:                     | public health evaluation, prototyping, implementation, community weight management, NUTRITION & DIETETICS, exercise referral                                                                                                                                                                                                                                                                                                                                                                                                                                                                                                                                                                                                                                                                                                                                                      |
|                               |                                                                                                                                                                                                                                                                                                                                                                                                                                                                                                                                                                                                                                                                                                                                                                                                                                                                                   |

SCHOLARONE™  
Manuscripts

1  
2  
3 1 Prototyping for public health in a local context: a streamlined implementation and  
4  
5 2 effectiveness evaluation of a community-based weight management programme (Momenta),  
6  
7 3 Northumberland, UK  
8  
9

10  
11 4  
12  
13 5 Caroline J Dodd-Reynolds<sup>1,2</sup> (corresponding author\*), Lisa Nevens<sup>3</sup>, Emily J Oliver<sup>1,2</sup>, Tracy  
14  
15 6 Finch<sup>4</sup>, Amelia A Lake<sup>5,6</sup> Coral L Hanson<sup>7</sup>  
16  
17  
18  
19

20 8 <sup>1</sup>Department of Sport and Exercise Sciences, Durham University, Durham, DH1 3HN, UK\*.  
21  
22 9 Email: [caroline.dodd-reynolds@durham.ac.uk](mailto:caroline.dodd-reynolds@durham.ac.uk) Tel: +44(0)191 3342000  
23

24 10 <sup>2</sup>Wolfson Research Institute for Health and Wellbeing Physical Activity Special Interest  
25  
26 11 Group, Durham University, Durham, UK.  
27  
28

29 12 <sup>3</sup>Northumbria Healthcare NHS Foundation Trust, Northumberland, UK.  
30

31 13 <sup>4</sup>Department of Nursing, Midwifery and Health, Northumbria University, Newcastle upon  
32  
33 14 Tyne, UK  
34  
35

36 15 <sup>5</sup>Department of Science, School of Science, Engineering and Design, Teesside University,  
37  
38 16 Teesside, UK  
39

40 17 <sup>6</sup>Fuse – UKCRC Centre for Translational Research in Public Health, UK  
41

42 18 <sup>7</sup>School of Health and Social Care, Edinburgh Napier University, Edinburgh, UK  
43  
44  
45  
46  
47  
48

49 20 **Word count:** 4214  
50

51 21  
52 22 **Keywords:** Public health evaluation, prototyping, implementation, community weight  
53  
54 23 management, diet, exercise referral  
55  
56  
57  
58  
59 25  
60

## 1 ABSTRACT

2 **Objectives** Stakeholder co-production in design of public health programmes may reduce the  
3 ‘implementation gap’ but is time-consuming and costly. Prototyping, iterative refining  
4 relevant to delivery context, offers a potential solution. This evaluation explored prototyping  
5 in the implementation and effectiveness of a referral-based, 12-week weight-management  
6 programme, ‘Momenta’, in Northumberland, UK.

7 **Design** Anonymised service evaluation data examined physiological and psychological  
8 outcomes at 12 and 52 weeks. Qualitative interviews with referring healthcare professionals  
9 and focus groups with service users explored implementation and prototyping.

10 **Setting** Two leisure centres in northeast England.

11 **Participants** Overweight and obese individuals (n=182) referred by healthcare professionals.  
12 Referring professionals (n=5) participated in individual interviews and service users (n=13)  
13 in focus groups.

14 **Interventions** Three 12-week interventions: Momenta (n=59), Momenta plus Fitness  
15 membership (Momenta-Fitness) (n=58), and Fitness membership only (n=65).

16 **Primary and secondary outcome measures** Primary outcome: weight loss. Secondary  
17 outcomes: uptake, adherence, mental wellbeing, anxiety, depression, and implementation and  
18 prototyping effectiveness.

19 **Results** 12-week weight loss [median kg, (interquartile range)] was observed for Momenta -  
20 2.9 (-5.0 to -2.0) and Momenta-Fitness -2.9 (-5.1 to -1.6)  $p < 0.001$ , but not Fitness-only. 52-  
21 week follow-up suggested persistence of weight loss for Momenta-Fitness. Uptake and 12-  
22 week adherence were higher for Momenta (84.7%, 45.8%) and Momenta-Fitness (93.1%,

1  
2  
3 1 60.3%) versus Fitness-only (75.4%, 24.6%). 12-week mental wellbeing, anxiety and  
4  
5 2 depression improved in Momenta and Momenta-Fitness, remaining at 52 weeks ( $p < 0.05$ ).  
6  
7 3 Prototyping did not detrimentally impact on participants' experiences and enabled important  
8  
9 4 refinements such as broadening inclusion criteria. Implementation gaps were revealed around  
10  
11 5 the referral process and practitioner knowledge.  
12  
13  
14

15  
16 6 **Conclusions** Momenta was effective for weight loss, particularly combined with fitness  
17  
18 7 membership. Prototyping aided implementation and appropriate in evaluations providing 1.  
19  
20 8 A strong theoretical and empirical underpinning of the intervention; 2. use of co-production  
21  
22 9 methods to allow iterative refinement during implementation.  
23  
24  
25

26 10

27  
28 1129  
30  
31  
32 1233  
34  
35 1336  
37  
38 1439  
40  
41 1542  
43  
44 1645  
46  
47 1748  
49  
50 1851  
52  
53 1954  
55  
56 2057  
58  
59  
60 21

## 1 ARTICLE SUMMARY

### 3 Strengths and limitations of this study

- 5 • This study advances understanding about whether prototyping is a cost-effective and  
6 time-efficient approach to design and implementation of public health programmes.
- 8 • This mixed methods evaluation provides insight into the implementation and  
9 effectiveness for an ‘off-the-shelf’ weight management programme, in a local context.
- 11 • Embedding stakeholders’ views in the entire evaluation process allowed for ongoing,  
12 iterative refinement.
- 14 • A limitation to the quantitative component is the small sample size.
- 16 • Qualitative interviews and focus groups can only provide information about what  
17 participants recall about their experiences, meaning that there is a potential for recall  
18 bias.

## 1 INTRODUCTION

2  
3  
4  
5  
6  
7  
8 Failure to implement effective public health interventions when programmes are scaled up or  
9  
10 transferred across contexts is widely reported.<sup>1</sup> Proposed approaches attempting to address  
11  
12 this implementation gap include; effectiveness-implementation hybrid designs,<sup>2</sup> linking  
13  
14 action to theory and models based on theory,<sup>3</sup> and application of the replicating effective  
15  
16 programmes framework.<sup>4</sup> Common to all is advocacy of a developmental process reflecting  
17  
18 on existing knowledge about the target population and planned programme prior to delivery.  
19  
20 Engagement of service users is encouraged. Although this increases the likelihood of services  
21  
22 meeting all stakeholder's needs, it is costly in both time and financial resources. Resulting  
23  
24 well-designed services will be tailored to a problem that may have changed during the time  
25  
26 spent developing the intervention. Additionally, public access is delayed. Resource-pressured  
27  
28 public health services must therefore consider pragmatic alternatives to service design and  
29  
30 implementation. In this paper, we explore a novel evaluation approach to these  
31  
32 implementation challenges, focusing on a problem high on the public health agenda: obesity  
33  
34 and overweight.  
35  
36  
37  
38  
39  
40  
41  
42  
43 Targeting elevated weight status is a public health priority, obesity being a recognised risk  
44  
45 factor for many physical and psychological health outcomes.<sup>5-9</sup> In England for example,  
46  
47 obesity and overweight are associated with 30,000 deaths and an estimated National Health  
48  
49 Service cost of £6.1 billion per annum.<sup>10</sup> Globally, countries with higher income inequalities  
50  
51 tend to have higher rates of obesity.<sup>11</sup> Excess weight is also associated with widening social  
52  
53 and economic deprivation,<sup>12</sup> with calls to improve the effectiveness of behaviour change  
54  
55 interventions for low-income groups.<sup>13</sup> There is a clear need for effective public health  
56  
57 programmes that can be refined according to local need. This evaluation focuses on  
58  
59  
60

1 Northumberland, in northeast England. Northumberland is one of the lowest ranked counties  
2 in England by Gross Value Added per capita (£16,140).<sup>14</sup> Unemployment is higher (5.5%  
3 versus 4.8%) than the England average<sup>15</sup> and Northumberland public health spend per person  
4 is £53, compared to a £59 national average.<sup>16</sup> 63.8% of adults are classified as having excess  
5 weight, higher than the national average of 61.3%.<sup>17</sup>

6  
7 The need for innovation within public health has been postulated, shifting away from the  
8 traditional linear pre-conceived and evidence-based model.<sup>18</sup> One alternative is prototyping  
9 where projects test innovations iteratively, with ongoing refinement considering the interplay  
10 between a programme and its delivery context.<sup>19</sup> A small number of studies to date, for  
11 example in drug prevention<sup>20</sup> and web-based support of long-term weight loss<sup>21</sup> have  
12 demonstrated efficiencies when including elements of prototyping within programme  
13 development. Such an approach seems particularly well-suited to weight management, where  
14 there are many examples of ‘good’ practice, or effectiveness, but no clear consensus on ‘best’  
15 practice at service-delivery level. There is also limited understanding of how tailoring  
16 programmes or interventions to local contexts may impact on effectiveness. This evaluation  
17 has particular value therefore in testing a prototyping approach for a weight management  
18 programme delivered at local authority level. Specifically, we take an ‘off-the-shelf’  
19 programme, ‘Momenta’<sup>22</sup> and evaluate its implementation and effectiveness in a challenging  
20 context. Emergent findings will facilitate understanding not only of whether the programme  
21 is adaptable, demonstrating promise for ‘scaling up’, but more importantly whether the  
22 prototyping approach can be a resource-effective way of informing and refining public health  
23 delivery.



## 1           2 3           1   **METHODS** 4 5           2 6 7

### 8           3   **The prototyping process: local context and evaluation design** 9 10          4

11  
12          5   A local authority health needs assessment identified a gap in provision for a lifestyle-based  
13  
14          6   weight management referral programme within Northumberland. Overweight and obese  
15  
16          7   adults were at the time eligible for referral to the Northumberland exercise referral scheme  
17  
18          8   (ERS). Although the ERS doubled as a weight management intervention, previous evaluation  
19  
20          9   demonstrated modest weight loss<sup>23</sup> and a body mass index (BMI) >30 kg/m<sup>2</sup> was negatively  
21  
22          10   associated with adherence.<sup>24</sup> Thus ‘Momenta’ was commissioned for local adaptation and  
23  
24          11   delivery. Momenta is an evidence-based, outcome-driven behavioural programme designed  
25  
26          12   to be delivered by fitness professionals in a leisure environment.<sup>22</sup> Developed by the MEND  
27  
28          13   childhood weight management programme<sup>25</sup> designers, this 12-week programme aims to  
29  
30          14   facilitate weight loss by engaging participants in 12 key behaviours broadly encompassing  
31  
32          15   psychology, diet and physical activity. It was offered free to service users.  
33  
34  
35  
36  
37  
38  
39

40          17   The local Leisure Trust was commissioned to deliver a pilot Momenta programme.  
41  
42          18   Stakeholder meetings were held with Leisure Trust managers, delivery staff and Momenta  
43  
44          19   programme developers. Members of the evaluation team (CDR, EO) provided guidance on  
45  
46          20   evaluation design and light touch advice about tools to explore effectiveness. The evaluation  
47  
48          21   was thus co-produced to ensure a robust framework, whilst meeting strategic local needs. For  
49  
50          22   example, commissioners were concerned about meeting recruitment targets for an existing  
51  
52          23   tier three weight management service for pre-bariatric patients and Momenta was initially  
53  
54          24   commissioned for overweight patients only (BMI 25.0-29.9 kg/m<sup>2</sup>), although this was later  
55  
56          25   amended. Furthermore, commissioners were keen to consider accessibility of provision and  
57  
58  
59  
60

1 wished to explore the effect of offering free gym, swimming and fitness class membership.

2 The evaluation was designed to accommodate this.

3

4 The pilot programme was delivered at two leisure sites situated within the 20% and 50%  
5 most deprived neighbourhoods in the country. Six General Practice (GP) surgeries, identified  
6 as the best referrers to the existing ERS, were asked to refer suitable patients to Momenta.

7 The programme manager and the public health improvement manager (LN) attended practice  
8 meetings to articulate referral criteria and disseminate advertising materials. Attendance  
9 varied from two to all practice staff, meaning that in some surgeries knowledge of the  
10 programme was reliant on dissemination by those who attended.

11

12 A mixed methods evaluation was agreed between the evaluation team and commissioners.

13 Quantitative and qualitative components were conducted concurrently and had equal status.<sup>26</sup>

14

### 15 **Quantitative evaluation component**

16

17 Programme providers allocated service users into one of three comparison groups:

18 a) Combined Momenta plus fitness membership (Momenta-Fitness);

19 b) Momenta;

20 c) Fitness membership (Fitness-only).

21 Referrals by healthcare professionals (HCPs) were made via a standardised form to the  
22 appropriate leisure site. Due to maximum recommended Momenta group size, referrals were  
23 split into delivery cohorts of 15, with groups rolling through March 2015 to April 2016.

24

1 Outcome measures included anthropometric measurements to determine weight change.

2

3 Secondary well-being outcome measures were of specific interest to commissioners. Prior to

4

5 programme commencement the Leisure Trust, in conjunction with the Momenta programme

6

7 designer and members of the evaluation team, held a training day for delivery staff. Although

8

9 staff were qualified to deliver Momenta, extra bespoke training (including role-play scenarios

10

11 and problem-solving discussions) was delivered by the clinical psychologist who designed

12

13 Momenta. The evaluation team (CDR, CH) trained delivery staff in international standard

14

15 anthropometric techniques<sup>27</sup> and familiarised them with other evaluation measures.

16

17

18

19

20

21

22

23

24 Age, gender and postcode (for index of multiple deprivation, IMD) were recorded by

25

26 referring HCPs on the referral form. Employment status, level of education, cohort wave and

27

28 programme group were recorded by leisure staff, who also measured height, weight, and

29

30 waist circumference at baseline and programme end. Measures were taken in at least

31

32 duplicate, using standardised tools. Body mass index was calculated and classified according

33

34 to WHO guidelines.<sup>28</sup> The Warwick-Edinburgh Mental Well-being Scale,<sup>29</sup> and the Hospital

35

36 Anxiety and Depression Scale<sup>30</sup> were administered at each time-point. Attendance at

37

38 Momenta and leisure centre usage was monitored via swipe-card tracking. 52 weeks after

39

40 commencing the programme, participants were invited to attend a follow-up session, where

41

42 leisure staff repeated physiological and psychological measures. Programme providers

43

44 collected and collated quantitative data and provided an anonymised dataset to the evaluation

45

46 team for analysis.

47

48

49

50

51

52

53

54

55

56

57

58

59

60

## 1 **Qualitative evaluation component**

2

3 Implementation effectiveness for the referral process was explored through semi-structured  
4 interviews with referring HCPs (undertaken at referring surgeries) and focus groups with  
5 service users (in leisure centres). All were conducted by LN during March-July 2015, as part  
6 of her Public Health Masters degree (which contained qualitative methods training), mentored  
7 by TF, an experienced qualitative researcher. Questions are included in supplementary file 1.  
8 Data were audio-recorded. Results are reported using the Consolidated criteria for Reporting  
9 Qualitative research guidelines<sup>31</sup>

10

11 Practice managers from all six referring surgeries were sent an invitation for staff to take part.  
12 Individual correspondence was sent to those agreeing. Interviews aimed to explore HCPs'  
13 referral experiences; raising weight issues; assessing readiness to change; marketing and  
14 referral materials; and the referral process. Interview questions were pilot tested with public  
15 health colleagues to assess timing and ensure validity. One question (*Thinking about after*  
16 *you referred the patient, what happened next?*) was omitted after piloting as it was realised  
17 HCPs would not have had patient feedback at that point. Interviews lasted on average 26  
18 minutes and were transcribed verbatim. Data were analysed following each interview, with  
19 developing themes considered to determine whether questions required refinement. Initial  
20 themes generated from the first two interviews did not change and thus questions remained  
21 constant, although prompts were added.

22

23 During the initial assessment session for the first wave of referrals, all ( $n = 39$ ) were invited  
24 to participate in a series of focus groups at programme-end to explore experiences. Emphasis  
25 was placed on the referral process, initial expectations and experiences of participation; how

1 weight issues were raised by HCPs; time from referral to initial assessment; and facilitators  
2 and barriers to taking part. Focus groups lasted between 26 and 44 minutes.

#### 3 4 **Patient and public involvement**

5  
6 Commissioners, deliverers and service users were involved in the iterative evaluation.

#### 7 8 **Data analyses**

9  
10 The anonymised quantitative dataset was analysed using PSAW Statistics V.22. Descriptive  
11 statistics were calculated for age, gender, IMD, employment status, initial BMI, leisure site,  
12 level of education, and uptake and adherence. Distribution and normality of measures  
13 (weight, BMI, waist circumference, psychological wellbeing and attendance) were assessed  
14 using Shapiro Wilk tests and median and interquartile range (IQR) scores calculated for each  
15 group at baseline and 12 weeks (attendance, 12 weeks only). Kruskal-Wallis H tests were  
16 used to determine between group differences at baseline and 12 weeks for viable data.  
17 Wilcoxon-signed rank tests examined differences between baseline and 12-week scores. Data  
18 available at 52 weeks ( $n = 37$ ) were analysed separately.

19  
20 Qualitative data were audio-recorded and transcribed by LN using a thematic process.<sup>32</sup> Data  
21 were organised according to concepts, key themes and developing categories. Data coding  
22 was discussed with TF, allowing comparison of data interpretation and subsequent coding  
23 refinement. Evolving key themes were refined through the analysis process and subsequent  
24 cross-sectional thematic labelling of data, thus generating deeper understanding. Where

1 possible, key phrases or expressions identified from interviews and focus groups were  
2 retained within coding and thematic labelling. A public health colleague helped to verify  
3 interpretations of the data and appropriateness of codes applied. Once initial interviews were  
4 coded this framework was applied to remaining data. Notes taken during focus groups helped  
5 to contextualise when developing themes and included information about dynamics within  
6 groups, such as influence, disagreement, humour and peer exposure.

## 8 **RESULTS**

10 Between December 2014 and March 2016, the programme received 182 referrals and was  
11 delivered in four cohorts across leisure sites. Due to initial low levels of recruitment, the first  
12 cohort did not start until March 2015. Referrals were mainly female (83%) and 30.6% lived  
13 in the 20% most deprived areas (table 1).

**Table 1. Demographic characteristics of referrals (n=165)**

|                                                       | Median   | IQR      |
|-------------------------------------------------------|----------|----------|
| <b>Age (years)</b>                                    | 53       | 24       |
| <b>Gender (n=167)</b>                                 | <b>n</b> | <b>%</b> |
| Male                                                  | 29       | 17.4%    |
| Female                                                | 138      | 82.6%    |
| <b>Initial BMI category (kg/m<sup>2</sup>, n=150)</b> |          |          |
| 25.0-29.9                                             | 40       | 26.7%    |
| 30.0-34.9                                             | 73       | 48.6%    |
| 35.0-39.9                                             | 27       | 18.0%    |
| ≥40.0                                                 | 10       | 6.7%     |
| <b>Leisure site (n=170)</b>                           |          |          |
| Leisure site 1 (IMD quintile 2)                       | 80       | 44.7%    |
| Leisure site 2 (IMD quintile 3)                       | 99       | 55.3%    |
| <b>Index of multiple deprivation (n=170)</b>          |          |          |
| 20% most deprived                                     | 52       | 30.6%    |
| 21-40%                                                | 41       | 24.1%    |
| 41-60%                                                | 20       | 11.8%    |
| 61-80%                                                | 20       | 11.8%    |
| 20% least deprived                                    | 37       | 21.6%    |
| <b>Employment status (n=123)</b>                      |          |          |
| Employed full time                                    | 37       | 30.1%    |
| Employed part time                                    | 24       | 19.5%    |
| Retired                                               | 51       | 41.5%    |
| Claiming incapacity benefit                           | 5        | 4.1%     |
| Claiming job seekers allowance                        | 6        | 4.9%     |
| <b>Level of education (n=127)</b>                     |          |          |
| Primary                                               | 15       | 11.8%    |
| Secondary (O level/GCSE)                              | 35       | 27.6%    |
| Secondary (A level)                                   | 26       | 20.5%    |
| Further education (HND)                               | 25       | 19.7%    |
| Bachelors or equivalent                               | 21       | 16.5%    |
| Masters or equivalent                                 | 5        | 3.9%     |

**Programme Effectiveness**

Of all referrals, 153 (84%) attended the baseline measurement session and 78 (51% of those who started) attended the 12-week measurement session. Uptake and adherence varied by programme group (table 2).

**Table 2. Programme uptake, adherence and attendance.**

| <b>Uptake and adherence</b>        | <b>Momenta plus fitness</b> |                     | <b>Momenta only</b> |                     | <b>Fitness only</b> |                     |
|------------------------------------|-----------------------------|---------------------|---------------------|---------------------|---------------------|---------------------|
| Number referred                    |                             | 58                  |                     | 59                  |                     | 65                  |
| Uptake* (n, %)                     |                             | 54 (93.1%)          |                     | 50 (84.7%)          |                     | 49 (75.4%)          |
| Uptake Adherence** (n, %)          |                             | 35 (64.8%)          |                     | 27 (54.0%)          |                     | 16 (32.7%)          |
| Overall adherence*** (n, %)        |                             | 58 (60.3%)          |                     | 59 (45.8%)          |                     | 65 (24.6%)          |
| <b>Momenta session attendance</b>  | <b>Momenta plus fitness</b> |                     | <b>Momenta only</b> |                     | <b>Fitness only</b> |                     |
|                                    | <b>n</b>                    | <b>Median (IQR)</b> | <b>n</b>            | <b>Median (IQR)</b> |                     |                     |
| Uptake                             | 54                          | 9.0 (7.3)           | 50                  | 9.0 (8.0)           |                     |                     |
| Dropouts                           | 19                          | 3.0 (3.0)           | 23                  | 3.0 (5.0)           |                     | N/A                 |
| Adherers                           | 35                          | 10.0 (2.0)          | 27                  | 11.0 (1.3)          |                     |                     |
| <b>Exercise session attendance</b> | <b>Momenta plus fitness</b> |                     | <b>Momenta only</b> |                     | <b>Fitness only</b> |                     |
|                                    | <b>n</b>                    | <b>Median (IQR)</b> | <b>n</b>            | <b>Median (IQR)</b> | <b>n</b>            | <b>Median (IQR)</b> |
| Uptake                             | 54                          | 7.0 (16.3)          | 50                  | 0.0 (4.5)           | 49                  | 0.0 (1.5)           |
| Dropouts                           | 19                          | 0.0 (1.0)           | 23                  | 0.0 (0.0)           | 33                  | 0.0 (0.0)           |
| Adherers                           | 35                          | 10.0 (14.0)         | 26                  | 0.0 (5.0)           | 16                  | 4.5 (18.0)          |

*Uptake\** participant attended baseline assessment; *Uptake adherence\*\** % of participants who attended the baseline assessment who also attended the 12-week assessment; *Overall adherence\*\*\** % of all those referred who attended both baseline and 12-week assessment

Physiological and psychological data were not normally distributed. No significant differences were found between programme groups either at baseline or at 12 weeks, for any measures. Significant within-group differences between baseline and 12 weeks were evident for weight, BMI and waist circumference for Momenta-Fitness, and Momenta (Table 3). Follow-up analysis at 52-weeks (available sub-sample) showed changes were maintained for Momenta-Fitness ( $n = 18$ ) only.



1 **Table 3. Weight, BMI and waist circumference change.**

| End of programme results                             | Median (IQR)<br>Baseline | Median (IQR)<br>12 weeks | z      | p      | Median (IQR)<br>Change |
|------------------------------------------------------|--------------------------|--------------------------|--------|--------|------------------------|
| <b>Weight (kg)</b>                                   |                          |                          |        |        |                        |
| Momenta plus fitness (n=35)                          | 88.9 (80.5 - 100.0)      | 88.0 (77.2 - 95.8)       | -4.531 | <0.001 | -2.9 (-5.1 - -1.6)     |
| Momenta only (n=26)                                  | 87.8 (74.5 - 77.0)       | 83.3 (74.5 - 92.5)       | -4.344 | <0.001 | -2.9 (-5.0 - -2.0)     |
| Fitness only (n=15)                                  | 76.2 (71.6 - 86.9)       | 76.6 (70.4 - 84.6)       | -0.879 | 0.379  | 0.0 (-3.2 - 1.0)       |
| <b>BMI (kg/m<sup>2</sup>)</b>                        |                          |                          |        |        |                        |
| Momenta plus fitness (n=35)                          | 32.0 (30.3 - 35.7)       | 31.3 (29.2 - 35.3)       | -4.494 | <0.001 | -1.1 (-1.9 - -0.6)     |
| Momenta only (n=26)                                  | 32.0 (30.0 - 34.5)       | 31.3 (28.6 - 33.6)       | -4.356 | <0.001 | -1.2 (-1.6 - -0.8)     |
| Fitness only (n=14)                                  | 29.2 (27.3 - 33.0)       | 29.7 (27.0 - 33.3)       | -0.454 | 0.650  | 0.1 (-1.2 - +0.4)      |
| <b>Waist circumference (cm)</b>                      |                          |                          |        |        |                        |
| Momenta plus fitness (n=35)                          | 106.0 (98.0 - 115.0)     | 99.0 (93.0 - 110.0)      | -4.996 | <0.001 | -7.0 (-9.5 - -5.0)     |
| Momenta only (n=25)                                  | 108.0 (99.5 - 114.5)     | 101.0 (93.8 - 111.5)     | -4.166 | <0.001 | -5.0 (-7.3 - -2.5)     |
| Fitness only (n=11)                                  | 90.0 (87.0 - 95.0)       | 91.0 (90.0 - 96.0)       | 0.358  | 0.650  | 1.0 (-3.0 - 3.0)       |
| 52-week follow-up                                    | Median (IQR)<br>Baseline | Median (IQR)<br>52 weeks | z      | p      | Median (IQR)<br>Change |
| <b>Weight (kg)</b>                                   |                          |                          |        |        |                        |
| Momenta plus fitness (n=18)                          | 95.2 (87.1 - 101.4)      | 91.4 (82.7 - 95.9)       | -3.006 | <0.001 | -4.8 (-6.2 - -1.5)     |
| Momenta only (n=16)                                  | 84.7 (72.3 - 95.2)       | 82.7 (73.2 - 94.6)       | -1.533 | 0.120  | -0.7 (-7.6 - 0.8)      |
| <b>BMI (kg/m<sup>2</sup>)</b>                        |                          |                          |        |        |                        |
| Momenta plus fitness (n=18)                          | 32.0 (30.49 - 35.1)      | 30.8 (28.7 - 34.0)       | -3.157 | <0.05  | -1.7 (-2.0 - -0.6)     |
| Momenta only (n=16)                                  | 31.7 (29.3 - 33.9)       | 31.1 (26.7 - 33.6)       | -1.603 | 0.109  | -0.3 (-2.3 - 0.3)      |
| <b>Waist circumference (cm)</b>                      |                          |                          |        |        |                        |
| Momenta plus fitness (n=18)                          | 109.0 (101.0 - 114.8)    | 100.5 (94.8 - 107.3)     | -3.221 | <0.001 | -6.0 (-13.3 - -1.75)   |
| Momenta only (n=16)                                  | 106.0 (94.5 - 115.8)     | 103.5 (98.5 - 113.3)     | -0.780 | 0.938  | -2.5 (-9.0 - -10.0)    |
| * Fitness only n=3 therefore no 52-week calculations |                          |                          |        |        |                        |

3  
4  
5 Significant improvement in mental wellbeing, and reductions in depression and anxiety, were  
6 evident between baseline and 12 weeks for Momenta-Fitness, and Momenta (Table 4). The  
7 magnitude of change was relatively small but functionally and clinically meaningful. For  
8 example, the median value for anxiety for Momenta dropped from a moderate symptomology  
9 to a not symptomatic classification. 52-week sub-sample analysis showed that significant  
10 improvements for wellbeing and depression were maintained for Momenta-Fitness (n=18),  
11 and wellbeing and anxiety for Momenta (n=16).

**Table 4. Wellbeing, anxiety and depression measures change.**

| End of programme results      | Median (IQR)<br>Baseline | Median (IQR)<br>12 weeks | z      | p      | Median (IQR)<br>Change |
|-------------------------------|--------------------------|--------------------------|--------|--------|------------------------|
| <b>Mental wellbeing scale</b> |                          |                          |        |        |                        |
| Momenta plus fitness (n=29)   | 46.0 (40.0 - 51.5)       | 53.0 (40.0 - 51.5)       | 3.810  | <0.001 | 5.0 (1.5 - 12.0)       |
| Momenta only (n=23)           | 49.0 (39.0 - 58.0)       | 55.0 (51.0 - 63.0)       | 2.818  | <0.05  | 6.0 (-1.0 - 10.0)      |
| Fitness only (n=13)           | 47.0 (40.5 - 59.5)       | 46.0 (42.0 - 63.5)       | 0.157  | 0.875  | 0.0 (-4.0 - 5.0)       |
| <b>Anxiety scale</b>          |                          |                          |        |        |                        |
| Momenta plus fitness (n=28)   | 5.5 (4.0 - 9.8)          | 4.5 (2.0 - 7.0)          | -3.027 | <0.001 | -1.0 (-3.0 - 1.0)      |
| Momenta only (n=23)           | 8.0 (6.0 - 10.0)         | 4.0 (2.5 - 9.0)          | -2.329 | <0.05  | -1.0 (-3.0 - 0.0)      |
| Fitness only (n=13)           | 8.0 (3.5 - 10.0)         | 6.0 (4.0 - 9.0)          | -0.499 | 0.618  | -1.0 (-2.0 - 2.0)      |
| <b>Depression scale</b>       |                          |                          |        |        |                        |
| Momenta plus fitness (n=28)   | 5.5 (3.3 - 8.0)          | 2.0 (1.0 - 6.0)          | -3.214 | <0.05  | -2.5 (-4.8 - -0.3)     |
| Momenta only (n=23)           | 5.0 (3.0 - 7.5)          | 3.0 (1.0 - 5.0)          | -3.049 | <0.05  | -1.0 (-4.5 - 1.0)      |
| Fitness only (n=13)           | 4.0 (2.0 - 8.5)          | 2.0 (2.0 - 7.0)          | -1.226 | 0.220  | -2.0 (-4.5 - 0.0)      |
| 52-week follow-up             | Median (IQR)<br>Baseline | Median (IQR)<br>52 weeks | z      | p      | Median (IQR)<br>Change |
| <b>Mental wellbeing scale</b> |                          |                          |        |        |                        |
| Momenta plus fitness (n=15)   | 44.0 (39.0 - 52.0)       | 55.0 (48.0 - 59.0)       | 2.984  | <0.05  | 5.0 (3.0 - 15.0)       |
| Momenta only (n=13)           | 58.0 (47.5 - 59.0)       | 56.0 (54.0 - 63.5)       | 2.282  | <0.05  | 4.0 (0.5 - 6.5)        |
| <b>Anxiety scale</b>          |                          |                          |        |        |                        |
| Momenta plus fitness (n=15)   | 6.0 (2.0 - 10.0)         | 2.0 (1.0 - 7.0)          | -1.785 | 0.074  | -3.0 (-6.0 - 0.0)      |
| Momenta only (n=15)           | 7.0 (4.0 - 9.0)          | 5.0 (1.0 - 8.0)          | -1.990 | <0.05  | -3.0 (-4.0 - 0.0)      |
| <b>Depression scale</b>       |                          |                          |        |        |                        |
| Momenta plus fitness (n=15)   | 7.0 (3.3 - 11.3)         | 3.5 (1.0 - 6.0)          | -2.908 | <0.05  | -3.5 (-6.3 - -0.8)     |
| Momenta only (n=15)           | 4.0 (1.0 - 6.0)          | 3.0 (1.0 - 4.0)          | -0.762 | 0.446  | 0.0 (-2.0 - 1.0)       |

\* Fitness only n=3 therefore no 52-week calculations

Overall, the results suggested those who participated in the two groups incorporating Momenta, had enhanced physical and psychological health indicators from baseline, whereas those who had only free fitness membership did not. There is some evidence that the combination of Momenta and fitness membership produces the best outcomes at 52 weeks.

## 1 **Implementation effectiveness: reflections from referring healthcare professionals**

2

3 Five face-to-face semi-structured interviews took place with HCPs across five referring  
4 surgeries: two GPs, two Practice Nurses and one Health Care Assistant. HCPs perceived that  
5 four key themes influenced the effectiveness of programme implementation: (i) difficulties  
6 raising weight with patients, (ii) how gender affected patient engagement, (iii) availability of  
7 information and resources, and (iv) additional barriers constraining programme promotion.

8

9 Raising the issue of weight with patients:

10

11 Concerns about raising weight may have contributed to slow recruitment, with nurses and  
12 healthcare assistants expressing unease, *'not really up to me... well I talk about it if they want*  
13 *to.... Better if they [patients] bring it up.'* (Interview 2, Healthcare Assistant). GPs seemed  
14 more comfortable raising weight with patients, but with the caveat that this is easier in the  
15 context of a longer-term GP/patient relationship.

16 *'the people I see I've known for a very long time... it's the rapport you have...if I'd*  
17 *never met anyone before and they came in for a sore throat I'm not going to say*  
18 *you're fat...If there was someone I'd known for a long time and it seemed*  
19 *relevant...I'd mention it.'* (Interview 5, GP).

20

21 Gender and engagement in the referral process:

22

23 Gender was highlighted as influencing the referral process, women being more likely than  
24 men to seek support for weight. This may help explain the low rate of referral for males  
25 (17%):

26

1  
2  
3 1 *'More women talk about it...men don't really talk about weight...I do mention weight*  
4  
5 2 *to men if I'm doing a well man [sic] but it doesn't come up really...it's a woman*  
6  
7 3 *thing...'* (Interview 3, Practice Nurse).  
8  
9

10 4  
11  
12  
13 5 Availability of information and resources:  
14  
15 6

16  
17 7 Several interviewees highlighted training needs around programme information and  
18  
19 8 resources, (e.g., additional programme information would help to engage patients). For  
20  
21 9 example, the GPs both discussed the longstanding ERS and stated they needed to become  
22  
23 10 more familiar with Momenta, as they had with the ERS:  
24  
25

26 11 *'when we get opportunities to do things in the practice we normally discuss it, let*  
27  
28 12 *everyone know where appropriate forms and information is and it's in your*  
29  
30 13 *head...that didn't happen with this and I don't know why that was.'* (Interview 5, GP).  
31  
32  
33  
34  
35

36 15 All HCPs interviewed felt the referral leaflet (provided by programme providers) was  
37  
38 16 important in the process, either as a tool to promote the intervention or to convey information  
39  
40 17 to patients:  
41  
42

43 18 *'The leaflet was good, bright...explained the programme and patients like taking a*  
44  
45 19 *leaflet away.'* (Interview 3, Practice Nurse)  
46  
47  
48  
49  
50  
51  
52  
53  
54  
55  
56  
57  
58  
59  
60

1  
2  
3 1 Additional Barriers to Engagement:  
4  
5

6 2  
7  
8

9 3 Several sub-themes highlighted additional barriers to the referral process. The most  
10  
11 4 prominent sub-themes were around initial BMI referral criteria (25.0-29.9 kg/m<sup>2</sup>) and delayed  
12  
13 programme start. Both implementation factors were beyond the control of the referrers, but  
14 5  
15 consequently amended through iterative refinement during the prototyping process following  
16 6  
17 early data analysis. Both were reported by practice nurses as exacerbating each other:  
18 7

19 8 *'we were referring but then it didn't start so people were not sure what was*  
20  
21 9 *happening [pause]...Think it was more people were needed to start...but you know if*  
22  
23 10 *the BMI was higher then there would have been more.'* (Interview 3, Practice Nurse).  
24  
25  
26  
27

28 11  
29  
30 12 In one case, a decision was taken to relax the referral criteria, *'...31.5 [kg/m<sup>2</sup>]...was just*  
31  
32 13 *outside so I just referred him.'* (Interview 4, GP).  
33  
34  
35

36  
37 15 Programme location was perceived by HCPs to overcome an existing barrier to the tier three  
38  
39 16 weight management programme, as Momenta was *'round the corner for people,'* as opposed  
40  
41 17 to *'a bit far away at the hospital.'* Cost barriers were also discussed, both with reference to  
42  
43 18 the patient, *'in this sort of area...cost..., if you've got to pay it's a barrier.'* (Interview 4, GP),  
44  
45 19 and to expected targets from Clinical Commissioning Groups (CCG),  
46  
47

48 20 *'we are constantly told by the CCG that we must keep down on numbers and that if*  
49  
50 21 *there are costs attached to this referral that would definitely impact... and that would*  
51  
52 22 *be for all practices.'* (Interview 5, GP)  
53  
54  
55

56 23  
57  
58  
59 24  
60

## 1 **Implementation effectiveness: reflections from participants**

2  
3  
4  
5  
6  
7  
8 3 Three focus groups allowed programme participant voices to be heard: three females and one  
9  
10 4 male from Momenta (focus group 1), three males and three females from Momenta-Fitness  
11  
12 5 (focus group 2) and three females (one of whom emailed her views separately) from Fitness-  
13  
14 6 only. Across the groups, 12 participants reported having lost weight and one reported weight  
15  
16 7 gain. Three themes developed: (i) outcomes of the programme, (ii) facilitators and barriers to  
17  
18 8 engagement, and (iii) raising the issues of weight with HCPs.  
19  
20  
21  
22  
23  
24

25 10 Outcomes of the programme:  
26  
27  
28  
29  
30  
31  
32  
33  
34  
35  
36  
37  
38  
39  
40  
41  
42  
43  
44  
45  
46  
47  
48  
49  
50  
51  
52  
53  
54  
55  
56  
57  
58  
59  
60

12 Focus group findings aligned closely with quantitative outcomes in terms of the physical and  
13 psychological benefits of participation: *'[I've] lost a good bit of weight. It's been very*  
14 *positive for me... I'm feeling a lot more active...'* (Momenta-Fitness, Participant 5).  
15 Participants reported a sense of weight loss achievement, increased physical activity levels,  
16 and positive mood states. In addition, elements of the Momenta programme were perceived  
17 as facilitating engagement, including the *'group feeling... I looked forward to it,'* (Momenta-  
18 Fitness, Participant 4), the *'information that we got every week... so very well planned.'*  
19 (Momenta-Fitness, Participant 3) and the ongoing support e.g., *'she phoned me the other day*  
20 *to see if I was coming,'* (Momenta-Fitness, Participant 4). Momenta participants reflected  
21 back on, and identified and discussed lifestyle factors that related to their initial weight gain  
22 (e.g., *'I did the usual thing... I started eating toffees,'* Momenta-Fitness, Participant 5),  
23 demonstrating both self-awareness and an openness to discussing the topic.  
24  
25

1  
2  
3 1 Facilitators and barriers to engagement:  
4

5 2

6  
7  
8 3 One participant reported being initially excluded but later allowed to take part, and others  
9  
10 4 raised concerns that the initial BMI threshold for referral was too low, '*was a little bit high,*  
11  
12 5 *BMI...managed to get it down... [and then] the doctor put us forward,*' (Momenta, Participant  
13  
14 6 2). Data also indicated the importance of subsidised access, particularly important in the  
15  
16 7 context of a deprived region such as this, e.g., '*I also joined Weight Watchers for short period*  
17  
18 8 *of time but found the classes too expensive,*' (Fitness-only, Participant 3, emailed response).  
19  
20  
21  
22 9

23  
24 10 Raising the issue of weight with HCPs:  
25

26 11

27  
28 12 Some data did suggest implementation was problematic, however, this focused exclusively  
29  
30 13 on the referral process. Participants overwhelmingly felt that they had opened the  
31  
32 14 conversation about weight, as opposed to discussions being initiated by HCPs (e.g., '*my*  
33  
34 15 *glucose levels were quite high but nobody ever said that I was overweight,*' Momenta-  
35  
36 16 Fitness, Participant 4). In addition, participants perceived limitations in HCPs' knowledge of  
37  
38 17 intervention components ('*she [nurse] didn't know anything about it,*' Fitness-only,  
39  
40 18 Participant 1), something with potential to impact on likelihood of referral, and  
41  
42 19 participants' expectations of programme success.  
43  
44  
45  
46  
47 20

## 48 49 21 **DISCUSSION**

50  
51 22

52  
53 23 We explored 'prototyping', as a cost-effective and time-efficient approach to public health  
54  
55 24 evaluation, via an 'off-the-shelf' weight management programme implemented in a local  
56  
57 25 context of mixed and high deprivation. Participation in Momenta and Momenta-Fitness  
58  
59  
60

1 resulted in 12-week weight loss for those who completed the programme. Free fitness  
2 membership without the weight-management programme was poorly engaged with and did  
3 not result in weight change. After a year, weight reductions equivalent to 5% were  
4 maintained for Momenta-Fitness, greater than seen for some commercial weight-loss  
5 programmes,<sup>33</sup> although a limited sample was available for follow-up analyses. Providing  
6 free access to fitness facilities alongside the behaviour change programme was potentially a  
7 factor, allowing for continuous and self-driven behaviour change<sup>34</sup> and sustaining optimal  
8 changes in adiposity over 12 months.<sup>35</sup> Swipe card monitoring during the initial 12-week  
9 period indicated that fitness sessions were accessed an average 10 occasions for this group,  
10 whereas no access was apparent for Momenta, despite Momenta sessions being held in  
11 leisure centres. This may be important for community providers making decisions about  
12 delivery location. Both Momenta groups reported improved wellbeing, and reduced anxiety  
13 and depression at 12-weeks suggesting that the behavioural intervention drives this effect.  
14 This is consistent with previous work reporting co-varying changes in weight loss,  
15 depression, and quality of life in weight management services.<sup>36</sup> It is unclear whether the  
16 primary mechanism was weight loss, or the wider social benefits of participation. Both were  
17 valued in the qualitative data. Maintenance of significant improvements in wellbeing for  
18 these groups at 52 weeks is important given previously evidenced associations between poor  
19 mental health, and obesity and overweight status.<sup>37</sup>

20  
21 Experiences of both referrers and referrals highlighted that HCPs needed to be better-  
22 informed and more confident raising weight-related conversations. Whilst patient-led action  
23 is desirable, staff reluctance to raise weight issues may mean that opportunities for  
24 engagement of less knowledgeable or motivated patients will be missed. The problematic  
25 positioning of GPs within obesity care has been highlighted previously,<sup>38</sup> with a range of



1 strategies to change HCPs' behaviour resulting in little or no change to patients' weight. A  
2 practical training need is highlighted for those working at the patient-practitioner interface,  
3 however communication with patients about weight may well be hindered by the 'stigma'  
4 attached to obesity.<sup>39</sup> This has wider implications for patient outcomes and requires further  
5 exploration through the implementation process. Additionally, HPCs need better  
6 understanding of referral-based public health programmes offered. Despite efforts of  
7 programme and public health managers, awareness was reportedly low for some referring  
8 professionals. We suggest consideration of resource-efficient ways to signpost both HPCs  
9 and patients themselves as part of the implementation process.

10  
11 This programme was delivered across a social gradient in a region with low health indices  
12 and areas of high deprivation. Some issues in relation to inequalities and service access for  
13 future community-based weight management programmes were highlighted. Only 17% of  
14 referrals to Momenta were males. Gender bias in weight management referral has been  
15 reported elsewhere,<sup>40-41</sup> and interviews showed that practitioners struggled to raise the topic  
16 of weight with male patients. Alternative referral strategies have been employed in other  
17 settings in an attempt to overcome this.<sup>42</sup> Marketing in other community spaces, or targeted  
18 postal referrals could be explored in future implementation. The initial decision to restrict  
19 referral to overweight-only substantially impacted on referral rates, with HCPs and referrals  
20 indicating they felt limited until this restriction was reversed. Had this continued, worsening  
21 health inequalities may have been an unintended consequence, something to be actively  
22 avoided within public health programmes<sup>43</sup>. The roles of, and interactions between, those  
23 operating in the 'system' (i.e. the context within which the intervention operates) must be  
24 considered at the point of implementation to minimise any impact from unintended  
25 consequences.<sup>44</sup> In practical terms, this may be through continued dialogue with

1 commissioners, referring professionals and referrals themselves, something which  
2  
3  
4  
5  
6 2 prototyping evaluation allows.  
7  
8 3  
9  
10 4 Given that no systematic problems emerged with participants' experiences of the programme  
11  
12 5 itself, our findings lend support to a streamlined approach to involvement of all stakeholders  
13  
14 6 in programme implementation. Furthermore, the prototyping evaluation format allowed for  
15  
16 7 changes following programme commencement, suggesting that this route offers opportunities  
17  
18 8 for off-the-shelf programmes to be pragmatically moulded to local context, in real-time.  
19  
20 9 However, emergence of some negative experiences of referral suggests that prototyping can  
21  
22 10 be problematic without networks or channels for ensuring key outcomes are widely  
23  
24 11 communicated to relevant actors. Overall, the evaluation demonstrated that a balance is  
25  
26 12 needed to allow quick and efficient adaptation of off-the-shelf programmes, but with focused  
27  
28 13 professional user engagement in the early stages of development. Some confidence in the  
29  
30 14 approach was derived from the strong theoretical grounding of the programme; we would  
31  
32 15 consider it unwise to adopt such a streamlined approach otherwise. The prototyping  
33  
34 16 approach had particular utility given that project resources were limited and meant that issues  
35  
36 17 were identified and acted upon rapidly. While the programme may have progressed similarly  
37  
38 18 without this, prototyping provided a greater structure for, and confidence in, on-going  
39  
40 19 refinements. This was achieved via the support provided by academics, public health  
41  
42 20 practitioners and providers. Fundamentally, adopting a prototyping approach enabled the  
43  
44 21 delivery of a new service to an in-need population, alongside the generation of initial  
45  
46 22 evidence of local effectiveness. A minimum of 1 kg weight-loss at 3 months, and 0.7 kg at  
47  
48 23 12-months have been suggested as thresholds to influence decisions over commissioning of  
49  
50 24 weight-loss services.<sup>33</sup> Momenta met and indeed exceeded these and shows particular  
51  
52 25 promise when implemented in conjunction with free fitness provision.  
53  
54  
55  
56  
57  
58  
59  
60

1  
2  
3 1  
4  
5 2 Demonstrating effectiveness is of limited use, however, unless a successful programme in  
6  
7 3 one area may be adapted and implemented to suit a different context, for example through  
8  
9 4 sharing local-level knowledge, interactions and behaviours of actors within different parts of  
10  
11 5 that system.<sup>45</sup> The process for scaling-up of effective health interventions to broader policy  
12  
13 6 and practice takes years<sup>46</sup> and certainly within the obesity literature, has been dominated by  
14  
15 7 initiatives that consider effectiveness but not implementation across specific settings.<sup>47-48</sup>  
16  
17 8 Whilst recognising the small sample size in this evaluation, the prototyping approach shows  
18  
19 9 promise in successfully testing innovations iteratively. Furthermore, ongoing refinement  
20  
21 10 considering the interplay between a programme and its delivery context could be built into  
22  
23 11 larger public health interventions.  
24  
25  
26  
27  
28  
29  
30

### 31 **CONCLUSION**

32  
33 14  
34  
35 15 This evaluation extends the literature by exploring prototyping for a complex problem,  
36  
37 16 community weight-management, in a challenging setting, demonstrating streamlined  
38  
39 17 implementation of an ‘off-the-shelf’ weight management programme. We demonstrate good  
40  
41 18 outcome effectiveness for ‘Momenta’, particularly in conjunction with a free fitness offer.  
42  
43 19 This resource-effective approach is highly relevant in the context of health inequalities and  
44  
45 20 public health sector funding constraints. We recommend prototyping in public health  
46  
47 21 evaluation providing: 1. The original programme has a strong theoretical and empirical basis,  
48  
49 22 and 2. All stakeholders shape implementation, with evaluation sought during early delivery  
50  
51 23 phases to iteratively refine the process.  
52  
53  
54  
55  
56  
57  
58  
59  
60

1 **Acknowledgements:** Many thanks to Jordan Bell, Nicole Rowley and Ross Davison, who  
2 collected and collated raw quantitative data.

3  
4 **Author Contributions:** CDR, CH and EO contributed to design of the quantitative  
5 evaluation, data analysis and preparation the final document. LN contributed to design and  
6 analyses of the qualitative evaluation component. TF contributed to qualitative design and  
7 analysis and preparation of the final document. AL contributed to design of the quantitative  
8 evaluation and preparation of the final document.

9  
10 **Funding:** The quantitative evaluation component was supported by funding from the  
11 Wolfson Research Institute for Health and Wellbeing, Durham University. Amelia Lake is a  
12 member of Fuse, the Centre for Translational Research in Public Health ([www.fuse.ac.uk](http://www.fuse.ac.uk)).  
13 Fuse is a UK Clinical Research Collaboration (UKCRC) Public Health Research Centre of  
14 Excellence. Funding for Fuse from the British Heart Foundation, Cancer Research UK,  
15 Economic and Social Research Council, Medical Research Council, the National Institute for  
16 Health Research, under the auspices of the UKCRC, is gratefully acknowledged. The views  
17 expressed in this paper do not necessarily represent those of the funders or UKCRC. The  
18 funders had no role in study design, data collection and analysis, decision to publish, or  
19 preparation of the manuscript.

20  
21 **Competing interests:** CH is a former employee of the Leisure Trust and was instrumental in  
22 initiating the evaluation. She was subsequently employed as a research assistant at Durham  
23 University, however was not involved in any data collection or entry, only accessing an  
24 anonymised database submitted to the University. LN was a Public Health Improvement

1  
2  
3 1 Manager within the Public Health Team and had responsibility for commissioning the  
4  
5 2 Momenta programme. The qualitative evaluation component was submitted in partial  
6  
7 3 fulfilment of her Masters in Public Health at Newcastle University.  
8  
9  
10  
11 4

12  
13 5 **Participant consent:** Consent was obtained for face-to-face interviews and focus groups.  
14  
15 6 Service users were informed in writing of the nature of the quantitative service evaluation and  
16  
17 7 how to withdraw from it. The presented data are anonymised with risk of identification low.  
18  
19  
20  
21 8

22  
23  
24 9 **Ethics approval:** Ethical advice was sought from the local Research Manager of North of  
25  
26 10 England Commissioning Support, and this project was classed as a service evaluation in line  
27  
28 11 with National Research Ethics Service guidance.  
29  
30  
31 12

32  
33  
34 13 **Data sharing statement:** No additional data are available  
35  
36  
37 14

1  
2  
3 **1 REFERENCES**  
4  
5 2  
6 3  
7 4

- 8 1. Haines A, Kuruvilla S, Borchert M. Bridging the implementation gap between knowledge  
9 and action for health. (Theme Papers). *Bull World Health Organ* 2004;82:724.  
10  
11  
12  
13 6 2. Curran GM, Bauer M, Mittman B, *et al.* Effectiveness-implementation Hybrid Designs:  
14 Combining Elements of Clinical Effectiveness and Implementation Research to Enhance  
15 Public Health Impact. *Med Care* 2012;50:217-26.  
16 7  
17  
18 8  
19 9 3. Sales A, Smith J, Curran G, *et al.* Models, Strategies, and Tools: Theory in Implementing  
20 Evidence-Based Findings into Health Care Practice. *J Gen Int Med* 2006;21:S43-S9.  
21  
22  
23 10 4. Kilbourne AM, Neumann MS, Pincus HA, *et al.* Implementing evidence-based  
24 interventions in health care: application of the replicating effective programs framework.  
25  
26  
27 11 5. Meisinger C, Döring A, Thorand B, *et al.* Body fat distribution and risk of type 2 diabetes  
28 in the general population: are there differences between men and women? The  
29 MONICA/KORA Augsburg Cohort Study. *Am J Clin Nutr* 2006;84:483-9.  
30  
31  
32 12  
33  
34 13  
35  
36  
37  
38 14 6. Bhaskaran K, Douglas I, Forbes H, *et al.* Body-mass index and risk of 22 specific  
39 cancers: a population-based cohort study of 5·24 million UK adults. *Lancet*  
40  
41  
42 15  
43 16  
44  
45  
46  
47 17  
48  
49 18  
50  
51 19  
52  
53  
54  
55  
56  
57  
58  
59  
60

- 1  
2  
3 1 7. Zhang C, Rexrode KM, Van Dam RM, *et al.* Abdominal obesity and the risk of all-cause,  
4 cardiovascular, and cancer mortality: sixteen years of follow-up in US women. *Circ*  
5 2  
6 cardiovascular, and cancer mortality: sixteen years of follow-up in US women. *Circ*  
7 3  
8 2008;117:1658-67.  
9  
10  
11  
12 4 8. Kolotkin RL, Andersen JR. A systematic review of reviews: exploring the relationship  
13 between obesity, weight loss and health-related quality of life. *Clin Obes* 2017;7:273-89.  
14 5  
15  
16  
17  
18 6 9. Simon GE, Von Korff M, Saunders K, *et al.* Association between obesity and psychiatric  
19 disorders in the us adult population. *Arch Gen Psychiatry* 2006;63(7):824-30.  
20 7  
21  
22  
23  
24  
25 8 10. Public Health England. *Health matters: obesity and the food environment environment.*  
26 UK: Public Health England, 2017. [https://www.gov.uk/government/publications/health-](https://www.gov.uk/government/publications/health-matters-obesity-and-the-food-environment/health-matters-obesity-and-the-food-environment--2)  
27 9  
28 [matters-obesity-and-the-food-environment/health-matters-obesity-and-the-food-](https://www.gov.uk/government/publications/health-matters-obesity-and-the-food-environment/health-matters-obesity-and-the-food-environment--2)  
29 10  
30 [environment--2](https://www.gov.uk/government/publications/health-matters-obesity-and-the-food-environment/health-matters-obesity-and-the-food-environment--2). (Accessed 10 Aug 2018)  
31 11  
32  
33  
34  
35  
36 12 11. World Health Organisation. *Global status report on noncommunicable diseases 2014.*  
37 Geneva: World Health Organisation, 2014.  
38  
39 13  
40  
41 14 [https://apps.who.int/iris/bitstream/handle/10665/148114/9789241564854\\_eng.pdf;jses](https://apps.who.int/iris/bitstream/handle/10665/148114/9789241564854_eng.pdf;jsessionid=A043D0E63AACA67752CC3294A1EBD7A3?sequence=1)  
42  
43 15 [sionid=A043D0E63AACA67752CC3294A1EBD7A3?sequence=1](https://apps.who.int/iris/bitstream/handle/10665/148114/9789241564854_eng.pdf;jsessionid=A043D0E63AACA67752CC3294A1EBD7A3?sequence=1). (Accessed 04 Feb  
44 16  
45 2019)  
46  
47  
48  
49  
50 17 12. Bambra C, Hillier F, Cairns J, *et al.* How effective are interventions at reducing  
51 socioeconomic inequalities in obesity among children and adults? Two systematic  
52 18  
53 socioeconomic inequalities in obesity among children and adults? Two systematic  
54 19  
55 reviews. *Public Health Res* 2015;3.  
56  
57  
58  
59  
60

- 1  
2  
3 1 13. Bull ER, Dombrowski SU, McCleary N, *et al.* Are interventions for low-income groups  
4  
5 2 effective in changing healthy eating, physical activity and smoking behaviours? A  
6  
7 3 systematic review and meta-analysis. *BMJ Open*. 2014;4:e006046.  
8  
9  
10  
11  
12 4 14. Office for National Statistics. *Dataset: Regional gross value added (balanced) by*  
13  
14 5 *combined authority in the UK*. UK: Office for National Statistics, 2017.  
15  
16 6 [https://www.ons.gov.uk/economy/grossvalueaddedgva/datasets/regionalgrossvalueaddedb](https://www.ons.gov.uk/economy/grossvalueaddedgva/datasets/regionalgrossvalueaddedbalancedbycombinedauthorityintheuk)  
17  
18 7 [alancedbycombinedauthorityintheuk](https://www.ons.gov.uk/economy/grossvalueaddedgva/datasets/regionalgrossvalueaddedbalancedbycombinedauthorityintheuk). (Accessed 10 Aug 2018)  
19  
20  
21  
22  
23 8 15. Public Health England. *Work, worklessness and health: local infographic tool*. UK:  
24  
25 9 Public Health England, 2018. [https://www.gov.uk/government/publications/work-](https://www.gov.uk/government/publications/work-worklessness-and-health-local-infographic-tool)  
26  
27 10 [worklessness-and-health-local-infographic-tool](https://www.gov.uk/government/publications/work-worklessness-and-health-local-infographic-tool). (Accessed 10 Aug 2018)  
28  
29  
30  
31  
32 11 16. Northumberland County Council. *Public Health Service Statement 2017/18*.  
33  
34 12 Northumberland: Northumberland County Council, 2017.  
35  
36 13 [https://northumberland.gov.uk/NorthumberlandCountyCouncil/media/About-the-](https://northumberland.gov.uk/NorthumberlandCountyCouncil/media/About-the-Council/Performance/Service%20Statements%202016/2017-Public-Health-Service-Statement-2017-18.pdf)  
37  
38 14 [Council/Performance/Service%20Statements%202016/2017-Public-Health-Service-](https://northumberland.gov.uk/NorthumberlandCountyCouncil/media/About-the-Council/Performance/Service%20Statements%202016/2017-Public-Health-Service-Statement-2017-18.pdf)  
39  
40 15 [Statement-2017-18.pdf](https://northumberland.gov.uk/NorthumberlandCountyCouncil/media/About-the-Council/Performance/Service%20Statements%202016/2017-Public-Health-Service-Statement-2017-18.pdf). (Accessed 10 Aug 2018)  
41  
42  
43  
44  
45 16 17. Public Health England. *Local Authority Health Profiles*. UK: Public Health England,  
46  
47 17 2019. [https://fingertips.phe.org.uk/profile/health-](https://fingertips.phe.org.uk/profile/health-profiles/data#page/0/gid/1938132701/pat/6/par/E12000001/ati/102/are/E06000057/iid/101/age/169/sex/4)  
48  
49 18 [profiles/data#page/0/gid/1938132701/pat/6/par/E12000001/ati/102/are/E06000057/iid/10](https://fingertips.phe.org.uk/profile/health-profiles/data#page/0/gid/1938132701/pat/6/par/E12000001/ati/102/are/E06000057/iid/101/age/169/sex/4)  
50  
51 19 [101/age/169/sex/4](https://fingertips.phe.org.uk/profile/health-profiles/data#page/0/gid/1938132701/pat/6/par/E12000001/ati/102/are/E06000057/iid/101/age/169/sex/4). (Accessed 01 Feb 2019)  
52  
53  
54  
55  
56 20 18. Lister C, Payne H, Hanson CL, *et al.* The Public Health Innovation Model: Merging  
57  
58 21 Private Sector Processes with Public Health Strengths. *Front Public Health* 2017;5:192.  
59  
60



- 1  
2  
3 1 19. Parry GJ, Carson-Stevens A, Luff DF, *et al.* Recommendations for evaluation of health  
4 care improvement initiatives. *Acad Pediatr* 2013 Nov-Dec;13(6 Suppl):S23-30.  
5  
6 2  
7  
8  
9  
10 3 20. Hawkins J, Madden K, Fletcher A, *et al.* Development of a framework for the co-  
11 production and prototyping of public health interventions. *BMC Public Health*  
12 4  
13 2017;17:689.  
14 5  
15  
16  
17  
18 6 21. Stevens VJ, Funk KL, Brantley PJ, *et al.* Design and implementation of an interactive  
19 website to support long-term maintenance of weight loss. *J Med Internet Res*  
20 7  
21 2008;10(1):e1.  
22 8  
23  
24  
25  
26  
27 9 22. Discover Momenta Ltd. *Momenta*. UK: Discover Momenta Ltd, 2013:  
28  
29 <http://discovermomenta.com/>. (Accessed 10 Aug 2018)  
30 10  
31  
32  
33  
34 11 23. Hanson CL. *Advancing understanding of effective exercise on referral: a mixed methods*  
35 *evaluation of the Northumberland scheme*. PhD Thesis, Durham University, 2017.  
36 12  
37 <http://etheses.dur.ac.uk/12162/>. (Accessed 10 Aug 2018)  
38 13  
39  
40  
41  
42  
43 14 24. Hanson CL, Allin LJ, Ellis JG, *et al.* An evaluation of the efficacy of the exercise on  
44 referral scheme in Northumberland, UK: association with physical activity and predictors  
45 15  
46 of engagement. A naturalistic observation study. *BMJ Open* 2013;3:e002849  
47 16  
48  
49  
50  
51  
52 17 25. Sacher PM, Kolotourou M, Chadwick PM, *et al.* Randomized Controlled Trial of the  
53 MEND Program: A Family-based Community Intervention for Childhood Obesity. *Obes*  
54 18  
55 2012;18:S62-S8.  
56 19  
57  
58  
59  
60

- 1  
2  
3 1 26. Leech N, Onwuegbuzie A. A typology of mixed methods research designs. *Qual Quant*  
4  
5 2 2009;43:265-75.  
6  
7  
8  
9  
10 3 27. Marfell-Jones M, Olds T, Stewart A, *et al.* *International Standards for Anthropometric*  
11  
12 4 *Assessment (2007)*. Potchefstroom, South Africa: International Society for the  
13  
14 5 Advancement of Kinanthropometry, 2007.  
15  
16  
17  
18 6 28. World Health Organisation. *BMI Classification 2006*. Geneva: World Health  
19  
20 7 Organisation, 2006. [http://apps.who.int/bmi/index.jsp?introPage=intro\\_3.html](http://apps.who.int/bmi/index.jsp?introPage=intro_3.html). (Accessed  
21  
22 8 10 Aug 2018)  
23  
24  
25  
26  
27 9 29. Clarke A, Friede T, Putz R, *et al.* Warwick-Edinburgh Mental Well-being Scale  
28  
29 10 (WEMWBS): Validated for teenage school students in England and Scotland. A mixed  
30  
31 11 methods assessment. *BMC Public Health* 2011;11:487.  
32  
33  
34  
35  
36 12 30. Zigmond AS, Snaith RP. The Hospital Anxiety and Depression Scale. *Acta Psychiatr*  
37  
38 13 *Scand* 1983;67:361-70.  
39  
40  
41  
42  
43 14 31. Tong A, Sainsbury P, Craig J. Consolidated criteria for reporting qualitative research  
44  
45 15 (COREQ): a 32-item checklist for interviews and focus groups. *Int J Qual. Health Care*  
46  
47 16 2007;19:349-57  
48  
49  
50  
51  
52 17 32. Braun V, Clarke V. Using thematic analysis in psychology. *Qual Res Psychol* 2006;3:77-  
53  
54 18 101.  
55  
56  
57  
58  
59  
60

- 1  
2  
3 1 33. Madigan CD, Daley AJ, Lewis AL, *et al.* Which weight-loss programmes are as effective  
4  
5 2 as Weight Watchers®? *Brit J Gen Pract* 2014;64(620):e128-e136.  
6  
7  
8  
9  
10 3 34. Mastellos N, Gunn LH, Felix LM, *et al.* Transtheoretical model stages of change for  
11  
12 4 dietary and physical exercise modification in weight loss management for overweight and  
13  
14 5 obese adults. *Cochrane Database Syst Rev* 2014;2:CD008066  
15  
16  
17  
18  
19 6 35. Garrow JS, Summerbell CD. Meta-analysis: effect of exercise, with or without dieting, on  
20  
21 7 the body composition of overweight subjects. *Eur J Clin Nutr* 1995;49:1-10.  
22  
23  
24  
25 8 36. Wright F, Boyle S, Baxter K, *et al.* Understanding the relationship between weight loss,  
26  
27 9 emotional well-being and health-related quality of life in patients attending a specialist  
28  
29 10 obesity weight management service. *J Health Psychol* 2013;18:574-86.  
30  
31  
32  
33  
34 11 37. Somerville R, McKenzie K, Eslami S, *et al.* Poor mental health in severely obese patients  
35  
36 12 is not explained by the presence of comorbidities. *Clin Obes* 2014;5:12-21.  
37  
38  
39  
40  
41 13 38. Flodgren G, Goncalves BDC, Summerbell CD. Interventions to change the behaviour of  
42  
43 14 health professionals and the organisation of care to promote weight reduction in children  
44  
45 15 and adults with overweight or obesity. *Cochrane Database of Syst Rev*  
46  
47 16 2017;11:CD000984.  
48  
49  
50  
51  
52 17 39. Phelan SM, Burgess DJ, Yeazel MW, *et al.* Impact of weight bias and stigma on quality  
53  
54 18 of care and outcomes for patients with obesity. *Obes Rev* 2015;16:319-26.  
55  
56  
57  
58  
59  
60

- 1  
2  
3 1 40. Logue J, Allardice G, Gillies M, *et al.* Outcomes of a specialist weight management  
4 programme in the UK National Health Service: prospective study of 1838 patients. *BMJ*  
5  
6 2 *Open* 2014;4:e003747.  
7  
8 3  
9  
10  
11  
12 4 41. Lebrun LA, Chowdhury J, Sripipatana A, *et al.* Overweight/obesity and weight-related  
13 treatment among patients in U.S. federally supported health centers. *Obes Res Clin Pract*  
14 5  
15 *2013;7:e377-e90.*  
16 6  
17  
18  
19  
20  
21 7 42. Ahern AL, Aveyard P, Boyland EJ, *et al.* Inequalities in the uptake of weight  
22 management interventions in a pragmatic trial: an observational study in primary care. *Br*  
23 8  
24 *J Gen Pract* 2016;66(645):e258-63.  
25 9  
26  
27  
28  
29  
30 10 43. Adams J, Mytton O, White M, *et al.* Why Are Some Population Interventions for Diet  
31 and Obesity More Equitable and Effective Than Others? The Role of Individual Agency.  
32 11  
33 *PLoS Med* 2016;13(4).  
34 12  
35  
36  
37  
38  
39 13 44. Medical Research Council. *Developing and evaluating complex interventions: new*  
40 guidance. UK: Medical Research Council, 2006.  
41 14  
42 <https://mrc.ukri.org/documents/pdf/developing-and-evaluating-complex-interventions/>.  
43 15  
44  
45 16 (Accessed 10 Aug 2018)  
46  
47  
48  
49  
50 17 45. Curtis S, Oven K, Wistow J, *et al.* Adaptation to extreme weather events in complex  
51 health and social care systems: The example of older people's services in England.  
52 18  
53 *Environ Plann C: Politics and Space* 2018;36:67-91.  
54 19  
55  
56  
57  
58  
59  
60

- 1  
2  
3 1 46. Milat AJ, King L, Newson R, *et al*. Increasing the scale and adoption of population health  
4  
5 2 interventions: experiences and perspectives of policy makers, practitioners, and  
6  
7 3 researchers. *Health Res Policy and Systems* 2014;12:18.  
8  
9  
10  
11  
12 4 47. Jebb S. *Dusting off Foresight's obesity report*. Foresight Blog UK: Government Office  
13  
14 5 for Science, 2017. [https://foresightprojects.blog.gov.uk/2017/10/04/dusting-off-](https://foresightprojects.blog.gov.uk/2017/10/04/dusting-off-foresights-obesity-report/)  
15  
16 6 [foresights-obesity-report/](https://foresightprojects.blog.gov.uk/2017/10/04/dusting-off-foresights-obesity-report/). (Accessed 01 Feb 2019)  
17  
18  
19  
20  
21 7 48. Wolfenden L, Goldman S, Stacey FG *et al*. Strategies to improve the implementation of  
22  
23 8 workplace-based policies or practices targeting tobacco, alcohol, diet, physical activity  
24  
25 9 and obesity. *Cochrane Database of Syst Rev* 2018;11:CD012439.  
26  
27  
28  
29  
30 10  
31  
32 11  
33  
34 12  
35  
36 13  
37  
38 14  
39  
40 15  
41  
42 16  
43  
44 17  
45  
46 18  
47  
48 19  
49  
50 20  
51  
52 21  
53  
54 22  
55  
56  
57  
58  
59  
60

**SUPPLEMENTARY FILE 1.****Healthcare professionals' semi-structured interview guide**

*Semi Structured Interview Set the interviewee at ease; explain purpose of the interview; offer a better understanding of what the referral process requires to aid tier 2 weight management to be delivered in Northumberland; explanation about how the interview will be recorded; reaffirmation of consent; and how the information will be analysed and stored; rules of confidentiality / anonymity etc.*

**Questions:**

1. Thinking about raising the weight issue, tell me about your experience of discussing weight with patients.

*Prompts*

- *How does it feel to raise weight as an issue?*
- *Are patients open to discussing weight problems?*
- *Do you find a difference between genders when discussing weight?*
- *What helps you, such as the NHS Health Check Programme, to raise the issue of weight?*
- *What else would help to raise the issue or weight in appointments?*

2. Greater retention is often achieved when patients are ready to change, tell me how you work with / assess patient's readiness to change.

*Prompts*

- *Have you had training around the cycle of change?*
- *Do you use any specific tools or resources to assess the patient?*
- *What would help you to assess the patient's readiness to change?*

- 1  
2  
3  
4  
5  
6  
7  
8  
9  
10  
11  
12  
13  
14  
15  
16  
17  
18  
19  
20  
21  
22  
23  
24
3. Thinking the information and resources available to you during the referral, do you feel you had enough information and resources to encourage patient take up of the programme?

25  
26  
27  
28  
29

*Prompts*

- 30  
31  
32  
33  
34  
35  
36  
37  
38  
39  
40  
41  
42  
43  
44  
45  
46  
47
- *Did you have enough background information?*
  - *Were the referral forms suitable / capture all the information required?*
  - *Were the patient leaflets / resources suitable?*
  - *Were there questions or issues raised that couldn't be answered?*
  - *Was the process easy to use?*
  - *What else could help you to make referrals to weight management programmes?*

- 48  
49  
50  
51  
52  
53  
54  
55  
56  
57  
58  
59  
60
4. Thinking about after you referred the patient, what happened next? (excluded after pilot)

*Prompts*

- *Did you get feedback from the weight management programme on the progress of your patient?*
- *Did your patients achieve weight loss?*
- *Did your patient come back and talk about their experience?*

5. What things are most likely to prevent you from making the referral a weight management programme, either commercial or Public Health funded?

*Prompts*

- *Are there barriers that you perceive, such as cost to the patient?*
- *Are you concerned with raising the weight issue?*
- *Is it a time factor if the patient has an appointment for anything other than a weight issue?*
- *What would help you to overcome the barriers that prevent you from making the referral?*

- 1  
2  
3  
4  
5  
6  
7
6. Is there anything else that you would like to tell me about your expectations and experiences of the weight management programme?

8 **Focus Group Topic Guide**

9

10  
11  
12  
13  
14 *Set group at ease; explain purpose of the focus group; offer a better understanding of what works for*  
15 *people in terms of tier 2 weight management and what doesn't, aiding development of an effective*  
16 *programme for Northumberland residents; explanation about how the focus group will be recorded;*  
17 *reaffirmation of consent; and how the information will be analysed and stored; rules of confidentiality /*  
18 *anonymity etc.*

- 19  
20  
21  
22  
23  
24  
25  
26  
27  
28
1. Tell me a bit about what sort of weight management activity you have taken part in, in the past.

29  
30  
31  
32 *Prompts*

- 33  
34  
35  
36  
37  
38  
39  
40  
41  
42  
43
- *What influence have others had on your weight management?*
  - *Do you have any particular likes/dislikes of physical activity/managing weight/nutrition*
  - *Has there been anything else that has influenced your management of weight?*

- 44  
45  
46  
47  
48
2. So thinking about the weight management programme you have undertaken, how did you find out about it?

49  
50  
51 *Prompts*

- 52  
53  
54  
55  
56  
57  
58  
59  
60
- *Who / what motivated you to attend?*
  - *What made you decide that this is the right time to look at managing your weight?*
  - *Did the time of year make a difference?*



1 3. Thinking about your experience of when you were referred to the weight management programme,  
2  
3 how did you find the process?  
4

5 *Prompts*  
6

- 7
- 8 • *What type of health professional referred you? (GP / Practice Nurse)*
  - 9
  - 10 • *Did you specifically attend Primary Care to discuss your weight?*
  - 11
  - 12 • *How was weight raised?*
  - 13
  - 14 • *What did the referrer explain to you about the programme? Did you get enough information?*
  - 15
  - 16 • *How long was it from your referral from Primary Care to the first assessment in the weight*  
17 *management programme; was this what you expected? Were you still motivated?*  
18  
19  
20  
21  
22  
23  
24

25 4. How did you feel about being referred?  
26

- 27
- 28 • *Prompts*
  - 29
  - 30 • *How confident did you feel about taking part in the programme?*
  - 31
  - 32 • *Was there anything that you were particularly looking forward to?*
  - 33
  - 34 • *Was there anything that you were worried about?*  
35  
36  
37  
38  
39

40 5. What did you hope to achieve by taking part in the weight management programme?  
41

42 *Prompts*  
43

- 44
- 45 • *What were your expectations when you start attending the scheme?*
  - 46
  - 47 • *Have there been changes to your health that you expected happen as a result of*  
48 *participation?*
  - 49
  - 50 • *How quickly did you expect to see these changes? And did this happen?*  
51  
52  
53  
54  
55  
56  
57

58 6. Thinking about after you were referred, what happened next?  
59

60 *Prompts*

- *How long after referral did it take to be contacted by the Active Northumberland?*
- *What information did you receive prior to the initial consultation?*
- *How comfortable did you feel coming to the initial consultation?*

7. What influenced you most to attend the weight management programme?

*Prompts*

- *What did you expect from the staff?*
- *How important to you were changes in health or weight?*
- *Why were the influences raised important?*

8. What things were most likely to prevent you from attending the programme?

*Prompts*

- *Tell me about any worries you might have had about health issues.*
- *Tell me about any other things, such as other commitments, that might have stopped you from attending*
- *Did any of these issues arise? How did you overcome these issues?*

9. Now that you have completed the programme, tell me how did you felt about undertaking the weight management programme?

*Prompts*

- *Did you achieve the health / weight outcomes you expected?*
- *Why do you think it worked or not for you?*
- *Do you feel you now have the tools to continue to make positive lifestyle choices?*
- *Is there something that will prevent you to continue to make positive lifestyle choices?*

10. Is there anything else that you would like to tell me about your expectations and experiences  
of the weight management programme?

For peer review only

1  
2  
3  
4  
5  
6  
7  
8  
9  
10  
11  
12  
13  
14  
15  
16  
17  
18  
19  
20  
21  
22  
23  
24  
25  
26  
27  
28  
29  
30  
31  
32  
33  
34  
35  
36  
37  
38  
39  
40  
41  
42  
43  
44  
45  
46  
47  
48  
49  
50  
51  
52  
53  
54  
55  
56  
57  
58  
59  
60

## COREQ (CONsolidated criteria for REporting Qualitative research) Checklist

A checklist of items that should be included in reports of qualitative research. You must report the page number in your manuscript where you consider each of the items listed in this checklist. If you have not included this information, either revise your manuscript accordingly before submitting or note N/A.

| Topic                                          | Item No. | Guide Questions/Description                                                                                                                              | Reported on Page No. |
|------------------------------------------------|----------|----------------------------------------------------------------------------------------------------------------------------------------------------------|----------------------|
| <b>Domain 1: Research team and reflexivity</b> |          |                                                                                                                                                          |                      |
| <i>Personal characteristics</i>                |          |                                                                                                                                                          |                      |
| Interviewer/facilitator                        | 1        | Which author/s conducted the interview or focus group?                                                                                                   |                      |
| Credentials                                    | 2        | What were the researcher's credentials? E.g. PhD, MD                                                                                                     |                      |
| Occupation                                     | 3        | What was their occupation at the time of the study?                                                                                                      |                      |
| Gender                                         | 4        | Was the researcher male or female?                                                                                                                       |                      |
| Experience and training                        | 5        | What experience or training did the researcher have?                                                                                                     |                      |
| <i>Relationship with participants</i>          |          |                                                                                                                                                          |                      |
| Relationship established                       | 6        | Was a relationship established prior to study commencement?                                                                                              |                      |
| Participant knowledge of the interviewer       | 7        | What did the participants know about the researcher? e.g. personal goals, reasons for doing the research                                                 |                      |
| Interviewer characteristics                    | 8        | What characteristics were reported about the interviewer/facilitator? e.g. Bias, assumptions, reasons and interests in the research topic                |                      |
| <b>Domain 2: Study design</b>                  |          |                                                                                                                                                          |                      |
| <i>Theoretical framework</i>                   |          |                                                                                                                                                          |                      |
| Methodological orientation and Theory          | 9        | What methodological orientation was stated to underpin the study? e.g. grounded theory, discourse analysis, ethnography, phenomenology, content analysis |                      |
| <i>Participant selection</i>                   |          |                                                                                                                                                          |                      |
| Sampling                                       | 10       | How were participants selected? e.g. purposive, convenience, consecutive, snowball                                                                       |                      |
| Method of approach                             | 11       | How were participants approached? e.g. face-to-face, telephone, mail, email                                                                              |                      |
| Sample size                                    | 12       | How many participants were in the study?                                                                                                                 |                      |
| Non-participation                              | 13       | How many people refused to participate or dropped out? Reasons?                                                                                          |                      |
| <i>Setting</i>                                 |          |                                                                                                                                                          |                      |
| Setting of data collection                     | 14       | Where was the data collected? e.g. home, clinic, workplace                                                                                               |                      |
| Presence of non-participants                   | 15       | Was anyone else present besides the participants and researchers?                                                                                        |                      |
| Description of sample                          | 16       | What are the important characteristics of the sample? e.g. demographic data, date                                                                        |                      |
| <i>Data collection</i>                         |          |                                                                                                                                                          |                      |
| Interview guide                                | 17       | Were questions, prompts, guides provided by the authors? Was it pilot tested?                                                                            |                      |
| Repeat interviews                              | 18       | Were repeat interviews carried out? If yes, how many?                                                                                                    |                      |
| Audio/visual recording                         | 19       | Did the research use audio or visual recording to collect the data?                                                                                      |                      |
| Field notes                                    | 20       | Were field notes made during and/or after the interview or focus group?                                                                                  |                      |
| Duration                                       | 21       | What was the duration of the interviews or focus group?                                                                                                  |                      |
| Data saturation                                | 22       | Was data saturation discussed?                                                                                                                           |                      |
| Transcripts returned                           | 23       | Were transcripts returned to participants for comment and/or                                                                                             |                      |

| Topic                                  | Item No. | Guide Questions/Description                                                                                                        | Reported on Page No. |
|----------------------------------------|----------|------------------------------------------------------------------------------------------------------------------------------------|----------------------|
|                                        |          | correction?                                                                                                                        |                      |
| <b>Domain 3: analysis and findings</b> |          |                                                                                                                                    |                      |
| <i>Data analysis</i>                   |          |                                                                                                                                    |                      |
| Number of data coders                  | 24       | How many data coders coded the data?                                                                                               |                      |
| Description of the coding tree         | 25       | Did authors provide a description of the coding tree?                                                                              |                      |
| Derivation of themes                   | 26       | Were themes identified in advance or derived from the data?                                                                        |                      |
| Software                               | 27       | What software, if applicable, was used to manage the data?                                                                         |                      |
| Participant checking                   | 28       | Did participants provide feedback on the findings?                                                                                 |                      |
| <i>Reporting</i>                       |          |                                                                                                                                    |                      |
| Quotations presented                   | 29       | Were participant quotations presented to illustrate the themes/findings?<br>Was each quotation identified? e.g. participant number |                      |
| Data and findings consistent           | 30       | Was there consistency between the data presented and the findings?                                                                 |                      |
| Clarity of major themes                | 31       | Were major themes clearly presented in the findings?                                                                               |                      |
| Clarity of minor themes                | 32       | Is there a description of diverse cases or discussion of minor themes?                                                             |                      |

Developed from: Tong A, Sainsbury P, Craig J. Consolidated criteria for reporting qualitative research (COREQ): a 32-item checklist for interviews and focus groups. *International Journal for Quality in Health Care*. 2007. Volume 19, Number 6: pp. 349 – 357

**Once you have completed this checklist, please save a copy and upload it as part of your submission. DO NOT include this checklist as part of the main manuscript document. It must be uploaded as a separate file.**

# BMJ Open

## Prototyping for public health in a local context: a streamlined evaluation of a community-based weight management programme (Momenta), Northumberland, UK

|                                 |                                                                                                                                                                                                                                                                                                                                                                                                                                                                                                                                                                                                                                                                                                                                                                                                                                                                                      |
|---------------------------------|--------------------------------------------------------------------------------------------------------------------------------------------------------------------------------------------------------------------------------------------------------------------------------------------------------------------------------------------------------------------------------------------------------------------------------------------------------------------------------------------------------------------------------------------------------------------------------------------------------------------------------------------------------------------------------------------------------------------------------------------------------------------------------------------------------------------------------------------------------------------------------------|
| Journal:                        | <i>BMJ Open</i>                                                                                                                                                                                                                                                                                                                                                                                                                                                                                                                                                                                                                                                                                                                                                                                                                                                                      |
| Manuscript ID                   | bmjopen-2019-029718.R1                                                                                                                                                                                                                                                                                                                                                                                                                                                                                                                                                                                                                                                                                                                                                                                                                                                               |
| Article Type:                   | Original research                                                                                                                                                                                                                                                                                                                                                                                                                                                                                                                                                                                                                                                                                                                                                                                                                                                                    |
| Date Submitted by the Author:   | 23-May-2019                                                                                                                                                                                                                                                                                                                                                                                                                                                                                                                                                                                                                                                                                                                                                                                                                                                                          |
| Complete List of Authors:       | Dodd-Reynolds, Caroline; Durham University, Department of Sport and Exercise Sciences; Durham University, Wolfson Research Institute for Health and Wellbeing Physical Activity Special Interest Group<br>Nevens, Lisa; Northumbria Healthcare NHS Foundation Trust Community Services Business Unit<br>Oliver, Emily; Durham University, Wolfson Research Institute for Health and Wellbeing Physical Activity Special Interest Group; Durham University, Department of Sport and Exercise Sciences,<br>Finch, Tracy; Northumbria University, Nursing, Midwifery and Health<br>Lake, Amelia; Department of Science, School of Science, Engineering and Design, Teesside University<br>Hanson, Coral; Edinburgh Napier University, School of Health and Social Care; Durham University, Wolfson Research Institute for Health and Wellbeing Physical Activity Special Interest Group |
| <b>Primary Subject Heading</b>: | Public health                                                                                                                                                                                                                                                                                                                                                                                                                                                                                                                                                                                                                                                                                                                                                                                                                                                                        |
| Secondary Subject Heading:      | Nutrition and metabolism                                                                                                                                                                                                                                                                                                                                                                                                                                                                                                                                                                                                                                                                                                                                                                                                                                                             |
| Keywords:                       | public health evaluation, prototyping, implementation, community weight management, NUTRITION & DIETETICS, exercise referral                                                                                                                                                                                                                                                                                                                                                                                                                                                                                                                                                                                                                                                                                                                                                         |
|                                 |                                                                                                                                                                                                                                                                                                                                                                                                                                                                                                                                                                                                                                                                                                                                                                                                                                                                                      |

SCHOLARONE™  
Manuscripts

1  
2  
3 1 Prototyping for public health in a local context: a streamlined evaluation of a community-  
4 based weight management programme (Momenta), Northumberland, UK  
5  
6 2  
7  
8 3

9  
10 4 Caroline J Dodd-Reynolds<sup>1,2</sup> (corresponding author\*), Lisa Nevens<sup>3</sup>, Emily J Oliver<sup>1,2</sup>, Tracy  
11 Finch<sup>4</sup>, Amelia A Lake<sup>5,6</sup> Coral L Hanson<sup>7</sup>  
12  
13 5  
14  
15 6

16  
17  
18 7 <sup>1</sup>Department of Sport and Exercise Sciences, Durham University, Durham, DH1 3HN, UK\*.  
19

20 8 Email: caroline.dodd-reynolds@durham.ac.uk Tel: +44(0)191 3342000  
21

22 9 <sup>2</sup>Wolfson Research Institute for Health and Wellbeing Physical Activity Special Interest  
23 Group, Durham University, Durham, UK.  
24  
25 10

26  
27 11 <sup>3</sup>Northumbria Healthcare NHS Foundation Trust, Northumberland, UK.  
28

29 12 <sup>4</sup>Department of Nursing, Midwifery and Health, Northumbria University, Newcastle upon  
30 Tyne, UK  
31  
32 13

33 14 <sup>5</sup>Department of Science, School of Science, Engineering and Design, Teesside University,  
34 Teesside, UK  
35  
36 15

37  
38 16 <sup>6</sup>Fuse – UKCRC Centre for Translational Research in Public Health, UK  
39

40 17 <sup>7</sup>School of Health and Social Care, Edinburgh Napier University, Edinburgh, UK  
41  
42  
43 18

44  
45  
46 19 **Word count:** 4214  
47

48  
49 20 **Keywords:** Public health evaluation, prototyping, implementation, community weight  
50 management, diet, exercise referral  
51

52 22  
53  
54 23  
55  
56 24  
57  
58  
59 25  
60

## 1 ABSTRACT

2 **Objectives** Stakeholder co-production in design of public health programmes may reduce the  
3 ‘implementation gap’ but can be time-consuming and costly. Prototyping, iterative refining  
4 relevant to delivery context, offers a potential solution. This evaluation explored  
5 implementation and lessons learned for a 12-week referral-based weight-management  
6 programme, ‘Momenta’, along with feasibility of an iterative prototyping evaluation  
7 framework.

8 **Design** Mixed methods evaluation: analysis of anonymised service data provided for  
9 physiological and psychological outcomes (12 and 52 weeks), qualitative exploration of  
10 implementation with referrers and service users.

11 **Setting** Two leisure centres in Northumberland, northeast England.

12 **Participants** Individuals (n=182) with BMI>24.9 kg/m<sup>2</sup>, referred by healthcare  
13 professionals. Individual interviews with referring professionals (n=5) and focus groups with  
14 service users (n=13).

15 **Interventions** Three 12-week programme iterations: Momenta (n=59), Momenta-Fitness  
16 membership (Momenta-Fitness) (n=58), and Fitness membership only (n=65).

17 **Primary and secondary outcome measures** Weight loss, BMI, waist circumference, uptake,  
18 adherence, mental wellbeing, anxiety, depression. Qualitative themes developed through  
19 stakeholder-engagement.

20 **Results** 12-week weight loss [median kg, (interquartile range)] was observed for Momenta -  
21 2.9 (-5.0 to -2.0) and Momenta-Fitness -2.9 (-5.1 to -1.6) p< 0.001, but not Fitness-only.  
22 Preliminary 52-week follow-up suggested weight loss maintenance for Momenta-Fitness.



1  
2  
3 1 Uptake and 12-week retention were higher for Momenta (84.7%, 45.8%) and Momenta-  
4  
5 2 Fitness (93.1%, 60.3%) versus Fitness-only (75.4%, 24.6%). 12-week mental wellbeing,  
6  
7 3 anxiety and depression improved in Momenta and Momenta-Fitness, remaining at 52 weeks  
8  
9  
10 4 ( $p < 0.05$ ). Service users reported positive experiences of Momenta. Implementation gaps  
11  
12 5 were revealed around the referral process itself and practitioner knowledge. Prototyping  
13  
14 6 enabled important iterative refinements such as broadening inclusion criteria.  
15  
16  
17 7 **Conclusions** Momenta has potential for weight loss, particularly when offered with a fitness  
18  
19 8 membership. Identification of issues with referral process enabled real-time iterative  
20  
21 9 refinement to address some of these, whilst lessons learned may be of value for local  
22  
23 10 implementation of ‘off-the-shelf’ weight management packages more generally.  
24  
25  
26  
27 11  
28  
29  
30 12  
31  
32  
33 13  
34  
35  
36 14  
37  
38  
39 15  
40  
41  
42 16  
43  
44  
45 17  
46  
47  
48 18  
49  
50  
51 19  
52  
53  
54 20  
55  
56  
57 21  
58  
59  
60

1  
2  
3 1 **ARTICLE SUMMARY**  
4  
5

6 2  
7  
8

9 3 **Strengths and limitations of this study**  
10  
11  
12 4

13  
14  
15 5 • This study advances understanding about whether prototyping is a time-efficient and  
16  
17  
18 6 cost-effective approach to design and implementation of public health programmes.  
19

20 7  
21  
22 8 • This mixed methods evaluation provides insight into the implementation of an ‘off-  
23  
24  
25 9 the-shelf’ weight management programme, in a local context.  
26

27 10  
28  
29 11 • Embedding stakeholders’ views throughout the entire evaluation process allowed for  
30  
31  
32 12 ongoing, iterative refinement.  
33

34 13  
35  
36 14 • A limitation to the quantitative component is the small sample size and findings  
37  
38  
39 15 should be interpreted with caution.  
40

41 16  
42  
43 17 • Qualitative interviews and focus groups can only provide information about what  
44  
45  
46 18 participants recall about their experiences, meaning that there is a potential for recall  
47  
48  
49 19 bias.  
50

51 20  
52  
53  
54 21  
55  
56  
57  
58  
59  
60

## 1 INTRODUCTION

2  
3  
4  
5  
6  
7  
8 Failure to implement effective public health interventions when programmes are scaled up or  
9  
10 transferred across contexts is widely reported.<sup>1</sup> Proposed approaches attempting to address  
11  
12 this implementation gap include; effectiveness-implementation hybrid designs,<sup>2</sup> linking  
13  
14 action to theory and models based on theory,<sup>3</sup> and application of the replicating effective  
15  
16 programmes framework.<sup>4</sup> Common to all is advocacy of a developmental process reflecting  
17  
18 on existing knowledge about the target population and planned programme prior to service  
19  
20 delivery. Furthermore, engagement of service users is encouraged at all stages of intervention  
21  
22 and evaluation design in MRC guidance.<sup>5</sup> Although this increases the likelihood of services  
23  
24 meeting all stakeholder's needs, concerns about the practical, personal, and professional costs  
25  
26 of co-production have been raised.<sup>6</sup> Resulting well-designed services will be tailored to a  
27  
28 problem that may have changed during the time spent developing the intervention.  
29  
30  
31 Additionally, public access may be delayed. Resource-pressured public health services must  
32  
33 therefore consider pragmatic alternatives to service design and implementation. In this paper,  
34  
35 we explore a novel evaluation approach to these implementation challenges, focusing on a  
36  
37 problem high on the public health agenda: obesity and overweight.  
38  
39  
40  
41  
42  
43  
44

45 Targeting elevated weight status is a public health priority, obesity being a recognised risk  
46  
47 factor for many physical and psychological health outcomes.<sup>7-11</sup> In England for example,  
48  
49 obesity and overweight are associated with 30,000 deaths and an estimated National Health  
50  
51 Service cost of £6.1 billion per annum.<sup>12</sup> Globally, countries with higher income inequalities  
52  
53 tend to have higher rates of obesity.<sup>13</sup> Excess weight is also associated with widening social  
54  
55 and economic deprivation,<sup>14</sup> with calls to improve the effectiveness of behaviour change  
56  
57 interventions for low-income groups.<sup>15</sup> There is a clear need for effective public health  
58  
59  
60

1 programmes that can be refined according to local need. This evaluation focuses on  
2 Northumberland, in northeast England. Northumberland is one of the lowest ranked counties  
3 in England by Gross Value Added per capita (£16,140).<sup>16</sup> Unemployment is higher (5.5%  
4 versus 4.8%) than the England average<sup>17</sup> and Northumberland public health spend per person  
5 is £53, compared to a £59 national average.<sup>18</sup> 63.8% of adults are classified as having excess  
6 weight, higher than the national average of 61.3%.<sup>19</sup>

7  
8 The need for innovation within public health has been postulated, shifting away from the  
9 traditional linear pre-conceived and evidence-based model.<sup>20</sup> Parry and colleagues<sup>21</sup> highlight  
10 a need to explore how a programme works, but also the context and requirements for any  
11 adaptations. One such approach is prototyping<sup>22</sup> where projects test innovations iteratively,  
12 with ongoing refinement considering the interplay between a programme and its delivery  
13 context. Evaluation and public health teams are able to communicate at all stages of the  
14 programme, with evaluation recommendations incorporated via a rapid-cycle basis<sup>21</sup>. A small  
15 number of studies to date, for example in drug prevention<sup>22</sup> and web-based support of long-  
16 term weight loss<sup>23</sup> have demonstrated efficiencies (including time, adaptation to context and  
17 cost) when including elements of prototyping within programme development. Such an  
18 approach seems particularly well-suited to weight management, where there are many  
19 examples of ‘good’ practice, or effectiveness, but no clear consensus on ‘best’ practice at  
20 service-delivery level. There is also limited understanding of how ‘scaling up’ and adapting  
21 of programmes or interventions to local contexts may impact on effectiveness. This  
22 evaluation has particular value therefore in testing a prototyping approach for a weight  
23 management programme, delivered and adapted ‘in real-time’, at local authority level.  
24 The aim was to explore implementation of an ‘off-the-shelf’ weight management programme,  
25 Momenta<sup>24</sup>, in a challenging context. Specific objectives were to identify preliminary

1  
2  
3 1 programme effectiveness, explore local implementation, and consider feasibility of the  
4  
5 2 iterative prototyping evaluation framework.  
6  
7  
8 3

## 10 4 **METHODS**

### 15 6 **The prototyping process: local context and evaluation design**

17 7  
18  
19 8 A local authority health needs assessment identified a gap in provision for a lifestyle-based  
20  
21 9 weight management referral programme within Northumberland. Adults with overweight or  
22  
23 10 obesity were at the time eligible for referral to the Northumberland exercise referral scheme  
24  
25 11 (ERS), however previous evaluation demonstrated modest weight loss<sup>25</sup> and body mass index  
26  
27 12 (BMI) >30 kg/m<sup>2</sup> was negatively associated with adherence.<sup>26</sup> Thus ‘Momenta’ was  
28  
29 13 commissioned for local adaptation and delivery. Momenta is an outcome-driven programme  
30  
31 14 incorporating evidence-based behaviour change techniques, that is designed to be delivered  
32  
33 15 by fitness professionals in a leisure environment.<sup>24</sup> Developed by the MEND childhood  
34  
35 16 weight management programme<sup>27</sup> designers, this 12-week programme aims to facilitate  
36  
37 17 weight loss by engaging participants in 12 key behaviours broadly encompassing psychology,  
38  
39 18 diet and physical activity. Briefly, Momenta sessions explored topics using interactive and  
40  
41 19 experiential learning techniques including brainstorming, group activities and discussion,  
42  
43 20 quizzes and games. At the end of each session, participants set goals focusing on one of the  
44  
45 21 12 key behaviours. At the beginning of each session, the group discussed the previous weeks’  
46  
47 22 goals by exchanging stories and brainstorming challenges. All interventions were free to  
48  
49 23 service users.  
50  
51  
52  
53  
54  
55  
56 24

1 The local Leisure Trust was commissioned to deliver a pilot Momenta programme.  
2 Commissioners and providers had ideas about alternative delivery options and due to an  
3 established academic relationship, asked the study team for advice about robust evaluation  
4 that would allow for feedback in real time and at the end of the pilot. Stakeholder meetings  
5 were held with Public Health staff (n=2), Leisure Trust managers (n=3), delivery staff (n=2)  
6 and Momenta programme developers (n=2). As part of the prototyping process, members of  
7 the evaluation team (CDR, EO) provided guidance on evaluation design and light touch  
8 advice about tools to explore preliminary effectiveness. The evaluation was thus co-  
9 produced to ensure a robust framework, whilst meeting strategic local needs. For example,  
10 commissioners were concerned about meeting recruitment targets for an existing specialist  
11 weight management service used mainly for pre-bariatric patients and Momenta was initially  
12 commissioned for patients with BMI 25.0-29.9 kg/m<sup>2</sup>, although this was later amended.  
13 Furthermore, commissioners were keen to consider accessibility of provision and wished to  
14 explore offering free gym, swimming and fitness class membership. The evaluation was  
15 designed to accommodate this.

16  
17 The programme was delivered at two leisure sites situated within the 20% and 50% most  
18 deprived neighbourhoods in the country. Six General Practice (GP) surgeries, identified as  
19 the best referrers to the existing ERS, were asked to refer suitable patients to Momenta. The  
20 programme manager and the public health improvement manager (LN) attended practice  
21 meetings to articulate referral criteria and disseminate advertising materials. Attendance  
22 varied from two to all practice staff, meaning that in some surgeries knowledge of the  
23 programme was reliant on dissemination by those who attended.

24

1  
2  
3 1 A mixed methods evaluation was agreed between the evaluation team and commissioners.  
4  
5 2 Quantitative and qualitative components were conducted concurrently and had equal status.<sup>28</sup>  
6  
7  
8 3 Prototyping allowed for iterative changes to be made to the implementation and delivery of the  
9  
10 4 programme in real time. We reflect upon these in the results and discussion.  
11  
12  
13  
14

## 15 6 **Quantitative evaluation component**

16  
17 7

18  
19 8 Referrals by healthcare professionals (HCPs) were via a standardised form to the appropriate  
20  
21 9 leisure site. Programme providers allocated service users into one of three comparison  
22  
23  
24 10 groups:

- 25  
26 11 a) Combined Momenta plus fitness membership (Momenta-Fitness);  
27  
28 12 b) Momenta;  
29  
30 13 c) Fitness membership (Fitness only).  
31  
32

33 14 Participants were allocated into groups in order of receipt (the first referral form received was  
34  
35 15 allocated to Momenta-Fitness, the second form to Momenta, the third form to fitness only  
36  
37 16 etc.). The provider then contacted participants by telephone to arrange attendance. If a  
38  
39 17 participant was unable to attend the allocated group, (e.g. due to inconvenient session times)  
40  
41 18 provider allocated them to a different group after discussion. Due to maximum  
42  
43 19 recommended Momenta group size, referrals were split into delivery cohorts of 15, with  
44  
45 20 groups rolling through March 2015 to April 2016.  
46  
47  
48  
49  
50

51 22 Outcome measures included anthropometric measurements to determine weight change.

52  
53 23 Secondary well-being outcome measures were of specific interest to commissioners. Prior to  
54  
55 24 programme commencement the Leisure Trust, in conjunction with the Momenta programme  
56  
57 25 designer and members of the evaluation team, held a training day for delivery staff. Although  
58  
59  
60

1 staff were qualified to deliver Momenta, extra bespoke training (including role-play scenarios  
2 and problem-solving discussions) was delivered by the clinical psychologist who designed  
3 Momenta. The evaluation team (CDR, CH) trained delivery staff in international standard  
4 anthropometric techniques<sup>29</sup> and familiarised them with other evaluation measures.  
5  
6 Age, gender and postcode (for index of multiple deprivation, IMD) were recorded by  
7 referring HCPs on the referral form. Employment status, level of education, cohort wave and  
8 programme group were recorded by leisure staff, who also measured weight and stature  
9 (without shoes or bulky clothing) and waist circumference at baseline and programme end.  
10 Measures were taken in at least duplicate, using standardised tools in accordance with  
11 international standards<sup>29</sup> using SECA 761 scales, a Leicester portable stadiometer and  
12 anthropometry tape. Body mass index was calculated and classified according to WHO  
13 guidelines.<sup>30</sup> The Warwick-Edinburgh Mental Well-being Scale,<sup>31</sup> and the Hospital Anxiety  
14 and Depression Scale<sup>32</sup> were administered at each time-point. Attendance at Momenta and  
15 leisure centre usage was monitored via swipe-card tracking. 52 weeks after commencing the  
16 programme, participants were invited to attend a follow-up session, where leisure staff  
17 repeated physiological and psychological measures. Programme providers collected and  
18 collated quantitative data and provided an anonymised dataset to the evaluation team for  
19 analysis.

## 21 **Qualitative evaluation component**

23 Implementation effectiveness for the referral process was explored through semi-structured  
24 interviews with referring HCPs (undertaken at referring surgeries) and focus groups with  
25 service users (in leisure centres). All were conducted by LN during March-July 2015, as part



1 of her Public Health Masters degree (which contained qualitative methods training), mentored  
2 by TF, an experienced qualitative researcher. Questions are included in supplementary file 1.  
3 Data were audio-recorded. Results are reported using the Consolidated criteria for Reporting  
4 Qualitative research guidelines<sup>33</sup>

5  
6 Practice managers from all six referring surgeries were sent an invitation for staff to take part  
7 (n = 84), (General Practitioner = 53, Practice Nurse = 18, Health Care Assistant = 13).  
8 Individual correspondence was sent to those agreeing. Interviews aimed to explore HCPs'  
9 referral experiences; raising weight issues; assessing readiness to change; marketing and  
10 referral materials; and the referral process. Interview questions were pilot tested with public  
11 health colleagues to assess timing and ensure validity. One question (*Thinking about after*  
12 *you referred the patient, what happened next?*) was omitted after piloting as it was realised  
13 HCPs would not have had patient feedback at that point. Interviews lasted on average 26  
14 minutes and were transcribed verbatim. Data were analysed following each interview, with  
15 developing themes considered to determine whether questions required refinement. Initial  
16 themes generated from the first two interviews did not change and thus questions remained  
17 constant, although prompts were added.

18  
19 During the initial assessment session for the first wave of referrals, all (n = 39) were invited  
20 to participate in a series of focus groups at programme-end to explore experiences. Emphasis  
21 was placed on the referral process, initial expectations and experiences of participation; how  
22 weight issues were raised by HCPs; time from referral to initial assessment; and facilitators  
23 and barriers to taking part. Focus groups lasted between 26 and 44 minutes.

## 24 25 **Patient and public involvement**

1 Data from deliverers and service users, along with direct input from commissioners, fed into  
2 the iterative evaluation.

3

#### 4 **Data analyses**

5

6 The anonymised quantitative dataset was analysed using PSAW Statistics V.22. Descriptive  
7 statistics were calculated for age, gender, IMD, employment status, initial BMI, leisure site,  
8 level of education, and uptake and adherence. Distribution and normality of measures  
9 (weight, BMI, waist circumference, psychological wellbeing and attendance) were assessed  
10 using Shapiro Wilk tests and median and interquartile range (IQR) scores calculated for each  
11 group at baseline and 12 weeks (attendance, 12 weeks only). Using complete cases, Kruskal-  
12 Wallis H tests were used to determine between-group differences at baseline and at 12 weeks  
13 and Wilcoxon-signed rank tests examined repeated measures differences between baseline  
14 and 12-week scores. Complete cases available at 52 weeks ( $n = 37$ ) were considered  
15 similarly, but via separate analyses due to limited available data across the comparison  
16 groups.

17

18 Qualitative data were audio-recorded and transcribed by LN using a thematic process.<sup>34</sup> Data  
19 were organised according to concepts, key themes and developing categories. Data coding  
20 was discussed with TF, allowing comparison of data interpretation and subsequent coding  
21 refinement. Evolving key themes were refined through the analysis process and subsequent  
22 cross-sectional thematic labelling of data, thus generating deeper understanding. Where  
23 possible, key phrases or expressions identified from interviews and focus groups were  
24 retained within coding and thematic labelling. A public health colleague helped to verify

1  
2  
3 1 interpretations of the data and appropriateness of codes applied. Once initial interviews were  
4  
5 2 coded this framework was applied to remaining data. Notes taken during focus groups helped  
6  
7  
8 3 to contextualise when developing themes and included information about dynamics within  
9  
10 4 groups, such as influence, disagreement, humour and peer exposure.  
11  
12  
13  
14

## 15 6 **RESULTS**

16  
17 7  
18  
19 8 Between December 2014 and March 2016, the programme received 182 referrals and was  
20  
21 9 delivered in four cohorts across leisure sites. Due to initial low levels of recruitment, the first  
22  
23  
24 10 cohort did not start until March 2015. Referrals were mainly female (83%) and 30.6% lived  
25  
26 11 in the 20% most deprived areas (table 1).  
27  
28  
29  
30  
31  
32  
33  
34  
35  
36  
37  
38  
39  
40  
41  
42  
43  
44  
45  
46  
47  
48  
49  
50  
51  
52  
53  
54  
55  
56  
57  
58  
59  
60

**Table 1. Demographic characteristics of referrals (n=165)**

|                                                       | Median   | IQR      |
|-------------------------------------------------------|----------|----------|
| <b>Age (years)</b>                                    | 53       | 24       |
| <b>Gender (n=167)</b>                                 | <b>n</b> | <b>%</b> |
| Male                                                  | 29       | 17.4%    |
| Female                                                | 138      | 82.6%    |
| <b>Initial BMI category (kg/m<sup>2</sup>, n=150)</b> |          |          |
| 25.0-29.9                                             | 40       | 26.7%    |
| 30.0-34.9                                             | 73       | 48.6%    |
| 35.0-39.9                                             | 27       | 18.0%    |
| ≥40.0                                                 | 10       | 6.7%     |
| <b>Leisure site (n=170)</b>                           |          |          |
| Leisure site 1 (IMD quintile 2)                       | 80       | 44.7%    |
| Leisure site 2 (IMD quintile 3)                       | 99       | 55.3%    |
| <b>Index of multiple deprivation (n=170)</b>          |          |          |
| 20% most deprived                                     | 52       | 30.6%    |
| 21-40%                                                | 41       | 24.1%    |
| 41-60%                                                | 20       | 11.8%    |
| 61-80%                                                | 20       | 11.8%    |
| 20% least deprived                                    | 37       | 21.6%    |
| <b>Employment status (n=123)</b>                      |          |          |
| Employed full time                                    | 37       | 30.1%    |
| Employed part time                                    | 24       | 19.5%    |
| Retired                                               | 51       | 41.5%    |
| Claiming incapacity benefit                           | 5        | 4.1%     |
| Claiming job seekers allowance                        | 6        | 4.9%     |
| <b>Level of education (n=127)</b>                     |          |          |
| Primary                                               | 15       | 11.8%    |
| Secondary (O level/GCSE)                              | 35       | 27.6%    |
| Secondary (A level)                                   | 26       | 20.5%    |
| Further education (HND)                               | 25       | 19.7%    |
| Bachelors or equivalent                               | 21       | 16.5%    |
| Masters or equivalent                                 | 5        | 3.9%     |

**Preliminary programme effectiveness**

Of all referrals, 153 (84%) attended the baseline measurement session and 78 (51% of those who started) attended the 12-week measurement session. Uptake and adherence varied by programme group (table 2).

1 **Table 2. Programme uptake, adherence and attendance.**

| <b>Uptake and adherence</b>        | <b>Momenta-Fitness</b> |                     | <b>Momenta only</b> |                     | <b>Fitness only</b> |                     |
|------------------------------------|------------------------|---------------------|---------------------|---------------------|---------------------|---------------------|
| Number referred                    |                        | 58                  |                     | 59                  |                     | 65                  |
| Uptake* (n, %)                     |                        | 54 (93.1%)          |                     | 50 (84.7%)          |                     | 49 (75.4%)          |
| Uptake retention** (n, %)          |                        | 35 (64.8%)          |                     | 27 (54.0%)          |                     | 16 (32.7%)          |
| Uptake adherence^ (n, %)           |                        | 34 (63.0%)          |                     | 26 (52.0%)          |                     | 8 (50.0%)           |
| Overall retention*** (n, %)        |                        | 35 (60.3%)          |                     | 27 (45.8%)          |                     | 16 (24.6%)          |
| Overall adherence^^ (n, %)         |                        | 34 (58.6%)          |                     | 26 (44.1%)          |                     | 8 (12.3%)           |
| <b>Momenta session attendance</b>  | <b>Momenta-Fitness</b> |                     | <b>Momenta only</b> |                     | <b>Fitness only</b> |                     |
|                                    | <b>n</b>               | <b>Median (IQR)</b> | <b>n</b>            | <b>Median (IQR)</b> |                     |                     |
| Uptake                             | 54                     | 9.0 (7.3)           | 50                  | 9.0 (8.0)           |                     |                     |
| Dropouts                           | 19                     | 3.0 (3.0)           | 23                  | 3.0 (5.0)           |                     | N/A                 |
| Completers^^^                      | 35                     | 10.0 (2.0)          | 27                  | 11.0 (1.3)          |                     |                     |
| <b>Exercise session attendance</b> | <b>Momenta-Fitness</b> |                     | <b>Momenta only</b> |                     | <b>Fitness only</b> |                     |
|                                    | <b>n</b>               | <b>Median (IQR)</b> | <b>n</b>            | <b>Median (IQR)</b> | <b>n</b>            | <b>Median (IQR)</b> |
| Uptake                             | 54                     | 7.0 (16.3)          | 50                  | 0.0 (4.5)           | 49                  | 0.0 (1.5)           |
| Dropouts                           | 19                     | 0.0 (1.0)           | 23                  | 0.0 (0.0)           | 33                  | 0.0 (0.0)           |
| Completers^^^                      | 35                     | 10.0 (14.0)         | 26                  | 0.0 (5.0)           | 16                  | 4.5 (18.0)          |

*Uptake\** participant attended baseline assessment; *Uptake retention\*\** % of participants who attended the baseline assessment who also attended the 12-week assessment; *Uptake adherence^* % of participants who attended the baseline assessment who also attended  $\geq 8$  Momenta sessions (Momenta-Fitness and Momenta only) or gym sessions (fitness only); *Overall retention\*\*\** % of all those referred who attended both baseline and 12-week assessment; *Overall adherence^^* % of all those referred who attended  $\geq 8$  Momenta sessions (Momenta-Fitness and Momenta only) or exercise sessions (fitness only); *Completers^^^* those who completed the 12-week assessment

3

4 Physiological and psychological data were not normally distributed. Quantitative findings are  
 5 presented as exploratory, due to the small sample size. No significant differences were found  
 6 between programme groups either at baseline or at 12 weeks, for any measures. Significant  
 7 within-group differences between baseline and 12 weeks were evident for weight, BMI and  
 8 waist circumference for Momenta-Fitness, and Momenta (Table 3). Follow-up analysis at 52-  
 9 weeks (available sub-sample) showed changes were maintained for Momenta-Fitness ( $n=18$ )  
 10 only.

11

12

13

1 **Table 3. Weight, BMI and waist circumference change.**

| <b>End of programme results</b> | <b>Median (IQR)<br/>Baseline</b> | <b>Median (IQR)<br/>12 weeks</b> | <b>z</b> | <b>p</b> | <b>Median (IQR)<br/>Change</b> |
|---------------------------------|----------------------------------|----------------------------------|----------|----------|--------------------------------|
| <b>Weight (kg)</b>              |                                  |                                  |          |          |                                |
| Momenta-Fitness (n=35)          | 88.9 (80.5 - 100.0)              | 88.0 (77.2 - 95.8)               | -4.531   | <0.001   | -2.9 (-5.1 - -1.6)             |
| Momenta only (n=26)             | 87.8 (74.5 - 77.0)               | 83.3 (74.5 - 92.5)               | -4.344   | <0.001   | -2.9 (-5.0 - -2.0)             |
| Fitness only (n=15)             | 76.2 (71.6 - 86.9)               | 76.6 (70.4 - 84.6)               | -0.879   | 0.379    | 0.0 (-3.2 - 1.0)               |
| <b>BMI (kg/m<sup>2</sup>)</b>   |                                  |                                  |          |          |                                |
| Momenta-Fitness (n=35)          | 32.0 (30.3 - 35.7)               | 31.3 (29.2 - 35.3)               | -4.494   | <0.001   | -1.1 (-1.9 - -0.6)             |
| Momenta only (n=26)             | 32.0 (30.0 - 34.5)               | 31.3 (28.6 - 33.6)               | -4.356   | <0.001   | -1.2 (-1.6 - -0.8)             |
| Fitness only (n=14)             | 29.2 (27.3 - 33.0)               | 29.7 (27.0 - 33.3)               | -0.454   | 0.650    | 0.1 (-1.2 - +0.4)              |
| <b>Waist circumference (cm)</b> |                                  |                                  |          |          |                                |
| Momenta-fitness (n=35)          | 106.0 (98.0 - 115.0)             | 99.0 (93.0 - 110.0)              | -4.996   | <0.001   | -7.0 (-9.5 - -5.0)             |
| Momenta only (n=25)             | 108.0 (99.5 - 114.5)             | 101.0 (93.8 - 111.5)             | -4.166   | <0.001   | -5.0 (-7.3 - -2.5)             |
| Fitness only (n=11)             | 90.0 (87.0 - 95.0)               | 91.0 (90.0 - 96.0)               | 0.358    | 0.650    | 1.0 (-3.0 - 3.0)               |
| <b>52-week follow-up</b>        | <b>Median (IQR)<br/>Baseline</b> | <b>Median (IQR)<br/>52 weeks</b> | <b>z</b> | <b>p</b> | <b>Median (IQR)<br/>Change</b> |
| <b>Weight (kg)</b>              |                                  |                                  |          |          |                                |
| Momenta-Fitness (n=18)          | 95.2 (87.1 - 101.4)              | 91.4 (82.7 - 95.9)               | -3.006   | <0.001   | -4.8 (-6.2 - -1.5)             |
| Momenta only (n=16)             | 84.7 (72.3 - 95.2)               | 82.7 (73.2 - 94.6)               | -1.533   | 0.120    | -0.7 (-7.6 - 0.8)              |
| *Fitness only (n=3)             | 73.4 (69.5 - 80.2)               | 70.3 (66.0 - 87.0)               |          |          | 0.9 (-7.4 - 6.9)               |
| <b>BMI (kg/m<sup>2</sup>)</b>   |                                  |                                  |          |          |                                |
| Momenta-Fitness (n=18)          | 32.0 (30.49 - 35.1)              | 30.8 (28.7 - 34.0)               | -3.157   | <0.05    | -1.7 (-2.0 - -0.6)             |
| Momenta only (n=16)             | 31.7 (29.3 - 33.9)               | 31.1 (26.7 - 33.6)               | -1.603   | 0.109    | -0.3 (-2.3 - 0.3)              |
| *Fitness only (n=3)             | 27.6 (27.5 - 30.5)               | 27.8 (24.8 - 33.2)               |          |          | 0.3 (24.8 - 33.2)              |
| <b>Waist circumference (cm)</b> |                                  |                                  |          |          |                                |
| Momenta-Fitness (n=18)          | 109.0 (101.0 - 114.8)            | 100.5 (94.8 - 107.3)             | -3.221   | <0.001   | -6.0 (-13.3 - -1.75)           |
| Momenta only (n=16)             | 106.0 (94.5 - 115.8)             | 103.5 (98.5 - 113.3)             | -0.780   | 0.938    | -2.5 (-9.0 - -10.0)            |
| *Fitness only (n=3)             | 89.0 (87.0 - 95.0)               | 90.0 (90.0 - 101.0)              |          |          | 3.0 (90.0 - 101.0)             |

\* Fitness only n=3 therefore median and range reported and no statistical test completed.

3  
4  
5  
6  
7  
8  
9  
10  
Significant improvement in mental wellbeing, and reductions in depression and anxiety, were evident between baseline and 12 weeks for Momenta-Fitness, and Momenta (Table 4). The magnitude of change was relatively small but functionally and clinically meaningful. For example, the median value for anxiety for Momenta dropped from a moderate symptomology to a not symptomatic classification. 52-week sub-sample analysis showed that significant improvements for wellbeing and depression were maintained for Momenta-Fitness (n=18), and wellbeing and anxiety for Momenta (n=16).

**Table 4. Wellbeing, anxiety and depression measures change.**

| <b>End of programme results</b> | <b>Median (IQR)<br/>Baseline</b> | <b>Median (IQR)<br/>12 weeks</b> | <b>z</b> | <b>p</b> | <b>Median (IQR)<br/>Change</b> |
|---------------------------------|----------------------------------|----------------------------------|----------|----------|--------------------------------|
| <b>Mental wellbeing scale</b>   |                                  |                                  |          |          |                                |
| Momenta-Fitness (n=29)          | 46.0 (40.0 - 51.5)               | 53.0 (40.0 - 51.5)               | 3.810    | <0.001   | 5.0 (1.5 - 12.0)               |
| Momenta only (n=23)             | 49.0 (39.0 - 58.0)               | 55.0 (51.0 - 63.0)               | 2.818    | <0.05    | 6.0 (-1.0 - 10.0)              |
| Fitness only (n=13)             | 47.0 (40.5 - 59.5)               | 46.0 (42.0 - 63.5)               | 0.157    | 0.875    | 0.0 (-4.0 - 5.0)               |
| <b>Anxiety scale</b>            |                                  |                                  |          |          |                                |
| Momenta-Fitness (n=28)          | 5.5 (4.0 - 9.8)                  | 4.5 (2.0 - 7.0)                  | -3.027   | <0.001   | -1.0 (-3.0 - 1.0)              |
| Momenta only (n=23)             | 8.0 (6.0 - 10.0)                 | 4.0 (2.5 - 9.0)                  | -2.329   | <0.05    | -1.0 (-3.0 - 0.0)              |
| Fitness only (n=13)             | 8.0 (3.5 - 10.0)                 | 6.0 (4.0 - 9.0)                  | -0.499   | 0.618    | -1.0 (-2.0 - 2.0)              |
| <b>Depression scale</b>         |                                  |                                  |          |          |                                |
| Momenta-Fitness (n=28)          | 5.5 (3.3 - 8.0)                  | 2.0 (1.0 - 6.0)                  | -3.214   | <0.05    | -2.5 (-4.8 - -0.3)             |
| Momenta only (n=23)             | 5.0 (3.0 - 7.5)                  | 3.0 (1.0 - 5.0)                  | -3.049   | <0.05    | -1.0 (-4.5 - 1.0)              |
| Fitness only (n=13)             | 4.0 (2.0 - 8.5)                  | 2.0 (2.0 - 7.0)                  | -1.226   | 0.220    | -2.0 (-4.5 - 0.0)              |
| <b>52-week follow-up</b>        | <b>Median (IQR)<br/>Baseline</b> | <b>Median (IQR)<br/>52 weeks</b> | <b>z</b> | <b>p</b> | <b>Median (IQR)<br/>Change</b> |
| <b>Mental wellbeing scale</b>   |                                  |                                  |          |          |                                |
| Momenta-Fitness (n=15)          | 44.0 (39.0 - 52.0)               | 55.0 (48.0 - 59.0)               | 2.984    | <0.05    | 5.0 (3.0 - 15.0)               |
| Momenta only (n=13)             | 58.0 (47.5 - 59.0)               | 56.0 (54.0 - 63.5)               | 2.282    | <0.05    | 4.0 (0.5 - 6.5)                |
| *Fitness only (n=3)             | 47.0 (34.0 - 64.0)               | 58.0 (45.0 - 60.0)               |          |          | -2.0 (-6.0 - 26.0)             |
| <b>Anxiety scale</b>            |                                  |                                  |          |          |                                |
| Momenta-Fitness (n=15)          | 6.0 (2.0 - 10.0)                 | 2.0 (1.0 - 7.0)                  | -1.785   | 0.074    | -3.0 (-6.0 - 0.0)              |
| Momenta only (n=15)             | 7.0 (4.0 - 9.0)                  | 5.0 (1.0 - 8.0)                  | -1.990   | <0.05    | -3.0 (-4.0 - 0.0)              |
| *Fitness only (n=3)             | 9.0 (5.0 - 10.0)                 | 2.0 (1.0 - 8.0)                  |          |          | -3.0 (-8.00 - -2.0)            |
| <b>Depression scale</b>         |                                  |                                  |          |          |                                |
| Momenta-Fitness (n=15)          | 7.0 (3.3 - 11.3)                 | 3.5 (1.0 - 6.0)                  | -2.908   | <0.05    | -3.5 (-6.3 - -0.8)             |
| Momenta only (n=15)             | 4.0 (1.0 - 6.0)                  | 3.0 (1.0 - 4.0)                  | -0.762   | 0.446    | 0.0 (-2.0 - 1.0)               |
| *Fitness only (n=3)             | 3.0 (0.0 - 8.0)                  | 2.0 (1.0 - 8.0)                  |          |          | 1.0 (-8.0 - 5.0)               |

\* Fitness only n=3 therefore median and range reported and no statistical test completed.

Overall, the results suggested those who participated in the two groups incorporating Momenta, had enhanced physical and psychological health indicators from baseline, whereas those who had only free fitness membership did not. There is some evidence, for a small follow-up sample, that the combination of Momenta and fitness membership produces the best outcomes at 52 weeks.

## 1 **Implementation effectiveness: reflections from referring healthcare professionals**

2

3 Five face-to-face semi-structured interviews took place with HCPs across five referring  
4 surgeries: two GPs, two Practice Nurses and one Health Care Assistant. HCPs perceived that  
5 four key themes influenced the effectiveness of programme implementation: (i) difficulties  
6 raising weight with patients, (ii) how gender affected patient engagement, (iii) availability of  
7 information and resources, and (iv) additional barriers constraining programme promotion.

8

9 Raising the issue of weight with patients:

10

11 Concerns about raising weight may have contributed to slow recruitment, with nurses and  
12 healthcare assistants expressing unease, *'not really up to me... well I talk about it if they want*  
13 *to.... Better if they [patients] bring it up.'* (Interview 2, Healthcare Assistant). GPs seemed  
14 more comfortable raising weight with patients, but with the caveat that this is easier in the  
15 context of a longer-term GP/patient relationship.

16

17 *'the people I see I've known for a very long time... it's the rapport you have...if I'd*  
18 *never met anyone before and they came in for a sore throat I'm not going to say*  
19 *you're fat...If there was someone I'd known for a long time and it seemed*  
20 *relevant...I'd mention it.'* (Interview 5, GP).

21

22 Gender and engagement in the referral process:

23

24 Gender was highlighted as influencing the referral process, women being more likely than  
25 men to seek support for weight. This may help explain the low rate of referral for males  
(17%):

26



1  
2  
3 1 *'More women talk about it...men don't really talk about weight...I do mention weight*  
4  
5 2 *to men if I'm doing a well man [sic] but it doesn't come up really...it's a woman*  
6  
7 3 *thing...'* (Interview 3, Practice Nurse).  
8  
9

10 4  
11  
12  
13 5 Availability of information and resources:  
14  
15 6

16  
17 7 Several interviewees highlighted training needs around programme information and  
18  
19 8 resources, (e.g., additional programme information would help to engage patients). For  
20  
21 9 example, the GPs both discussed the longstanding ERS and stated they needed to become  
22  
23 10 more familiar with Momenta, as they had with the ERS:  
24  
25

26 11 *'when we get opportunities to do things in the practice we normally discuss it, let*  
27  
28 12 *everyone know where appropriate forms and information is and it's in your*  
29  
30 13 *head...that didn't happen with this and I don't know why that was.'* (Interview 5, GP).  
31  
32  
33  
34  
35

36 15 All HCPs interviewed felt the referral leaflet (provided by programme providers) was  
37  
38 16 important in the process, either as a tool to promote the intervention or to convey information  
39  
40 17 to patients:  
41  
42

43 18 *'The leaflet was good, bright...explained the programme and patients like taking a*  
44  
45 19 *leaflet away.'* (Interview 3, Practice Nurse)  
46  
47  
48  
49  
50  
51

52 21 Additional Barriers to Engagement:  
53  
54  
55  
56  
57  
58  
59  
60

1  
2  
3 1 Several sub-themes highlighted additional barriers to the referral process. The most  
4  
5 2 prominent sub-themes were around initial BMI referral criteria (25.0-29.9 kg/m<sup>2</sup>) and delayed  
6  
7 3 programme start. Both implementation factors were beyond the control of the referrers, but  
8  
9 4 consequently amended through iterative refinement during the prototyping process following  
10  
11 5 early data analysis. Both were reported by practice nurses as exacerbating each other:

12  
13  
14 6 *‘we were referring but then it didn’t start so people were not sure what was*  
15  
16 7 *happening [pause]...Think it was more people were needed to start...but you know if*  
17  
18 8 *the BMI was higher then there would have been more.’* (Interview 3, Practice Nurse).  
19  
20  
21 9

22  
23  
24 10 In one case, a decision was taken to relax the referral criteria, *‘...31.5 [kg/m<sup>2</sup>]...was just*  
25  
26 11 *outside so I just referred him.’* (Interview 4, GP).  
27  
28 12

29  
30  
31 13 Programme location was perceived by HCPs to overcome an existing barrier to the tier three  
32  
33 14 weight management programme, as Momenta was *‘round the corner for people,’* as opposed  
34  
35 15 to *‘a bit far away at the hospital.’* Cost barriers were also discussed, both with reference to  
36  
37 16 the patient, *‘in this sort of area...cost..., if you’ve got to pay it’s a barrier.’* (Interview 4, GP),  
38  
39 17 and to expected targets from Clinical Commissioning Groups (CCG),

40  
41  
42 18 *‘we are constantly told by the CCG that we must keep down on numbers and that if*  
43  
44 19 *there are costs attached to this referral that would definitely impact... and that would*  
45  
46 20 *be for all practices.’* (Interview 5, GP)  
47  
48  
49 21

## 22 **Implementation effectiveness: reflections from participants**

23

24  
25 24 Three focus groups allowed programme participant voices to be heard: three females and one  
26  
27 25 male from Momenta (focus group 1), three males and three females from Momenta-Fitness  
28  
29  
30

1 (focus group 2) and three females (one of whom emailed her views separately) from Fitness-  
2 only. Across the groups, 12 participants reported having lost weight and one reported weight  
3 gain. Three themes developed: (i) outcomes of the programme, (ii) facilitators and barriers to  
4 engagement, and (iii) raising the issues of weight with HCPs.

5  
6 Outcomes of the programme:

7  
8 Focus group findings aligned closely with quantitative outcomes in terms of the physical and  
9 psychological benefits of participation: *'[I've] lost a good bit of weight. It's been very*  
10 *positive for me... I'm feeling a lot more active...'* (Momenta-Fitness, Participant 5).  
11 Participants reported a sense of weight loss achievement, increased physical activity levels,  
12 and positive mood states. In addition, elements of the Momenta programme were perceived  
13 as facilitating engagement, including the *'group feeling... I looked forward to it,'* (Momenta-  
14 Fitness, Participant 4), the *'information that we got every week... so very well planned.'*  
15 (Momenta-Fitness, Participant 3) and the ongoing support e.g., *'she phoned me the other day*  
16 *to see if I was coming,'* (Momenta-Fitness, Participant 4). Momenta participants reflected  
17 back on, and identified and discussed lifestyle factors that related to their initial weight gain  
18 (e.g., *'I did the usual thing... I started eating toffees,'* Momenta-Fitness, Participant 5),  
19 demonstrating both self-awareness and an openness to discussing the topic.

20  
21 Facilitators and barriers to engagement:

22  
23 One participant reported being initially excluded but later allowed to take part, and others  
24 raised concerns that the initial BMI threshold for referral (25-29.9 kg/m<sup>2</sup>) was too low, *'was a*  
25 *little bit high, BMI...managed to get it down... [and then] the doctor put us forward,'*

1 (Momenta, Participant 2). Data also indicated the importance of subsidised access,  
2 particularly important in the context of a deprived region such as this, e.g., *'I also joined*  
3 *Weight Watchers for short period of time but found the classes too expensive,*' (Fitness-only,  
4 Participant 3, emailed response).

5  
6 Raising the issue of weight with HCPs:

7  
8 Some data did suggest implementation was problematic, however, this focused exclusively  
9 on the referral process. Participants overwhelmingly felt that they had opened the  
10 conversation about weight, as opposed to discussions being initiated by HCPs (e.g., *'my*  
11 *glucose levels were quite high but nobody ever said that I was overweight,*' Momenta-  
12 Fitness, Participant 4). In addition, participants perceived limitations in HCPs' knowledge of  
13 intervention components (*'she [nurse] didn't know anything about it,*' Fitness-only,  
14 Participant 1), something with potential to impact on likelihood of referral, and  
15 participants' expectations of programme success.

### 16 17 **Iterative refinements throughout the evaluation process**

18  
19 Here we list a number of implementation adjustments which were made throughout the  
20 evaluation process, facilitated via the prototyping framework. Real-time advice from  
21 Commissioners was considered during early stages of implementation, regarding the nature  
22 of comparison offers (e.g. fitness access) and thus initial design and outcome measurements  
23 were adapted prior to referrals being made. To better-target recruitment and change the  
24 process of engagement at referral point, entry criteria were altered ( $BMI \geq 30 \text{ kg/m}^2$ ) mid-way  
25 through programme delivery. On-site implementation of the service offer was adapted in

1  
2  
3 1 response to delivery staff feedback: increased resource was made available, for example  
4  
5 2 additional staffing to support delivery for the first wave of referrals. Furthermore, staff were  
6  
7 3 given additional time for Momenta session preparation and session delivery times were  
8  
9 4 extended. Follow-up activities (i.e., text or telephone contact) were implemented by staff  
10  
11 5 during the process, to encourage adherence.  
12  
13  
14  
15  
16

## 17 7 **DISCUSSION**

18  
19 8  
20  
21 9 We explored ‘prototyping’, as a cost-effective and time-efficient approach to public health  
22  
23 10 evaluation, via an ‘off-the-shelf’ weight management programme implemented in a local  
24  
25 11 context of mixed and high deprivation. Quantitative findings should be interpreted as  
26  
27 12 exploratory, due to the relatively small number of complete cases, however lessons can be  
28  
29 13 learned from these data both in terms of preliminary outcomes and engagement/dropout.  
30  
31 14 Participation in Momenta and Momenta-Fitness resulted in 12-week weight loss for those  
32  
33 15 who completed the programme. Free fitness membership without the weight-management  
34  
35 16 programme was poorly engaged with and did not lead to weight change. A small sub-sample  
36  
37 17 who attended follow-up demonstrated that after one year, weight reductions equivalent to  
38  
39 18 ~4% could be maintained for Momenta-Fitness. We caution that this might be best  
40  
41 19 interpreted as hypothesis-generating for future evaluations, given the small number of  
42  
43 20 available cases, however we will consider potential mechanisms here. Providing free access  
44  
45 21 to fitness facilities alongside the behaviour change programme may allow for continuous and  
46  
47 22 self-driven behaviour change<sup>35</sup> and sustaining optimal changes in adiposity over 12 months in  
48  
49 23 those who remained engaged.<sup>36</sup> Swipe card monitoring during the initial 12-week period  
50  
51 24 indicated that fitness sessions were accessed an average 10 occasions for this group, whereas  
52  
53 25 no access was apparent for Momenta, despite Momenta sessions being held in leisure centres.  
54  
55  
56  
57  
58  
59  
60

1 This could be important for community providers making decisions about delivery location.  
2 Both Momenta groups reported improved wellbeing, and reduced anxiety and depression at  
3 12-weeks suggesting that the behavioural intervention may drive this effect. This is consistent  
4 with previous work reporting co-varying changes in weight loss, depression, and quality of  
5 life in weight management services.<sup>37</sup> It is unclear whether the primary mechanism was  
6 weight loss, or the wider social benefits of participation. Both were valued in the qualitative  
7 data. Our preliminary evidence of maintained improvements in wellbeing for these groups at  
8 52 weeks is particularly relevant given previously evidenced associations between poor  
9 mental health, and obesity and overweight status.<sup>38</sup>

10  
11 Experiences of both referrers and referrals highlighted that HCPs needed to be better-  
12 informed and more confident raising weight-related conversations. Whilst patient-led action  
13 is desirable, staff reluctance to raise weight issues may mean that opportunities for  
14 engagement of less knowledgeable or motivated patients will be missed. The problematic  
15 positioning of GPs within obesity care has been highlighted previously,<sup>39</sup> with a range of  
16 strategies to change HCPs' behaviour resulting in little or no change to patients' weight. A  
17 practical training need is highlighted for those working at the patient-practitioner interface,  
18 however communication with patients about weight may well be hindered by the 'stigma'  
19 attached to obesity.<sup>40</sup> This has wider implications for patient outcomes and requires further  
20 exploration through the implementation process. Additionally, HPCs need better  
21 understanding of referral-based public health programmes offered. Despite efforts of  
22 programme and public health managers, awareness was reportedly low for some referring  
23 professionals. We suggest consideration of resource-efficient ways to signpost both HPCs  
24 and patients themselves as part of the implementation process.

25

1  
2  
3 1 This programme was delivered across a social gradient in a region with low health indices  
4  
5 2 and areas of high deprivation. Some issues in relation to inequalities and service access for  
6  
7 3 future community-based weight management programmes were highlighted. Only 17% of  
8  
9 4 referrals to Momenta were males. Gender bias in weight management referral has been  
10  
11 5 reported elsewhere,<sup>41-42</sup> and interviews showed that practitioners struggled to raise the topic  
12  
13 6 of weight with male patients. Alternative referral strategies have been employed in other  
14  
15 7 settings in an attempt to overcome this.<sup>43</sup> Marketing in other community spaces, or targeted  
16  
17 8 postal referrals could be explored in future implementation. The initial decision to restrict  
18  
19 9 referral to overweight-only substantially impacted on referral rates, with HCPs and referrals  
20  
21 10 indicating they felt limited until this restriction was reversed. Had this continued, worsening  
22  
23 11 health inequalities may have been an unintended consequence, something to be actively  
24  
25 12 avoided within public health programmes <sup>44</sup>. The roles of, and interactions between, those  
26  
27 13 operating in the 'system' (i.e. the context within which the intervention operates) must be  
28  
29 14 considered at the point of implementation to minimise any impact from unintended  
30  
31 15 consequences.<sup>5</sup> In practical terms, this may be through continued dialogue with  
32  
33 16 commissioners, referring professionals and referrals themselves, something which  
34  
35 17 prototyping evaluation allows.  
36  
37  
38  
39  
40  
41  
42  
43  
44

45 19 Given that no systematic problems emerged with participants' experiences of the programme  
46  
47 20 itself, our findings lend support to a streamlined approach to involvement of all stakeholders  
48  
49 21 in programme implementation. We suggest that prototyping demonstrates opportunities for  
50  
51 22 off-the-shelf programmes to be pragmatically moulded to local context, in real-time. Many of  
52  
53 23 the iterative changes made were staff-driven. This demonstrates that real-time consideration  
54  
55 24 of feedback from on-site delivery teams can be important to the implementation process.  
56  
57 25 Some of the adjustments required commissioning action, as they had resource implications;  
58  
59  
60

1 others needed advice from the evaluation team. Interestingly changes made throughout the  
2 process generally focused on both staff and participant experience.

3  
4  
5  
6  
7  
8  
9  
10 Emergence of some negative experiences of referral suggests, however, that prototyping can  
11 be problematic without networks or channels for ensuring key outcomes are widely  
12 communicated to relevant stakeholders. Overall, the evaluation demonstrated that a balance is  
13 needed to allow quick and efficient adaptation of off-the-shelf programmes, but with focused  
14 professional user engagement in the early stages of development. The prototyping approach  
15 had particular utility given that project resources were limited and meant that issues were  
16 identified and acted upon rapidly. While the programme may have progressed similarly  
17 without this, prototyping provided a greater structure for, and confidence in, on-going  
18 refinements. This was achieved via the support provided by academics, public health  
19 practitioners and providers. Fundamentally, adopting a prototyping approach enabled the  
20 delivery of a new service to an in-need population, alongside the generation of initial  
21 evidence of local effectiveness. A minimum of 1 kg weight-loss at 3 months, and 0.7 kg at  
22 12-months have been suggested as thresholds to influence decisions over commissioning of  
23 weight-loss services.<sup>45</sup> Our preliminary data shows that Momenta met and indeed exceeded  
24 these and shows particular promise when implemented in conjunction with free fitness  
25 provision.

26  
27  
28  
29  
30  
31  
32  
33  
34  
35  
36  
37  
38  
39  
40  
41  
42  
43  
44  
45  
46  
47  
48  
49 Demonstrating preliminary effectiveness is of limited use, however, unless a successful  
50 programme in one area may be adapted and implemented to suit a different context, for  
51 example through sharing local-level knowledge, interactions and behaviours of individuals  
52 within different parts of that system.<sup>46</sup> The process for scaling-up of effective health  
53 interventions to broader policy and practice takes years<sup>47</sup> and certainly within the obesity  
54  
55  
56  
57  
58  
59  
60



1 literature, has been dominated by initiatives that consider effectiveness but not  
2  
3 implementation across specific settings.<sup>48-49</sup> We recommend prototyping might be built into  
4  
5 larger public health evaluations providing that the original programme has a sound theoretical  
6  
7  
8 basis, and iterative refinement is engaged with by all stakeholders from the outset.  
9  
10  
11  
12  
13

## 14 **CONCLUSION**

15  
16  
17  
18  
19 We demonstrate good preliminary outcome effectiveness for ‘Momenta’, particularly in  
20  
21 conjunction with a free fitness offer. The programme was experienced positively by those  
22  
23 who attended. Issues with the referral process need to be explored further, however other  
24  
25 refinements were feasible during delivery. This evaluation extends the literature by exploring  
26  
27 prototyping for a complex problem, community weight-management, in a challenging setting,  
28  
29 demonstrating streamlined implementation of an ‘off-the-shelf’ weight management  
30  
31 programme. This resource-effective approach is highly relevant in the context of health  
32  
33 inequalities and public health sector funding constraints.  
34  
35  
36  
37  
38  
39  
40  
41

42 **Acknowledgements:** Many thanks to Jordan Bell, Nicole Rowley and Ross Davison, who  
43  
44 collected and collated raw quantitative data.  
45  
46  
47  
48  
49

50 **Author Contributions:** CDR, CH and EO contributed to design of the quantitative  
51  
52 evaluation, data analysis and preparation the final document. LN contributed to design and  
53  
54 analyses of the qualitative evaluation component. TF contributed to qualitative design and  
55  
56 analysis and preparation of the final document. AL contributed to design of the quantitative  
57  
58 evaluation and preparation of the final document.  
59  
60

1

2  
3  
4  
5  
6  
7  
8  
9  
10  
11  
12  
13  
14  
15  
16  
17  
18  
19  
20  
21  
22  
23  
24  
25  
26  
27  
28  
29  
30  
31  
32  
33  
34  
35  
36  
37  
38  
39  
40  
41  
42  
43  
44  
45  
46  
47  
48  
49  
50  
51  
52  
53  
54  
55  
56  
57  
58  
59  
60

1  
2 **Funding:** The quantitative evaluation component was supported by funding from the  
3 Wolfson Research Institute for Health and Wellbeing, Durham University. Amelia Lake is a  
4 member of Fuse, the Centre for Translational Research in Public Health ([www.fuse.ac.uk](http://www.fuse.ac.uk)).  
5 Fuse is a UK Clinical Research Collaboration (UKCRC) Public Health Research Centre of  
6 Excellence. Funding for Fuse from the British Heart Foundation, Cancer Research UK,  
7 Economic and Social Research Council, Medical Research Council, the National Institute for  
8 Health Research, under the auspices of the UKCRC, is gratefully acknowledged. The views  
9 expressed in this paper do not necessarily represent those of the funders or UKCRC. The  
10 funders had no role in study design, data collection and analysis, decision to publish, or  
11 preparation of the manuscript.

12

13 **Competing interests:** CH is a former employee of the Leisure Trust and was instrumental in  
14 initiating the evaluation. She was subsequently employed as a research assistant at Durham  
15 University, however was not involved in any data collection or entry, only accessing an  
16 anonymised database submitted to the University. LN was a Public Health Improvement  
17 Manager within the Public Health Team and had responsibility for commissioning the  
18 Momenta programme. The qualitative evaluation component was submitted in partial  
19 fulfilment of her Masters in Public Health at Newcastle University.

20

21 **Participant consent:** Consent was obtained for face-to-face interviews and focus groups.  
22 Service users were informed in writing of the nature of the quantitative service evaluation and  
23 how to withdraw from it. The presented data are anonymised with risk of identification low.

24

1  
2  
3 1 **Ethics approval:** Ethical advice was sought from the local Research Manager of North of  
4  
5 2 England Commissioning Support, and this project was classed as a service evaluation in line  
6  
7 3 with National Research Ethics Service guidance.  
8  
9 4

10  
11  
12  
13 5 **Data availability statement:** No additional data are available because this was a service  
14  
15 6 evaluation.  
16  
17  
18  
19 7

For peer review only

1  
2  
3 **1 REFERENCES**  
4  
5 2  
6 3  
7 4

- 8 1. Haines A, Kuruvilla S, Borchert M. Bridging the implementation gap between knowledge  
9 and action for health. (Theme Papers). *Bull World Health Organ* 2004;82:724.  
10  
11  
12  
13 6 2. Curran GM, Bauer M, Mittman B, *et al.* Effectiveness-implementation Hybrid Designs:  
14 Combining Elements of Clinical Effectiveness and Implementation Research to Enhance  
15 Public Health Impact. *Med Care* 2012;50:217-26.  
16 7  
17  
18 8  
19  
20  
21  
22 9 3. Sales A, Smith J, Curran G, *et al.* Models, Strategies, and Tools: Theory in Implementing  
23 Evidence-Based Findings into Health Care Practice. *J Gen Int Med* 2006;21:S43-S9.  
24  
25 10  
26  
27  
28  
29 11 4. Kilbourne AM, Neumann MS, Pincus HA, *et al.* Implementing evidence-based  
30 interventions in health care: application of the replicating effective programs framework.  
31  
32 12  
33  
34 13 *Implement Sci* 2007;2:42.  
35  
36 14  
37  
38  
39  
40 15 5. Medical Research Council. Developing and evaluating complex interventions: new  
41 guidance. UK: Medical Research Council, 2006.  
42  
43 16  
44  
45 17 <https://mrc.ukri.org/documents/pdf/developing-and-evaluating-complex-interventions/>.  
46  
47 18 (Accessed 10 Aug 2018)  
48  
49  
50 19  
51  
52  
53  
54 20 6. Oliver K, Kothari A, Mays N. The dark side of coproduction: do the costs outweigh the  
55 benefits for health research? *Health Research Policy and Systems* 2019;17:33.  
56  
57 21  
58  
59  
60

- 1  
2  
3 1  
4  
5  
6  
7  
8 2 7. Meisinger C, Döring A, Thorand B, *et al.* Body fat distribution and risk of type 2 diabetes  
9  
10 3 in the general population: are there differences between men and women? The  
11  
12 4 MONICA/KORA Augsburg Cohort Study. *Am J Clin Nutr* 2006;84:483-9.  
13  
14  
15  
16 5 8. Bhaskaran K, Douglas I, Forbes H, *et al.* Body-mass index and risk of 22 specific  
17  
18 6 cancers: a population-based cohort study of 5·24 million UK adults. *Lancet*  
19  
20 7 2014;384:755-65.  
21  
22  
23  
24  
25 8 9. Zhang C, Rexrode KM, Van Dam RM, *et al.* Abdominal obesity and the risk of all-cause,  
26  
27 9 cardiovascular, and cancer mortality: sixteen years of follow-up in US women. *Circ*  
28  
29 10 2008;117:1658-67.  
30  
31  
32  
33  
34 11 10. Kolotkin RL, Andersen JR. A systematic review of reviews: exploring the relationship  
35  
36 12 between obesity, weight loss and health-related quality of life. *Clin Obes* 2017;7:273-89.  
37  
38  
39  
40  
41 13 11. Simon GE, Von Korff M, Saunders K, *et al.* Association between obesity and psychiatric  
42  
43 14 disorders in the us adult population. *Arch Gen Psychiatry* 2006;63(7):824-30.  
44  
45  
46  
47 15 12. Public Health England. *Health matters: obesity and the food environment environment.*  
48  
49 16 UK: Public Health England, 2017. [https://www.gov.uk/government/publications/health-](https://www.gov.uk/government/publications/health-matters-obesity-and-the-food-environment/health-matters-obesity-and-the-food-environment--2)  
50  
51 17 [matters-obesity-and-the-food-environment/health-matters-obesity-and-the-food-](https://www.gov.uk/government/publications/health-matters-obesity-and-the-food-environment/health-matters-obesity-and-the-food-environment--2)  
52  
53 18 [environment--2.](https://www.gov.uk/government/publications/health-matters-obesity-and-the-food-environment/health-matters-obesity-and-the-food-environment--2) (Accessed 10 Aug 2018)  
54  
55  
56  
57  
58  
59  
60

- 1  
2  
3 1 13. World Health Organisation. *Global status report on noncommunicable diseases 2014*.  
4  
5 2 Geneva: World Health Organisation, 2014.  
6  
7  
8 3 [https://apps.who.int/iris/bitstream/handle/10665/148114/9789241564854\\_eng.pdf;jsessio](https://apps.who.int/iris/bitstream/handle/10665/148114/9789241564854_eng.pdf;jsessionid=A043D0E63AACA67752CC3294A1EBD7A3?sequence=1)  
9  
10 4 [nid=A043D0E63AACA67752CC3294A1EBD7A3?sequence=1](https://apps.who.int/iris/bitstream/handle/10665/148114/9789241564854_eng.pdf;jsessionid=A043D0E63AACA67752CC3294A1EBD7A3?sequence=1). (Accessed 04 Feb 2019)  
11  
12  
13  
14 5 14. Bambra C, Hillier F, Cairns J, *et al*. How effective are interventions at reducing  
15  
16 6 socioeconomic inequalities in obesity among children and adults? Two systematic  
17  
18 7 reviews. *Public Health Res* 2015;3.  
19  
20  
21  
22  
23 8 15. Bull ER, Dombrowski SU, McCleary N, *et al*. Are interventions for low-income groups  
24  
25 9 effective in changing healthy eating, physical activity and smoking behaviours? A  
26  
27 10 systematic review and meta-analysis. *BMJ Open*. 2014;4:e006046.  
28  
29  
30  
31  
32 11 16. Office for National Statistics. *Dataset: Regional gross value added (balanced) by*  
33  
34 12 *combined authority in the UK*. UK: Office for National Statistics, 2017.  
35  
36 13 [https://www.ons.gov.uk/economy/grossvalueaddedgva/datasets/regionalgrossvalueaddedb](https://www.ons.gov.uk/economy/grossvalueaddedgva/datasets/regionalgrossvalueaddedbalancedbycombinedauthorityintheuk)  
37  
38 14 [alancedbycombinedauthorityintheuk](https://www.ons.gov.uk/economy/grossvalueaddedgva/datasets/regionalgrossvalueaddedbalancedbycombinedauthorityintheuk). (Accessed 10 Aug 2018)  
39  
40  
41  
42  
43 15 17. Public Health England. *Work, worklessness and health: local infographic tool*. UK:  
44  
45 16 Public Health England, 2018. [https://www.gov.uk/government/publications/work-](https://www.gov.uk/government/publications/work-worklessness-and-health-local-infographic-tool)  
46  
47 17 [worklessness-and-health-local-infographic-tool](https://www.gov.uk/government/publications/work-worklessness-and-health-local-infographic-tool). (Accessed 10 Aug 2018)  
48  
49  
50  
51  
52 18 18. Northumberland County Council. *Public Health Service Statement 2017/18*.  
53  
54 19 Northumberland: Northumberland County Council, 2017.  
55  
56 20 <https://northumberland.gov.uk/NorthumberlandCountyCouncil/media/About-the->  
57  
58  
59  
60

- 1  
2  
3 1 Council/Performance/Service%20Statements%202016/2017-Public-Health-Service-  
4  
5 2 Statement-2017-18.pdf. (Accessed 10 Aug 2018)  
6  
7  
8  
9  
10 3 19. Public Health England. *Local Authority Health Profiles*. UK: Public Health England,  
11  
12 4 2019. [https://fingertips.phe.org.uk/profile/health-](https://fingertips.phe.org.uk/profile/health-profiles/data#page/0/gid/1938132701/pat/6/par/E12000001/ati/102/are/E06000057/iid/10101/age/169/sex/4)  
13  
14 5 [profiles/data#page/0/gid/1938132701/pat/6/par/E12000001/ati/102/are/E06000057/iid/10](https://fingertips.phe.org.uk/profile/health-profiles/data#page/0/gid/1938132701/pat/6/par/E12000001/ati/102/are/E06000057/iid/10101/age/169/sex/4)  
15  
16 6 [101/age/169/sex/4](https://fingertips.phe.org.uk/profile/health-profiles/data#page/0/gid/1938132701/pat/6/par/E12000001/ati/102/are/E06000057/iid/10101/age/169/sex/4). (Accessed 01 Feb 2019)  
17  
18  
19  
20  
21 7 20. Lister C, Payne H, Hanson CL, *et al*. The Public Health Innovation Model: Merging  
22  
23 8 Private Sector Processes with Public Health Strengths. *Front Public Health* 2017;5:192.  
24  
25  
26  
27 9 21. Parry GJ, Carson-Stevens A, Luff DF, *et al*. Recommendations for evaluation of health  
28  
29 10 care improvement initiatives. *Acad Pediatr* 2013 Nov-Dec;13(6 Suppl):S23-30.  
30  
31  
32  
33  
34 11 22. Hawkins J, Madden K, Fletcher A, *et al*. Development of a framework for the co-  
35  
36 12 production and prototyping of public health interventions. *BMC Public Health*  
37  
38 13 2017;17:689.  
39  
40  
41  
42  
43 14 23. Stevens VJ, Funk KL, Brantley PJ, *et al*. Design and implementation of an interactive  
44  
45 15 website to support long-term maintenance of weight loss. *J Med Internet Res*  
46  
47 16 2008;10(1):e1.  
48  
49  
50  
51  
52 17 24. Discover Momenta Ltd. *Momenta*. UK: Discover Momenta Ltd, 2013:  
53  
54 18 <http://discovermomenta.com/>. (Accessed 10 Aug 2018)  
55  
56  
57  
58  
59  
60

- 1  
2  
3 1 25. Hanson CL. *Advancing understanding of effective exercise on referral: a mixed methods*  
4  
5 2 *evaluation of the Northumberland scheme*. PhD Thesis, Durham University, 2017.  
6  
7 3 <http://etheses.dur.ac.uk/12162/>. (Accessed 10 Aug 2018)  
8  
9  
10  
11  
12 4 26. Hanson CL, Allin LJ, Ellis JG, *et al*. An evaluation of the efficacy of the exercise on  
13  
14 5 referral scheme in Northumberland, UK: association with physical activity and predictors  
15  
16 6 of engagement. A naturalistic observation study. *BMJ Open* 2013;3:e002849  
17  
18  
19  
20  
21 7 27. Sacher PM, Kolotourou M, Chadwick PM, *et al*. Randomized Controlled Trial of the  
22  
23 8 MEND Program: A Family-based Community Intervention for Childhood Obesity. *Obes*  
24  
25 9 2012;18:S62-S8.  
26  
27  
28  
29  
30 10 28. Leech N, Onwuegbuzie A. A typology of mixed methods research designs. *Qual Quant*  
31  
32 11 2009;43:265-75.  
33  
34  
35  
36 12 29. Marfell-Jones M, Olds T, Stewart A, *et al*. *International Standards for Anthropometric*  
37  
38 13 *Assessment (2007)*. Potchefstroom, South Africa: International Society for the  
39  
40 14 Advancement of Kinanthropometry, 2007.  
41  
42  
43  
44  
45 15 30. World Health Organisation. *BMI Classification 2006*. Geneva: World Health  
46  
47 16 Organisation, 2006. [http://apps.who.int/bmi/index.jsp?introPage=intro\\_3.html](http://apps.who.int/bmi/index.jsp?introPage=intro_3.html). (Accessed  
48  
49 17 10 Aug 2018)  
50  
51  
52  
53  
54 18 31. Clarke A, Friede T, Putz R, *et al*. Warwick-Edinburgh Mental Well-being Scale  
55  
56 19 (WEMWBS): Validated for teenage school students in England and Scotland. A mixed  
57  
58 20 methods assessment. *BMC Public Health* 2011;11:487.  
59  
60



- 1  
2  
3 1 32. Zigmond AS, Snaith RP. The Hospital Anxiety and Depression Scale. *Acta Psychiatr*  
4  
5 2 *Scand* 1983;67:361-70.  
6  
7  
8  
9  
10 3 33. Tong A, Sainsbury P, Craig J. Consolidated criteria for reporting qualitative research  
11  
12 4 (COREQ): a 32-item checklist for interviews and focus groups. *Int J Qual. Health Care*  
13  
14 5 2007;19:349–57  
15  
16  
17  
18  
19 6 34. Braun V, Clarke V. Using thematic analysis in psychology. *Qual Res Psychol* 2006;3:77-  
20  
21 7 101.  
22  
23  
24  
25 8 35. Mastellos N, Gunn LH, Felix LM, *et al.* Transtheoretical model stages of change for  
26  
27 9 dietary and physical exercise modification in weight loss management for overweight and  
28  
29 10 obese adults. *Cochrane Database Syst Rev* 2014;2:CD008066  
30  
31  
32  
33  
34 11 36. Garrow JS, Summerbell CD. Meta-analysis: effect of exercise, with or without dieting, on  
35  
36 12 the body composition of overweight subjects. *Eur J Clin Nutr* 1995;49:1-10.  
37  
38  
39  
40  
41 13 37. Wright F, Boyle S, Baxter K, *et al.* Understanding the relationship between weight loss,  
42  
43 14 emotional well-being and health-related quality of life in patients attending a specialist  
44  
45 15 obesity weight management service. *J Health Psychol* 2013;18:574-86.  
46  
47  
48  
49  
50 16 38. Somerville R, McKenzie K, Eslami S, *et al.* Poor mental health in severely obese patients  
51  
52 17 is not explained by the presence of comorbidities. *Clin Obes* 2014;5:12-21.  
53  
54  
55  
56 18 39. Flodgren G, Goncalves BDC, Summerbell CD. Interventions to change the behaviour of  
57  
58 19 health professionals and the organisation of care to promote weight reduction in children  
59  
60

- 1  
2  
3 1 and adults with overweight or obesity. *Cochrane Database of Syst Rev*  
4  
5 2 2017;11:CD000984.  
6  
7  
8  
9  
10 3 40. Phelan SM, Burgess DJ, Yeazel MW, *et al.* Impact of weight bias and stigma on quality  
11  
12 4 of care and outcomes for patients with obesity. *Obes Rev* 2015;16:319-26.  
13  
14  
15  
16 5 41. Logue J, Allardice G, Gillies M, *et al.* Outcomes of a specialist weight management  
17  
18 6 programme in the UK National Health Service: prospective study of 1838 patients. *BMJ*  
19  
20 7 *Open* 2014;4:e003747.  
21  
22  
23  
24  
25 8 42. Lebrun LA, Chowdhury J, Sripipatana A, *et al.* Overweight/obesity and weight-related  
26  
27 9 treatment among patients in U.S. federally supported health centers. *Obes Res Clin Pract*  
28  
29 10 2013;7:e377-e90.  
30  
31  
32  
33  
34 11 43. Ahern AL, Aveyard P, Boyland EJ, *et al.* Inequalities in the uptake of weight  
35  
36 12 management interventions in a pragmatic trial: an observational study in primary care. *Br*  
37  
38 13 *J Gen Pract* 2016;66(645):e258-63.  
39  
40  
41  
42  
43 14 44. Adams J, Mytton O, White M, *et al.* Why Are Some Population Interventions for Diet  
44  
45 15 and Obesity More Equitable and Effective Than Others? The Role of Individual Agency.  
46  
47 16 *PLoS Med* 2016;13(4).  
48  
49  
50  
51  
52 17 45. Madigan CD, Daley AJ, Lewis AL, *et al.* Which weight-loss programmes are as effective  
53  
54 18 as Weight Watchers®? *Brit J Gen Pract* 2014;64(620):e128-e136.  
55  
56  
57 19  
58  
59  
60

- 1  
2  
3 1 46. Curtis S, Oven K, Wistow J, *et al.* Adaptation to extreme weather events in complex  
4  
5 2 health and social care systems: The example of older people's services in England.  
6  
7 3 *Environ Plann C: Politics and Space* 2018;36:67-91.  
8  
9  
10  
11  
12 4 47. Milat AJ, King L, Newson R, *et al.* Increasing the scale and adoption of population health  
13  
14 5 interventions: experiences and perspectives of policy makers, practitioners, and  
15  
16 6 researchers. *Health Res Policy and Systems* 2014;12:18.  
17  
18  
19  
20  
21 7 48. Jebb S. *Dusting off Foresight's obesity report*. Foresight Blog UK: Government Office  
22  
23 8 for Science, 2017. [https://foresightprojects.blog.gov.uk/2017/10/04/dusting-off-](https://foresightprojects.blog.gov.uk/2017/10/04/dusting-off-foresights-obesity-report/)  
24  
25 9 [foresights-obesity-report/](https://foresightprojects.blog.gov.uk/2017/10/04/dusting-off-foresights-obesity-report/). (Accessed 01 Feb 2019)  
26  
27  
28  
29  
30 10 49. Wolfenden L, Goldman S, Stacey FG *et al.* Strategies to improve the implementation of  
31  
32 11 workplace-based policies or practices targeting tobacco, alcohol, diet, physical activity  
33  
34 12 and obesity. *Cochrane Database of Syst Rev* 2018;11:CD012439.  
35  
36  
37  
38  
39 13  
40  
41  
42  
43 14  
44  
45  
46  
47 15  
48  
49 16  
50  
51 17  
52  
53 18  
54  
55 19  
56  
57 20  
58  
59  
60

**SUPPLEMENTARY FILE 1.****Healthcare professionals' semi-structured interview guide**

*Semi Structured Interview Set the interviewee at ease; explain purpose of the interview; offer a better understanding of what the referral process requires to aid tier 2 weight management to be delivered in Northumberland; explanation about how the interview will be recorded; reaffirmation of consent; and how the information will be analysed and stored; rules of confidentiality / anonymity etc.*

**Questions:**

1. Thinking about raising the weight issue, tell me about your experience of discussing weight with patients.

*Prompts*

- *How does it feel to raise weight as an issue?*
- *Are patients open to discussing weight problems?*
- *Do you find a difference between genders when discussing weight?*
- *What helps you, such as the NHS Health Check Programme, to raise the issue of weight?*
- *What else would help to raise the issue or weight in appointments?*

2. Greater retention is often achieved when patients are ready to change, tell me how you work with / assess patient's readiness to change.

*Prompts*

- *Have you had training around the cycle of change?*
- *Do you use any specific tools or resources to assess the patient?*
- *What would help you to assess the patient's readiness to change?*

- 1  
2  
3  
4  
5  
6  
7  
8  
9  
10  
11  
12  
13  
14  
15  
16  
17  
18  
19  
20  
21  
22  
23  
24
3. Thinking the information and resources available to you during the referral, do you feel you had enough information and resources to encourage patient take up of the programme?

25  
26  
27  
28  
29  
30  
31  
32  
33  
34  
35  
36  
37  
38  
39  
40  
41  
42  
43  
44  
45  
46  
47

*Prompts*

- *Did you have enough background information?*
- *Were the referral forms suitable / capture all the information required?*
- *Were the patient leaflets / resources suitable?*
- *Were there questions or issues raised that couldn't be answered?*
- *Was the process easy to use?*
- *What else could help you to make referrals to weight management programmes?*

4. Thinking about after you referred the patient, what happened next? (excluded after pilot)

48  
49  
50  
51  
52  
53  
54  
55  
56  
57  
58  
59  
60

*Prompts*

- *Did you get feedback from the weight management programme on the progress of your patient?*
- *Did your patients achieve weight loss?*
- *Did your patient come back and talk about their experience?*

5. What things are most likely to prevent you from making the referral a weight management programme, either commercial or Public Health funded?

*Prompts*

- *Are there barriers that you perceive, such as cost to the patient?*
- *Are you concerned with raising the weight issue?*
- *Is it a time factor if the patient has an appointment for anything other than a weight issue?*
- *What would help you to overcome the barriers that prevent you from making the referral?*

- 1  
2  
3  
4  
5  
6  
7
6. Is there anything else that you would like to tell me about your expectations and experiences of the weight management programme?

8 **Focus Group Topic Guide**

9  
10  
11  
12  
13  
14 *Set group at ease; explain purpose of the focus group; offer a better understanding of what works for*  
15 *people in terms of tier 2 weight management and what doesn't, aiding development of an effective*  
16 *programme for Northumberland residents; explanation about how the focus group will be recorded;*  
17 *reaffirmation of consent; and how the information will be analysed and stored; rules of confidentiality /*  
18 *anonymity etc.*  
19  
20  
21  
22  
23  
24  
25  
26  
27  
28

- 29 1. Tell me a bit about what sort of weight management activity you have taken part in, in the past.

30  
31  
32 *Prompts*

- 33  
34  
35  
36  
37  
38  
39  
40  
41  
42  
43
- *What influence have others had on your weight management?*
  - *Do you have any particular likes/dislikes of physical activity/managing weight/nutrition*
  - *Has there been anything else that has influenced your management of weight?*

- 44 2. So thinking about the weight management programme you have undertaken, how did you find out  
45 about it?  
46  
47  
48

49 *Prompts*

- 50  
51  
52  
53  
54  
55  
56  
57  
58  
59  
60
- *Who / what motivated you to attend?*
  - *What made you decide that this is the right time to look at managing your weight?*
  - *Did the time of year make a difference?*

1  
2  
3 3. Thinking about your experience of when you were referred to the weight management programme,  
4  
5 how did you find the process?  
6

7  
8  
9  
10  
11  
12  
13  
14  
15  
16  
17  
18  
19  
20  
21  
22  
23  
24  
25  
26  
27  
28  
29  
30  
31  
32  
33  
34  
35  
36  
37  
38  
39  
40  
41  
42  
43  
44  
45  
46  
47  
48  
49  
50  
51  
52  
53  
54  
55  
56  
57  
58  
59  
60

*Prompts*

- *What type of health professional referred you? (GP / Practice Nurse)*
- *Did you specifically attend Primary Care to discuss your weight?*
- *How was weight raised?*
- *What did the referrer explain to you about the programme? Did you get enough information?*
- *How long was it from your referral from Primary Care to the first assessment in the weight management programme; was this what you expected? Were you still motivated?*

4. How did you feel about being referred?

- *Prompts*
- *How confident did you feel about taking part in the programme?*
- *Was there anything that you were particularly looking forward to?*
- *Was there anything that you were worried about?*

5. What did you hope to achieve by taking part in the weight management programme?

*Prompts*

- *What were your expectations when you start attending the scheme?*
- *Have there been changes to your health that you expected happen as a result of participation?*
- *How quickly did you expect to see these changes? And did this happen?*

6. Thinking about after you were referred, what happened next?

*Prompts*

- *How long after referral did it take to be contacted by the Active Northumberland?*
- *What information did you receive prior to the initial consultation?*
- *How comfortable did you feel coming to the initial consultation?*

7. What influenced you most to attend the weight management programme?

*Prompts*

- *What did you expect from the staff?*
- *How important to you were changes in health or weight?*
- *Why were the influences raised important?*

8. What things were most likely to prevent you from attending the programme?

*Prompts*

- *Tell me about any worries you might have had about health issues.*
- *Tell me about any other things, such as other commitments, that might have stopped you from attending*
- *Did any of these issues arise? How did you overcome these issues?*

9. Now that you have completed the programme, tell me how did you felt about undertaking the weight management programme?

*Prompts*

- *Did you achieve the health / weight outcomes you expected?*
- *Why do you think it worked or not for you?*
- *Do you feel you now have the tools to continue to make positive lifestyle choices?*
- *Is there something that will prevent you to continue to make positive lifestyle choices?*



10. Is there anything else that you would like to tell me about your expectations and experiences  
of the weight management programme?

For peer review only

1  
2  
3  
4  
5  
6  
7  
8  
9  
10  
11  
12  
13  
14  
15  
16  
17  
18  
19  
20  
21  
22  
23  
24  
25  
26  
27  
28  
29  
30  
31  
32  
33  
34  
35  
36  
37  
38  
39  
40  
41  
42  
43  
44  
45  
46  
47  
48  
49  
50  
51  
52  
53  
54  
55  
56  
57  
58  
59  
60

# BMJ Open

## Prototyping for public health in a local context: a streamlined evaluation of a community-based weight management programme (Momenta), Northumberland, UK

|                                 |                                                                                                                                                                                                                                                                                                                                                                                                                                                                                                                                                                                                                                                                                                                                                                                                                                                                                      |
|---------------------------------|--------------------------------------------------------------------------------------------------------------------------------------------------------------------------------------------------------------------------------------------------------------------------------------------------------------------------------------------------------------------------------------------------------------------------------------------------------------------------------------------------------------------------------------------------------------------------------------------------------------------------------------------------------------------------------------------------------------------------------------------------------------------------------------------------------------------------------------------------------------------------------------|
| Journal:                        | <i>BMJ Open</i>                                                                                                                                                                                                                                                                                                                                                                                                                                                                                                                                                                                                                                                                                                                                                                                                                                                                      |
| Manuscript ID                   | bmjopen-2019-029718.R2                                                                                                                                                                                                                                                                                                                                                                                                                                                                                                                                                                                                                                                                                                                                                                                                                                                               |
| Article Type:                   | Original research                                                                                                                                                                                                                                                                                                                                                                                                                                                                                                                                                                                                                                                                                                                                                                                                                                                                    |
| Date Submitted by the Author:   | 12-Aug-2019                                                                                                                                                                                                                                                                                                                                                                                                                                                                                                                                                                                                                                                                                                                                                                                                                                                                          |
| Complete List of Authors:       | Dodd-Reynolds, Caroline; Durham University, Department of Sport and Exercise Sciences; Durham University, Wolfson Research Institute for Health and Wellbeing Physical Activity Special Interest Group<br>Nevens, Lisa; Northumbria Healthcare NHS Foundation Trust Community Services Business Unit<br>Oliver, Emily; Durham University, Wolfson Research Institute for Health and Wellbeing Physical Activity Special Interest Group; Durham University, Department of Sport and Exercise Sciences,<br>Finch, Tracy; Northumbria University, Nursing, Midwifery and Health<br>Lake, Amelia; Department of Science, School of Science, Engineering and Design, Teesside University<br>Hanson, Coral; Edinburgh Napier University, School of Health and Social Care; Durham University, Wolfson Research Institute for Health and Wellbeing Physical Activity Special Interest Group |
| <b>Primary Subject Heading</b>: | Public health                                                                                                                                                                                                                                                                                                                                                                                                                                                                                                                                                                                                                                                                                                                                                                                                                                                                        |
| Secondary Subject Heading:      | Nutrition and metabolism                                                                                                                                                                                                                                                                                                                                                                                                                                                                                                                                                                                                                                                                                                                                                                                                                                                             |
| Keywords:                       | public health evaluation, prototyping, implementation, community weight management, NUTRITION & DIETETICS, exercise referral                                                                                                                                                                                                                                                                                                                                                                                                                                                                                                                                                                                                                                                                                                                                                         |
|                                 |                                                                                                                                                                                                                                                                                                                                                                                                                                                                                                                                                                                                                                                                                                                                                                                                                                                                                      |

SCHOLARONE™  
Manuscripts

1  
2  
3 1 Prototyping for public health in a local context: a streamlined evaluation of a community-  
4 based weight management programme (Momenta), Northumberland, UK  
5  
6 2  
7  
8 3  
9  
10 4 Caroline J Dodd-Reynolds<sup>1,2</sup> (corresponding author\*), Lisa Nevens<sup>3</sup>, Emily J Oliver<sup>1,2</sup>, Tracy  
11 Finch<sup>4</sup>, Amelia A Lake<sup>5,6</sup> Coral L Hanson<sup>7</sup>  
12  
13 5  
14  
15 6  
16  
17  
18 7  
19  
20 8  
21  
22 9  
23  
24 10  
25  
26  
27 11  
28  
29 12  
30  
31 13  
32  
33  
34 14  
35  
36 15  
37  
38 16  
39  
40 17  
41  
42  
43 18  
44  
45  
46 19  
47  
48  
49 20  
50 21  
51  
52 22  
53  
54 23  
55  
56 24  
57  
58  
59  
60 25

<sup>1</sup>Department of Sport and Exercise Sciences, Durham University, Durham, DH1 3HN, UK\*.

Email: caroline.dodd-reynolds@durham.ac.uk Tel: +44(0)191 3342000

<sup>2</sup>Wolfson Research Institute for Health and Wellbeing Physical Activity Special Interest Group, Durham University, Durham, UK.

<sup>3</sup>Northumbria Healthcare NHS Foundation Trust, Northumberland, UK.

<sup>4</sup>Department of Nursing, Midwifery and Health, Northumbria University, Newcastle upon Tyne, UK

<sup>5</sup>Department of Science, School of Science, Engineering and Design, Teesside University, Teesside, UK

<sup>6</sup>Fuse – UKCRC Centre for Translational Research in Public Health, UK

<sup>7</sup>School of Health and Social Care, Edinburgh Napier University, Edinburgh, UK

**Word count:** 4214

**Keywords:** Public health evaluation, prototyping, implementation, community weight management, diet, exercise referral

## 1 **ABSTRACT**

2 **Objectives** Stakeholder co-production in design of public health programmes may reduce the  
3 ‘implementation gap’ but can be time-consuming and costly. Prototyping, iterative refining  
4 relevant to delivery context, offers a potential solution. This evaluation explored  
5 implementation and lessons learned for a 12-week referral-based weight-management  
6 programme, ‘Momenta’, along with feasibility of an iterative prototyping evaluation  
7 framework.

8 **Design** Mixed methods evaluation: qualitative exploration of implementation with referrers  
9 and service users; preliminary analysis of anonymised quantitative service data (12 and 52  
10 weeks).

11 **Setting** Two leisure centres in Northumberland, northeast England.

12 **Participants** Individual interviews with referring professionals (n=5) and focus groups with  
13 service users (n=13). Individuals (n=182) referred by healthcare professionals (quantitative  
14 data).

15 **Interventions** Three 12-week programme iterations: Momenta (n=59), Momenta-Fitness  
16 membership (Momenta-Fitness (n=58), and Fitness membership only (n=65).

17 **Primary and secondary outcome measures** Primary outcome: Qualitative themes  
18 developed through stakeholder-engagement. Secondary outcomes included preliminary  
19 exploration of recruitment, uptake, retention, and changes in weight, BMI waist  
20 circumference and psychological wellbeing.

21 **Results** Service users reported positive experiences of Momenta. Implementation gaps were  
22 revealed around the referral process and practitioner knowledge. Prototyping enabled

1  
2  
3 1 iterative refinements such as broadening inclusion criteria. Uptake and 12-week retention  
4  
5 2 were higher for Momenta (84.7%, 45.8%) and Momenta-Fitness (93.1%, 60.3%) versus  
6  
7 3 Fitness-only (75.4%, 24.6%). Exploration of other preliminary outcomes suggested potential  
8  
9 4 for within-group weight loss and increased psychological wellbeing for Momenta and  
10  
11 5 Momenta-Fitness at programme end. 52-week follow-up data were limited (32%, 33%, and  
12  
13 6 6% of those who started Momenta, Momenta-Fitness and Fitness respectively) but suggested  
14  
15 7 potential for weight loss maintenance in Momenta-Fitness.  
16  
17  
18  
19  
20  
21  
22

23  
24 9 **Conclusions** Identification of issues within the referral process enabled real-time iterative  
25  
26 10 refinement, whilst lessons learned may be of value for local implementation of ‘off-the-shelf’  
27  
28 11 weight management packages more generally. Our preliminary data suggest that Momenta  
29  
30 12 has potential for weight loss, particularly when offered with a fitness membership.  
31  
32  
33  
34  
35  
36  
37  
38  
39  
40  
41  
42  
43  
44  
45  
46  
47  
48  
49  
50  
51  
52  
53  
54  
55  
56  
57  
58  
59  
60

1  
2  
3 1  
4  
56 2 **ARTICLE SUMMARY**  
7  
89 3  
10  
1112 4 **Strengths and limitations of this study**  
13  
1415 5  
16  
1718  
19 6 • This study advances understanding about whether prototyping is a time-efficient and  
20  
21 7 cost-effective approach to design and implementation of public health programmes.  
22  
23 824  
25  
26 9 • This mixed methods evaluation provides insight into the implementation of an ‘off-  
27  
28 10 the-shelf’ weight management programme, in a local context.  
29  
30 1131  
32  
33 12 • Embedding stakeholders’ views throughout the entire evaluation process allowed for  
34  
35 13 ongoing, iterative refinement.  
36  
37 1438  
39  
40 15 • A limitation to the quantitative component is the small sample size and rate of missing  
41  
42 16 data at 1 year; findings should thus be interpreted with caution.  
43  
44 1745  
46  
47 18 • Qualitative interviews and focus groups can only provide information about what  
48  
49 19 participants recall about their experiences, meaning that there is a potential for recall  
50  
51 20 bias.  
52  
5354 21  
55  
5657 22  
58  
59

60 23

## 1 INTRODUCTION

2  
3  
4  
5  
6  
7  
8 Failure to implement effective public health interventions when programmes are scaled up or  
9  
10 transferred across contexts is widely reported.<sup>1</sup> Proposed approaches attempting to address  
11  
12 this implementation gap include; effectiveness-implementation hybrid designs,<sup>2</sup> linking  
13  
14 action to theory and models based on theory,<sup>3</sup> and application of the replicating effective  
15  
16 programmes framework.<sup>4</sup> Common to all is advocacy of a developmental process reflecting  
17  
18 on existing knowledge about the target population and planned programme prior to service  
19  
20 delivery. Furthermore, engagement of service users is encouraged at all stages of intervention  
21  
22 and evaluation design in MRC guidance.<sup>5</sup> Although this increases the likelihood of services  
23  
24 meeting all stakeholder needs, concerns about the practical, personal, and professional costs  
25  
26 of co-production have been raised.<sup>6</sup> Resulting well-designed services will be tailored to a  
27  
28 problem that may have changed during the time spent developing the intervention.  
29  
30  
31 Additionally, public access may be delayed. Resource-pressured public health services must  
32  
33 therefore consider pragmatic alternatives to service design and implementation. In this paper,  
34  
35 we explore a novel evaluation approach to these implementation challenges, focusing on a  
36  
37 problem high on the public health agenda: obesity and overweight.  
38  
39  
40  
41  
42  
43  
44

45 Targeting elevated weight status is a public health priority, obesity being a recognised risk  
46  
47 factor for many negative physical and psychological health outcomes.<sup>7-11</sup> In England for  
48  
49 example, obesity and overweight are associated with 30,000 deaths and an estimated National  
50  
51 Health Service cost of £6.1 billion per annum.<sup>12</sup> Globally, countries with higher income  
52  
53 inequalities tend to have higher rates of obesity.<sup>13</sup> Excess weight is also associated with  
54  
55 widening social and economic deprivation,<sup>14</sup> with calls to improve the effectiveness of  
56  
57 behaviour change interventions for low-income groups.<sup>15</sup> There is a clear need for effective  
58  
59  
60

1 public health programmes that can be refined according to local need, especially in areas with  
2 substantial deprivation. This evaluation focuses on Northumberland, in northeast England.  
3 Northumberland is one of the lowest ranked counties in England by Gross Value Added per  
4 capita (£16,140).<sup>16</sup> Unemployment is higher (5.5% versus 4.8%) than the England average<sup>17</sup>  
5 and Northumberland public health spend per person is £53, compared to a £59 national  
6 average.<sup>18</sup> 63.8% of adults are classified as having excess weight, higher than the national  
7 average of 61.3%.<sup>19</sup>

8  
9 The need for innovation within public health has been postulated, shifting away from the  
10 traditional linear pre-conceived and evidence-based model.<sup>20</sup> For example, Parry and  
11 colleagues<sup>21</sup> call for research to explore not only how a programme works, but also the  
12 context and requirements for any adaptations. One such approach is prototyping<sup>22</sup> where  
13 projects test innovations iteratively, with ongoing refinement considering the interplay  
14 between a programme and its delivery context. Evaluation and public health teams are able to  
15 communicate at all stages of the programme, with evaluation recommendations incorporated  
16 via a rapid-cycle basis.<sup>21</sup> A small number of studies to date, for example in drug prevention<sup>22</sup>  
17 and web-based support of long-term weight loss<sup>23</sup> have demonstrated efficiencies when  
18 including elements of prototyping within programme development (including time,  
19 adaptation to context and cost). Such an approach seems particularly well-suited to weight  
20 management, where there are many examples of ‘good’ practice, or effectiveness, but no  
21 clear consensus on ‘best’ practice at service-delivery level. There is also limited  
22 understanding of how ‘scaling up’ and adapting of programmes or interventions to local  
23 contexts may impact on effectiveness. This evaluation has particular value therefore in testing  
24 a prototyping approach for a weight management programme, delivered and adapted ‘in real-  
25 time’, at local authority level.



1  
2  
3 1 The aim was to explore implementation of an ‘off-the-shelf’ weight management programme,  
4  
5 2 Momenta<sup>24</sup>, in a challenging context. Specific objectives were to explore local  
6  
7 3 implementation, consider feasibility of the iterative prototyping evaluation framework and  
8  
9 4 explore preliminary outcome domains including recruitment, retention, weight change and  
10  
11 5 wellbeing.  
12  
13  
14  
15  
16

## 17 7 **METHODS**

### 19 8 20 21 9 **The prototyping process: local context and evaluation design**

22  
23  
24 10  
25  
26 11 A local authority health needs assessment identified a gap in provision for a lifestyle-based  
27  
28 12 weight management referral programme within Northumberland. Adults with overweight or  
29  
30 13 obesity were at the time eligible for referral to the Northumberland exercise referral scheme  
31  
32 14 (ERS), however previous evaluation demonstrated modest weight loss<sup>25</sup> and body mass index  
33  
34 15 (BMI) >30 kg/m<sup>2</sup> was negatively associated with adherence.<sup>26</sup> Thus ‘Momenta’ was  
35  
36 16 commissioned for local adaptation and delivery. The Momenta programme incorporates  
37  
38 17 evidence-based behaviour change techniques and is designed to be delivered by fitness  
39  
40 18 professionals in a leisure environment.<sup>24</sup> Developed by the MEND childhood weight  
41  
42 19 management programme<sup>27</sup> designers, this 12-week programme aims to facilitate weight loss  
43  
44 20 by engaging participants in 12 key behaviours broadly encompassing psychology, diet and  
45  
46 21 physical activity (supplementary file 1). Briefly, Momenta sessions explored topics using  
47  
48 22 interactive and experiential learning techniques including brainstorming, group activities and  
49  
50 23 discussion, quizzes and games. At the end of each session, participants set goals focusing on  
51  
52 24 one of the 12 key behaviours. At the beginning of each session, the group discussed the  
53  
54  
55  
56  
57  
58  
59  
60

1 previous weeks' goals by exchanging stories and brainstorming challenges. All interventions  
2 were free to service users.

3  
4  
5  
6  
7  
8  
9  
10 The local Leisure Trust was commissioned to deliver a pilot Momenta programme.  
11  
12 Commissioners and providers had ideas about alternative delivery options and due to an  
13 established academic relationship, asked the study team for advice about robust evaluation  
14 that would allow for feedback in real time and at the end of the pilot. Stakeholder meetings  
15 were held with Public Health staff (n=2), Leisure Trust managers (n=3), delivery staff (n=2)  
16 and Momenta programme developers (n=2). As part of the prototyping process, members of  
17 the evaluation team (CDR, EO) provided guidance on evaluation design and light touch  
18 advice about tools to explore preliminary effectiveness. The evaluation was thus co-  
19 produced to ensure a robust framework, whilst meeting strategic local needs. For example,  
20 commissioners were concerned about meeting recruitment targets for an existing specialist  
21 weight management service used mainly for pre-bariatric patients and Momenta was initially  
22 commissioned for patients with BMI 25.0-29.9 kg/m<sup>2</sup>, although this was later amended.  
23 Furthermore, commissioners were keen to consider accessibility of provision and wished to  
24 explore offering free gym, swimming and fitness class membership. The evaluation was  
25 designed to accommodate this.

26  
27  
28  
29  
30  
31  
32  
33  
34  
35  
36  
37  
38  
39  
40  
41  
42  
43  
44  
45  
46  
47 The programme was ultimately delivered at two leisure sites situated within the 20% and  
48 50% most deprived neighbourhoods in the country. Six General Practice (GP) surgeries,  
49 identified as the best referrers to the existing ERS, were asked to refer suitable patients to  
50 Momenta. The programme manager and the public health improvement manager (LN)  
51 attended practice meetings to articulate referral criteria and disseminate advertising materials.  
52  
53  
54  
55  
56  
57  
58  
59  
60

1  
2  
3 1 Attendance varied from two to all practice staff, meaning that in some surgeries knowledge  
4  
5 2 of the programme was reliant on dissemination by those who attended.  
6  
7  
8 3

9  
10 4 A mixed methods evaluation was agreed between the evaluation team and commissioners.  
11  
12 5 Qualitative and quantitative components were conducted concurrently and had equal status.<sup>28</sup>  
13  
14 6 Prototyping allowed for iterative changes to be made to the implementation and delivery of the  
15  
16  
17 7 programme in real time and we reflect upon these in the results and discussion.  
18  
19 8

20  
21 9 Referrals by healthcare professionals (HCPs) were via a standardised form to the appropriate  
22  
23  
24 10 leisure site. Prior to programme commencement the Leisure Trust, in conjunction with the  
25  
26 11 Momenta programme designer and members of the evaluation team, held a training day for  
27  
28 12 delivery staff. Although staff were qualified to deliver Momenta, extra bespoke training  
29  
30  
31 13 (including role-play scenarios and problem-solving discussions) was delivered by the clinical  
32  
33 14 psychologist who designed Momenta. The evaluation team (CDR, CH) trained delivery staff  
34  
35 15 in international standard anthropometric techniques<sup>29</sup> and familiarised them with other  
36  
37  
38 16 evaluation measures.  
39  
40 17

41  
42 18 Programme providers allocated service users into one of three comparison groups:

- 43  
44 19 a) Combined Momenta plus fitness membership (Momenta-Fitness);  
45  
46  
47 20 b) Momenta;  
48  
49 21 c) Fitness membership (Fitness only).

50  
51 22 Participants were allocated into groups in order of receipt (the first referral form received was  
52  
53  
54 23 allocated to Momenta-Fitness, the second form to Momenta, the third form to fitness only  
55  
56 24 etc.). The provider then contacted participants by telephone to arrange attendance. If a  
57  
58 25 participant was unable to attend the allocated group, (e.g. due to inconvenient session times)  
59  
60

1 provider allocated them to a different group after discussion. Due to maximum recommended  
2 Momenta group size, referrals were split into delivery cohorts of 15, with groups rolling  
3 through March 2015 to April 2016.

4  
5 Implementation effectiveness for the referral process was explored through semi-structured  
6 interviews with referring HCPs (undertaken at referring surgeries) and focus groups with  
7 service users (in leisure centres). All were conducted by LN during March-July 2015, as part  
8 of her Public Health Master's degree (which contained qualitative methods training), mentored  
9 by TF, an experienced qualitative researcher. LN was employed as a member of the  
10 Northumberland public health team at the time of the evaluation. Questions are included in  
11 supplementary file 2. Data were audio-recorded. Results are reported using the Consolidated  
12 criteria for Reporting Qualitative research guidelines.<sup>30</sup>

13  
14 Practice managers from all six referring surgeries were sent an email invitation for staff to  
15 take part (n = 84), (General Practitioner = 53, Practice Nurse = 18, Health Care Assistant =  
16 13). Individual correspondence was sent to those agreeing. LN informed participants about  
17 her employment status and that the study aimed to understand implementation issues.  
18 Interviews aimed to explore HCPs' referral experiences; raising weight issues; assessing  
19 readiness to change; marketing and referral materials; and the referral process. Interview  
20 questions were pilot tested with public health colleagues to assess timing and ensure validity.  
21 One question (*Thinking about after you referred the patient, what happened next?*) was  
22 omitted after piloting as it was realised HCPs would not have had patient feedback at that  
23 point. Interviews lasted on average 26 minutes and were transcribed verbatim. Data were  
24 analysed following each interview, with developing themes considered to determine whether

1 questions required refinement. Initial themes generated from the first two interviews did not  
2  
3  
4  
5  
6  
7  
8  
9  
10  
11  
12  
13  
14  
15  
16  
17  
18  
19  
20  
21  
22  
23  
24  
25  
26  
27  
28  
29  
30  
31  
32  
33  
34  
35  
36  
37  
38  
39  
40  
41  
42  
43  
44  
45  
46  
47  
48  
49  
50  
51  
52  
53  
54  
55  
56  
57  
58  
59  
60

1 questions required refinement. Initial themes generated from the first two interviews did not  
2 change and thus questions remained constant, although prompts were added.

3  
4  
5  
6  
7  
8  
9  
10  
11  
12  
13  
14  
15  
16  
17  
18  
19  
20  
21  
22  
23  
24  
25  
26  
27  
28  
29  
30  
31  
32  
33  
34  
35  
36  
37  
38  
39  
40  
41  
42  
43  
44  
45  
46  
47  
48  
49  
50  
51  
52  
53  
54  
55  
56  
57  
58  
59  
60

4 During the initial assessment session for the first wave of referrals, all ( $n = 39$ ) were given a  
5 written invitation to participate in a series of focus groups at programme-end to explore  
6 experiences. Emphasis was placed on the referral process, initial expectations and  
7 experiences of participation; how weight issues were raised by HCPs; time from referral to  
8 initial assessment; and facilitators and barriers to taking part. Focus groups lasted between 26  
9 and 44 minutes.

10  
11 Preliminary outcome data were collected to provide an initial indication of programme  
12 success. These included anthropometric measurements to determine weight change. Well-  
13 being measures were of specific interest to commissioners. Sociodemographic information  
14 was also available as indicated.

15  
16 Age, gender and postcode (for index of multiple deprivation, IMD) were recorded by  
17 referring HCPs on the referral form. Employment status, level of education, cohort wave and  
18 programme group were recorded by leisure staff, who also measured weight and stature  
19 (without shoes or bulky clothing) and waist circumference at baseline and programme end.

20 Measures were taken in at least duplicate, using standardised tools in accordance with  
21 international standards<sup>29</sup> using SECA 761 scales, a Leicester portable stadiometer and  
22 anthropometry tape. Body mass index was calculated and classified according to WHO  
23 guidelines.<sup>31</sup> The Warwick-Edinburgh Mental Well-being Scale,<sup>32</sup> and the Hospital Anxiety  
24 and Depression Scale (HADS)<sup>33</sup> were administered at each time-point. Attendance at  
25 Momenta and leisure centre usage was monitored via swipe-card tracking. 52 weeks after

1 commencing the programme, service users were invited to attend a follow-up session, where  
2 leisure staff repeated physiological and psychological measures. Programme providers  
3 collected and collated quantitative data and provided an anonymised dataset to the evaluation  
4 team for analysis.

## 6 **Patient and public involvement**

7 Patients and the public were not involved in the choice of evaluation topic, assisting in the  
8 study design, advising on the project or in carrying out the evaluation.

## 10 **Data analyses**

12 Qualitative data were audio-recorded and transcribed by LN using a thematic process.<sup>34</sup> Data  
13 were organised according to concepts, key themes and developing categories. Data coding  
14 was discussed with TF, allowing comparison of data interpretation and subsequent coding  
15 refinement. Evolving key themes were refined through the analysis process and subsequent  
16 cross-sectional thematic labelling of data, thus generating deeper understanding. Where  
17 possible, key phrases or expressions identified from interviews and focus groups were  
18 retained within coding and thematic labelling. A public health colleague helped to verify  
19 interpretations of the data and appropriateness of codes applied. Once initial interviews were  
20 coded this framework was applied to remaining data. Notes taken during focus groups helped  
21 to contextualise when developing themes and included information about dynamics within  
22 groups, such as influence, disagreement, humour and peer exposure.

24 The anonymised quantitative dataset was analysed using PSAW Statistics V.22. Descriptive  
25 statistics were calculated for age, gender, IMD, employment status, initial BMI, leisure site,

1  
2  
3 1 level of education, and uptake and adherence. Distribution and normality of measures  
4  
5 2 (weight, BMI, waist circumference, psychological wellbeing and attendance) were assessed  
6  
7 3 using Shapiro Wilk tests and median and interquartile range (IQR) scores calculated for each  
8  
9 4 group at baseline and 12 weeks (attendance, 12 weeks only). For information and general  
10  
11 5 descriptive purposes, preliminary inferential analyses were undertaken. Using complete  
12  
13 6 cases, Kruskal-Wallis H tests were used to explore between-group differences at baseline and  
14  
15 7 at 12 weeks and Wilcoxon-signed rank tests explored repeated measures differences between  
16  
17 8 baseline and 12-week scores. Complete cases available at 52 weeks ( $n = 37$ ) were considered  
18  
19 9 similarly, but via separate analyses due to limited available data across comparison groups.  
20  
21  
22  
23  
24  
25  
26  
27  
28  
29  
30  
31  
32  
33  
34  
35  
36  
37  
38  
39  
40  
41  
42  
43  
44  
45  
46  
47  
48  
49  
50  
51  
52  
53  
54  
55  
56  
57  
58  
59  
60

## 11 **RESULTS**

12  
13 Between December 2014 and March 2016, the programme received 182 referrals and was  
14 delivered in four cohorts across leisure sites. Due to initial low levels of recruitment, the first  
15 cohort did not start until March 2015. Referrals were mainly female (83%) and 30.6% lived  
16 in the 20% most deprived areas (table 1).  
17  
18  
19  
20  
21  
22  
23  
24  
25

**Table 1. Demographic characteristics of referrals who started the programme (n=153)**

|                                                | Median | IQR      |          |
|------------------------------------------------|--------|----------|----------|
| <b>Age (years)</b>                             |        | 53       | 24       |
| <b>Gender</b>                                  |        | <b>n</b> | <b>%</b> |
| Male                                           |        | 25       | 16.3%    |
| Female                                         |        | 120      | 78.4%    |
| Not stated                                     |        | 8        | 5.2%     |
| <b>Initial BMI category (kg/m<sup>2</sup>)</b> |        |          |          |
| 25.0-29.9                                      |        | 40       | 26.1%    |
| 30.0-34.9                                      |        | 73       | 47.7%    |
| 35.0-39.9                                      |        | 27       | 17.6%    |
| ≥40.0                                          |        | 10       | 6.5%     |
| Not stated                                     |        | 3        | 2.0%     |
| <b>Leisure site</b>                            |        |          |          |
| Leisure site 1 (IMD quintile 2)                |        | 69       | 45.1%    |
| Leisure site 2 (IMD quintile 3)                |        | 83       | 54.2%    |
| Not stated                                     |        | 1        | 0.7%     |
| <b>Index of multiple deprivation</b>           |        |          |          |
| 20% most deprived                              |        | 42       | 27.5%    |
| 21-40%                                         |        | 33       | 21.6%    |
| 41-60%                                         |        | 17       | 11.1%    |
| 61-80%                                         |        | 20       | 13.1%    |
| 20% least deprived                             |        | 35       | 22.9%    |
| Not stated                                     |        | 6        | 3.9%     |
| <b>Employment status</b>                       |        |          |          |
| Employed full time                             |        | 36       | 23.5%    |
| Employed part time                             |        | 24       | 15.7%    |
| Retired                                        |        | 51       | 33.3%    |
| Claiming incapacity benefit                    |        | 5        | 3.3%     |
| Claiming job seekers allowance                 |        | 6        | 3.9%     |
| Not stated                                     |        | 14       | 9.2%     |
| <b>Level of education</b>                      |        |          |          |
| Primary                                        |        | 15       | 9.8%     |
| Secondary (O level/GCSE)                       |        | 35       | 22.9%    |
| Secondary (A level)                            |        | 26       | 17.0%    |
| Further education (HND)                        |        | 24       | 15.7%    |
| Bachelors or equivalent                        |        | 21       | 13.7%    |
| Masters or equivalent                          |        | 5        | 3.3%     |
| Not stated                                     |        | 27       | 17.6%    |

Age, gender and postcode (IMD calculated by the programme provider) recorded from the referral form.

Employment and level of education self-reported by participants during the first session. The provider did not follow up missing data.

BMI and leisure site recorded by the provider. Missing data not available for analysis and presumed to be data entry errors.



1  
2  
3 1  
45 2 **Implementation effectiveness: reflections from referring healthcare professionals**  
67 3  
8

9  
10 4 Five face-to-face semi-structured interviews took place with HCPs across five referring  
11  
12 5 surgeries: two GPs, two Practice Nurses and one Health Care Assistant. HCPs perceived that  
13  
14 6 four key themes influenced the effectiveness of programme implementation: (i) difficulties  
15  
16 7 raising weight with patients, (ii) how gender affected patient engagement, (iii) availability of  
17  
18 8 information and resources, and (iv) additional barriers constraining programme promotion.  
19

20 9  
21  
2223  
24 10 Raising the issue of weight with patients:  
2526 11  
27

28 12 Concerns about raising weight may have contributed to slow recruitment, with nurses and  
29  
30 13 healthcare assistants expressing unease, *'not really up to me... well I talk about it if they want*  
31  
32 14 *to.... Better if they [patients] bring it up.'* (Interview 2, Healthcare Assistant). GPs seemed  
33  
34 15 more comfortable raising weight with patients, but with the caveat that this is easier in the  
35  
36 16 context of a longer-term GP/patient relationship.  
37

38 17 *'the people I see I've known for a very long time... it's the rapport you have...if I'd*  
3940 18 *never met anyone before and they came in for a sore throat I'm not going to say*  
4142 19 *you're fat...If there was someone I'd known for a long time and it seemed*  
4344 20 *relevant...I'd mention it.'* (Interview 5, GP).  
45  
4647 21  
48  
4950 22 Gender and engagement in the referral process:  
5152 23  
53  
54  
55  
56  
57  
58  
59  
60

1  
2  
3 1 Gender was highlighted as influencing the referral process, women being more likely than  
4  
5 2 men to seek support for weight. This may help explain the low rate of referral for males  
6  
7  
8 3 (17%):  
9

10 4 *'More women talk about it...men don't really talk about weight...I do mention weight*  
11  
12 5 *to men if I'm doing a well man [sic] but it doesn't come up really...it's a woman*  
13  
14 6 *thing...'* (Interview 3, Practice Nurse).  
15  
16  
17 7

18  
19  
20 8 Availability of information and resources:  
21  
22 9

23  
24 10 Several interviewees highlighted training needs around programme information and  
25  
26 11 resources, (e.g., additional programme information would help to engage patients). For  
27  
28 12 example, the GPs both discussed the longstanding ERS and stated they needed to become  
29  
30 13 more familiar with Momenta, as they had with the ERS:  
31  
32

33 14 *'when we get opportunities to do things in the practice we normally discuss it, let*  
34  
35 15 *everyone know where appropriate forms and information is and it's in your*  
36  
37 16 *head...that didn't happen with this and I don't know why that was.'* (Interview 5, GP).  
38  
39  
40 17

41  
42 18 All HCPs interviewed felt the referral leaflet (provided by programme providers) was  
43  
44 19 important in the process, either as a tool to promote the intervention or to convey information  
45  
46 20 to patients:  
47  
48  
49

50 21 *'The leaflet was good, bright...explained the programme and patients like taking a*  
51  
52 22 *leaflet away.'* (Interview 3, Practice Nurse)  
53  
54  
55 23

56  
57  
58  
59 24  
60

1  
2  
3 1 Additional Barriers to Engagement:  
4  
5

6 2  
7  
8

9 3 Several sub-themes highlighted additional barriers to the referral process. The most  
10  
11 4 prominent sub-themes were around initial BMI referral criteria (25.0-29.9 kg/m<sup>2</sup>) and delayed  
12  
13 programme start. Both implementation factors were beyond the control of the referrers, but  
14 5  
15 consequently amended through iterative refinement during the prototyping process following  
16 6  
17 early data analysis. Both were reported by practice nurses as exacerbating each other:  
18 7

19 8 *'we were referring but then it didn't start so people were not sure what was*  
20  
21 9 *happening [pause]...Think it was more people were needed to start...but you know if*  
22  
23 10 *the BMI was higher then there would have been more.'* (Interview 3, Practice Nurse).  
24  
25  
26  
27  
28  
29

30 12 In one case, a decision was taken to relax the referral criteria, *'...31.5 [kg/m<sup>2</sup>]...was just*  
31  
32 13 *outside so I just referred him.'* (Interview 4, GP).  
33  
34  
35  
36

37 15 Programme location was perceived by HCPs to overcome an existing barrier to the tier three  
38  
39 16 weight management programme, as Momenta was *'round the corner for people,'* as opposed  
40  
41 17 to *'a bit far away at the hospital.'* Cost barriers were also discussed, both with reference to  
42  
43 18 the patient, *'in this sort of area...cost..., if you've got to pay it's a barrier.'* (Interview 4, GP),  
44  
45  
46 19 and to expected targets from Clinical Commissioning Groups (CCG),  
47

48 20 *'we are constantly told by the CCG that we must keep down on numbers and that if*  
49  
50 21 *there are costs attached to this referral that would definitely impact... and that would*  
51  
52 22 *be for all practices.'* (Interview 5, GP)  
53  
54  
55

56 23  
57  
58  
59 24  
60

## 1 **Implementation effectiveness: reflections from participants**

2

3 Three focus groups in the leisure centres allowed programme participant voices to be heard:  
4 three females and one male from Momenta (focus group 1), three males and three females from  
5 Momenta-Fitness (focus group 2) and three females (one of whom emailed her views  
6 separately) from Fitness-only. Across the groups, 12 participants reported having lost weight  
7 and one reported weight gain. Three themes developed: (i) outcomes of the programme, (ii)  
8 facilitators and barriers to engagement, and (iii) raising the issues of weight with HCPs.

9

10 Outcomes of the programme:

11

12 Focus group findings aligned closely with quantitative outcomes in terms of the physical and  
13 psychological benefits of participation: *'[I've] lost a good bit of weight. It's been very*  
14 *positive for me... I'm feeling a lot more active...'* (Momenta-Fitness, Participant 5).

15 Participants reported a sense of weight loss achievement, increased physical activity levels,  
16 and positive mood states. In addition, elements of the Momenta programme were perceived  
17 as facilitating engagement, including the *'group feeling... I looked forward to it,'* (Momenta-  
18 Fitness, Participant 4), the *'information that we got every week... so very well planned.'*  
19 (Momenta-Fitness, Participant 3) and the ongoing support e.g., *'she phoned me the other day*  
20 *to see if I was coming,'* (Momenta-Fitness, Participant 4). Momenta participants reflected  
21 back on, and identified and discussed lifestyle factors that related to their initial weight gain  
22 (e.g., *'I did the usual thing... I started eating toffees,'* Momenta-Fitness, Participant 5),  
23 demonstrating both self-awareness and an openness to discussing the topic.

24

25 Facilitators and barriers to engagement:

1  
2  
3 1  
4  
5 2 One participant reported being initially excluded but later allowed to take part, and others  
6  
7 3 raised concerns that the initial BMI threshold for referral (25-29.9 kg/m<sup>2</sup>) was too low, '*was a*  
8  
9 4 *little bit high, BMI...managed to get it down... [and then] the doctor put us forward,*'  
10  
11 5 (Momenta, Participant 2). Data also indicated the importance of subsidised access,  
12  
13 6 particularly important in the context of a deprived region such as this, e.g., '*I also joined*  
14  
15 7 *Weight Watchers for short period of time but found the classes too expensive,*' (Fitness-only,  
16  
17 8 Participant 3, emailed response).  
18  
19  
20  
21  
22 9

23  
24 10 Raising the issue of weight with HCPs:  
25  
26 11

27  
28 12 Some data did suggest implementation was problematic, however, this focused exclusively  
29  
30 13 on the referral process. Participants overwhelmingly felt that they had opened the  
31  
32 14 conversation about weight, as opposed to discussions being initiated by HCPs (e.g., '*my*  
33  
34 15 *glucose levels were quite high but nobody ever said that I was overweight,*' Momenta-  
35  
36 16 Fitness, Participant 4). In addition, participants perceived limitations in HCPs' knowledge of  
37  
38 17 intervention components ('*she [nurse] didn't know anything about it,*' Fitness-only,  
39  
40 18 Participant 1), something with potential to impact on likelihood of referral, and  
41  
42 19 participants' expectations of programme success.  
43  
44  
45  
46  
47 20

## 48 49 21 **Preliminary outcome domains** 50 51 22

52  
53 23 Of all referrals, 153 (84%) attended the baseline measurement session and 78 (51% of those  
54  
55 24 who started) attended the 12-week measurement session. Uptake and adherence varied by  
56  
57 25 programme group (table 2).  
58  
59  
60

1 **Table 2. Programme uptake, adherence and attendance.**

| <b>Uptake (week 1), adherence and retention (both week 12)</b> | <b>Momenta-Fitness</b> |                     | <b>Momenta only</b> |                     | <b>Fitness only</b> |                     |
|----------------------------------------------------------------|------------------------|---------------------|---------------------|---------------------|---------------------|---------------------|
| Number referred                                                |                        | 58                  |                     | 59                  |                     | 65                  |
| Uptake* (n, %)                                                 |                        | 54 (93.1%)          |                     | 50 (84.7%)          |                     | 49 (75.4%)          |
| Uptake retention** (n, %)                                      |                        | 35 (64.8%)          |                     | 27 (54.0%)          |                     | 16 (32.7%)          |
| Uptake adherence^ (n, %)                                       |                        | 34 (63.0%)          |                     | 26 (52.0%)          |                     | 8 (50.0%)           |
| Overall retention*** (n, %)                                    |                        | 35 (60.3%)          |                     | 27 (45.8%)          |                     | 16 (24.6%)          |
| Overall adherence^^ (n, %)                                     |                        | 34 (58.6%)          |                     | 26 (44.1%)          |                     | 8 (12.3%)           |
| <b>Momenta session attendance</b>                              | <b>Momenta-Fitness</b> |                     | <b>Momenta only</b> |                     | <b>Fitness only</b> |                     |
|                                                                | <b>n</b>               | <b>Median (IQR)</b> | <b>n</b>            | <b>Median (IQR)</b> |                     |                     |
| Uptake                                                         | 54                     | 9.0 (7.3)           | 50                  | 9.0 (8.0)           |                     |                     |
| Dropouts                                                       | 19                     | 3.0 (3.0)           | 23                  | 3.0 (5.0)           |                     | N/A                 |
| Completers^^^                                                  | 35                     | 10.0 (2.0)          | 27                  | 11.0 (1.3)          |                     |                     |
| <b>Exercise session attendance</b>                             | <b>Momenta-Fitness</b> |                     | <b>Momenta only</b> |                     | <b>Fitness only</b> |                     |
|                                                                | <b>n</b>               | <b>Median (IQR)</b> | <b>n</b>            | <b>Median (IQR)</b> | <b>n</b>            | <b>Median (IQR)</b> |
| Uptake                                                         | 54                     | 7.0 (16.3)          | 50                  | 0.0 (4.5)           | 49                  | 0.0 (1.5)           |
| Dropouts                                                       | 19                     | 0.0 (1.0)           | 23                  | 0.0 (0.0)           | 33                  | 0.0 (0.0)           |
| Completers^^^                                                  | 35                     | 10.0 (14.0)         | 26                  | 0.0 (5.0)           | 16                  | 4.5 (18.0)          |

*Uptake\** participant attended baseline assessment; *Uptake retention\*\** % of participants who attended the 12-week assessment out of those who attended the baseline assessment; *Uptake adherence^* % of participants who attended the baseline assessment who also attended  $\geq 8$  Momenta sessions (Momenta-Fitness and Momenta only) or gym sessions (fitness only); *Overall retention\*\*\** % of all those referred who attended both baseline and 12-week assessment; *Overall adherence^^* % of all those referred who attended  $\geq$  eight Momenta sessions (Momenta-Fitness and Momenta only) or exercise sessions (fitness only); *Completers^^^* those who completed the 12-week assessment

3  
4 Physiological and psychological data were not normally distributed. Quantitative data are  
5 presented as exploratory, due to the small sample size and are presented here for information  
6 and general description. No significant differences were found between programme groups  
7 either at baseline or at 12 weeks, for any measures. Despite the small sample size, significant  
8 within-group differences between baseline and 12 weeks were evident for weight, BMI and  
9 waist circumference for Momenta-Fitness, and Momenta (Table 3). Follow-up analysis at 52-  
10 weeks (available sub-sample) showed changes were maintained for Momenta-Fitness ( $n=18$ )  
11 only.

12

1 **Table 3. Weight, BMI and waist circumference change.**

| <b>End of programme results</b> | <b>Median (IQR)<br/>Baseline</b> | <b>Median (IQR)<br/>12 weeks</b> | <b>z</b> | <b>p</b> | <b>Median (IQR)<br/>Change</b> |
|---------------------------------|----------------------------------|----------------------------------|----------|----------|--------------------------------|
| <b>Weight (kg)</b>              |                                  |                                  |          |          |                                |
| Momenta-Fitness (n=35)          | 88.9 (80.5 - 100.0)              | 88.0 (77.2 - 95.8)               | -4.531   | <0.001   | -2.9 (-5.1 - -1.6)             |
| Momenta only (n=26)             | 87.8 (74.5 - 77.0)               | 83.3 (74.5 - 92.5)               | -4.344   | <0.001   | -2.9 (-5.0 - -2.0)             |
| Fitness only (n=15)             | 76.2 (71.6 - 86.9)               | 76.6 (70.4 - 84.6)               | -0.879   | 0.379    | 0.0 (-3.2 - 1.0)               |
| <b>BMI (kg/m<sup>2</sup>)</b>   |                                  |                                  |          |          |                                |
| Momenta-Fitness (n=35)          | 32.0 (30.3 - 35.7)               | 31.3 (29.2 - 35.3)               | -4.494   | <0.001   | -1.1 (-1.9 - -0.6)             |
| Momenta only (n=26)             | 32.0 (30.0 - 34.5)               | 31.3 (28.6 - 33.6)               | -4.356   | <0.001   | -1.2 (-1.6 - -0.8)             |
| Fitness only (n=14)             | 29.2 (27.3 - 33.0)               | 29.7 (27.0 - 33.3)               | -0.454   | 0.650    | 0.1 (-1.2 - +0.4)              |
| <b>Waist circumference (cm)</b> |                                  |                                  |          |          |                                |
| Momenta-fitness (n=35)          | 106.0 (98.0 - 115.0)             | 99.0 (93.0 - 110.0)              | -4.996   | <0.001   | -7.0 (-9.5 - -5.0)             |
| Momenta only (n=25)             | 108.0 (99.5 - 114.5)             | 101.0 (93.8 - 111.5)             | -4.166   | <0.001   | -5.0 (-7.3 - -2.5)             |
| Fitness only (n=11)             | 90.0 (87.0 - 95.0)               | 91.0 (90.0 - 96.0)               | 0.358    | 0.650    | 1.0 (-3.0 - 3.0)               |
| <b>52-week follow-up</b>        | <b>Median (IQR)<br/>Baseline</b> | <b>Median (IQR)<br/>52 weeks</b> | <b>z</b> | <b>p</b> | <b>Median (IQR)<br/>Change</b> |
| <b>Weight (kg)</b>              |                                  |                                  |          |          |                                |
| Momenta-Fitness (n=18)          | 95.2 (87.1 - 101.4)              | 91.4 (82.7 - 95.9)               | -3.006   | <0.001   | -4.8 (-6.2 - -1.5)             |
| Momenta only (n=16)             | 84.7 (72.3 - 95.2)               | 82.7 (73.2 - 94.6)               | -1.533   | 0.120    | -0.7 (-7.6 - 0.8)              |
| *Fitness only (n=3)             | 73.4 (69.5 - 80.2)               | 70.3 (66.0 - 87.0)               |          |          | 0.9 (-7.4 - 6.9)               |
| <b>BMI (kg/m<sup>2</sup>)</b>   |                                  |                                  |          |          |                                |
| Momenta-Fitness (n=18)          | 32.0 (30.49 - 35.1)              | 30.8 (28.7 - 34.0)               | -3.157   | <0.05    | -1.7 (-2.0 - -0.6)             |
| Momenta only (n=16)             | 31.7 (29.3 - 33.9)               | 31.1 (26.7 - 33.6)               | -1.603   | 0.109    | -0.3 (-2.3 - 0.3)              |
| *Fitness only (n=3)             | 27.6 (27.5 - 30.5)               | 27.8 (24.8 - 33.2)               |          |          | 0.3 (24.8 - 33.2)              |
| <b>Waist circumference (cm)</b> |                                  |                                  |          |          |                                |
| Momenta-Fitness (n=18)          | 109.0 (101.0 - 114.8)            | 100.5 (94.8 - 107.3)             | -3.221   | <0.001   | -6.0 (-13.3 - -1.75)           |
| Momenta only (n=16)             | 106.0 (94.5 - 115.8)             | 103.5 (98.5 - 113.3)             | -0.780   | 0.938    | -2.5 (-9.0 - -10.0)            |
| *Fitness only (n=3)             | 89.0 (87.0 - 95.0)               | 90.0 (90.0 - 101.0)              |          |          | 3.0 (90.0 - 101.0)             |

\* Fitness only n=3 therefore median and range reported and no statistical test completed.

3  
4 Differences in mental wellbeing, depression and anxiety were not apparent between groups,  
5 however improvements in mental wellbeing, and reductions in depression and anxiety were  
6 evident between baseline and 12 weeks for Momenta-Fitness, and Momenta groups only  
7 (Table 4), although the magnitude of change was similar for all groups. The changes  
8 observed, though small, could be argued to be functionally and clinically meaningful, with a  
9 minimal important difference of 1.5 points previously identified for the HADS, for  
10 example<sup>35</sup>. 52-week sub-sample analysis showed that significant improvements for wellbeing

1 and depression were maintained for Momenta-Fitness (n=18), and wellbeing and anxiety for  
2 Momenta (n=16).

3

4 **Table 4. Wellbeing, anxiety and depression measures change.**

| End of programme results      | Median (IQR)<br>Baseline | Median (IQR)<br>12 weeks | z      | p      | Median (IQR)<br>Change |
|-------------------------------|--------------------------|--------------------------|--------|--------|------------------------|
| <b>Mental wellbeing scale</b> |                          |                          |        |        |                        |
| Momenta-Fitness (n=29)        | 46.0 (40.0 - 51.5)       | 53.0 (40.0 - 51.5)       | 3.810  | <0.001 | 5.0 (1.5 - 12.0)       |
| Momenta only (n=23)           | 49.0 (39.0 - 58.0)       | 55.0 (51.0 - 63.0)       | 2.818  | <0.05  | 6.0 (-1.0 - 10.0)      |
| Fitness only (n=13)           | 47.0 (40.5 - 59.5)       | 46.0 (42.0 - 63.5)       | 0.157  | 0.875  | 0.0 (-4.0 - 5.0)       |
| <b>Anxiety scale</b>          |                          |                          |        |        |                        |
| Momenta-Fitness (n=28)        | 5.5 (4.0 - 9.8)          | 4.5 (2.0 - 7.0)          | -3.027 | <0.001 | -1.0 (-3.0 - 1.0)      |
| Momenta only (n=23)           | 8.0 (6.0 - 10.0)         | 4.0 (2.5 - 9.0)          | -2.329 | <0.05  | -1.0 (-3.0 - 0.0)      |
| Fitness only (n=13)           | 8.0 (3.5 - 10.0)         | 6.0 (4.0 - 9.0)          | -0.499 | 0.618  | -1.0 (-2.0 - 2.0)      |
| <b>Depression scale</b>       |                          |                          |        |        |                        |
| Momenta-Fitness (n=28)        | 5.5 (3.3 - 8.0)          | 2.0 (1.0 - 6.0)          | -3.214 | <0.05  | -2.5 (-4.8 - -0.3)     |
| Momenta only (n=23)           | 5.0 (3.0 - 7.5)          | 3.0 (1.0 - 5.0)          | -3.049 | <0.05  | -1.0 (-4.5 - 1.0)      |
| Fitness only (n=13)           | 4.0 (2.0 - 8.5)          | 2.0 (2.0 - 7.0)          | -1.226 | 0.220  | -2.0 (-4.5 - 0.0)      |
| 52-week follow-up             | Median (IQR)<br>Baseline | Median (IQR)<br>52 weeks | z      | p      | Median (IQR)<br>Change |
| <b>Mental wellbeing scale</b> |                          |                          |        |        |                        |
| Momenta-Fitness (n=15)        | 44.0 (39.0 - 52.0)       | 55.0 (48.0 - 59.0)       | 2.984  | <0.05  | 5.0 (3.0 - 15.0)       |
| Momenta only (n=13)           | 58.0 (47.5 - 59.0)       | 56.0 (54.0 - 63.5)       | 2.282  | <0.05  | 4.0 (0.5 - 6.5)        |
| *Fitness only (n=3)           | 47.0 (34.0 - 64.0)       | 58.0 (45.0 - 60.0)       |        |        | -2.0 (-6.0 - 26.0)     |
| <b>Anxiety scale</b>          |                          |                          |        |        |                        |
| Momenta-Fitness (n=15)        | 6.0 (2.0 - 10.0)         | 2.0 (1.0 - 7.0)          | -1.785 | 0.074  | -3.0 (-6.0 - 0.0)      |
| Momenta only (n=15)           | 7.0 (4.0 - 9.0)          | 5.0 (1.0 - 8.0)          | -1.990 | <0.05  | -3.0 (-4.0 - 0.0)      |
| *Fitness only (n=3)           | 9.0 (5.0 - 10.0)         | 2.0 (1.0 - 8.0)          |        |        | -3.0 (-8.00 - -2.0)    |
| <b>Depression scale</b>       |                          |                          |        |        |                        |
| Momenta-Fitness (n=15)        | 7.0 (3.3 - 11.3)         | 3.5 (1.0 - 6.0)          | -2.908 | <0.05  | -3.5 (-6.3 - -0.8)     |
| Momenta only (n=15)           | 4.0 (1.0 - 6.0)          | 3.0 (1.0 - 4.0)          | -0.762 | 0.446  | 0.0 (-2.0 - 1.0)       |
| *Fitness only (n=3)           | 3.0 (0.0 - 8.0)          | 2.0 (1.0 - 8.0)          |        |        | 1.0 (-8.0 - 5.0)       |

\* Fitness only n=3 therefore median and range reported and no statistical test completed.

6

7

8 Overall, the results suggested those who participated in the two groups incorporating  
9 Momenta, had enhanced physical and psychological health indicators from baseline, whereas  
10 those who had only free fitness membership did not. From the small follow-up sample, there



1  
2  
3 1 is scope to suggest that the combination of Momenta and fitness membership may produce  
4  
5 2 favourable outcomes at 52 weeks.  
6  
7  
8 3

#### 4 **Iterative refinements throughout the evaluation process**

5

6 Here we list a number of implementation adjustments which were made throughout the  
7 evaluation process, facilitated via the prototyping framework. Real-time advice from  
8 Commissioners was considered during early stages of implementation, regarding the nature  
9 of comparison offers (e.g. fitness access) and thus initial design and outcome measurements  
10 were adapted prior to referrals being made. To better-target recruitment and change the  
11 process of engagement at referral point, entry criteria were altered ( $\text{BMI} \geq 30 \text{ kg/m}^2$ ) mid-way  
12 through programme delivery. On-site implementation of the service offer was adapted in  
13 response to delivery staff feedback: increased resource was made available, for example  
14 additional staffing to support delivery for the first wave of referrals. Furthermore, staff were  
15 given additional time for Momenta session preparation and session delivery times were  
16 extended. Follow-up activities (i.e., text or telephone contact) were implemented by staff  
17 during the process, to encourage adherence.  
18

#### 19 **DISCUSSION**

20

21 We explored 'prototyping', as a cost-effective and time-efficient approach to public health  
22 evaluation, via an 'off-the-shelf' weight management programme implemented in a local  
23 context of mixed and high deprivation.  
24

1 Experiences of both referrers and referrals highlighted that HCPs needed to be better-  
2 informed and more confident raising weight-related conversations. Whilst patient-led action  
3 is desirable, staff reluctance to raise weight issues may mean that opportunities for  
4 engagement of less knowledgeable or motivated patients will be missed. The problematic  
5 positioning of GPs within obesity care has been highlighted previously,<sup>36</sup> with a range of  
6 strategies to change HCPs' behaviour resulting in little or no change to patients' weight. A  
7 practical training need is highlighted for those working at the patient-practitioner interface,  
8 however communication with patients about weight may well be hindered by the 'stigma'  
9 attached to obesity.<sup>37</sup> This has wider implications for patient outcomes and requires further  
10 exploration through the implementation process. Additionally, HCPs need better  
11 understanding of referral-based public health programmes offered. Despite efforts of  
12 programme and public health managers, awareness was reportedly low for some referring  
13 professionals. We suggest consideration of resource-efficient ways to signpost both HCPs  
14 and patients themselves as part of the implementation process.

15  
16 This programme was delivered across a social gradient in a region with low health indices  
17 and areas of high deprivation. Some issues in relation to inequalities and service access for  
18 future community-based weight management programmes were highlighted. Only 17% of  
19 referrals to Momenta were males. Gender bias in weight management referral has been  
20 reported elsewhere,<sup>38-39</sup> and interviews showed that practitioners struggled to raise the topic  
21 of weight with male patients. Alternative referral strategies have been employed in other  
22 settings in an attempt to overcome this.<sup>40</sup> Marketing in other community spaces, or targeted  
23 postal referrals could be explored in future implementation. The initial decision to restrict  
24 referral to overweight-only substantially impacted on referral rates, with HCPs and referrals  
25 indicating they felt limited until this restriction was reversed. Had this continued, worsening

1 health inequalities may have been an unintended consequence, something to be actively  
2 avoided within public health programmes <sup>41</sup>. The roles of, and interactions between, those  
3 operating in the 'system' (i.e. the context within which the intervention operates) must be  
4 considered at the point of implementation to minimise any impact from unintended  
5 consequences.<sup>5</sup> In practical terms, this may be through continued dialogue with  
6 commissioners, referring professionals and referrals themselves, something which  
7 prototyping evaluation allows.

8  
9 Quantitative data should be interpreted as exploratory, due to the relatively small number of  
10 complete cases, however lessons can be learned from these data both in terms of preliminary  
11 outcomes and engagement/dropout. Participation in Momenta and Momenta-Fitness resulted  
12 in 12-week weight loss for those who completed the programme. Free fitness membership  
13 without the weight-management programme was poorly engaged with and did not lead to  
14 weight change. A small sub-sample who attended follow-up demonstrated that after one year,  
15 weight reductions equivalent to ~4% could be maintained for Momenta-Fitness. We caution  
16 that while this might be best interpreted as hypothesis-generating for future evaluations,  
17 given these effects emerged despite an underpowered sample it is worth briefly considering  
18 potential mechanisms here. Providing free access to fitness facilities alongside the behaviour  
19 change programme may allow for continuous and self-driven behaviour change<sup>42</sup> and  
20 sustaining optimal changes in adiposity over 12 months in those who remained engaged.<sup>43</sup>  
21 Swipe card monitoring during the initial 12-week period indicated that fitness sessions were  
22 accessed an average 10 occasions for this group, whereas no access was apparent for  
23 Momenta, despite Momenta sessions being held in leisure centres. This could be important  
24 for community providers making decisions about delivery location. Both Momenta groups  
25 reported improved wellbeing, and reduced anxiety and depression at 12-weeks suggesting

1 that the behavioural intervention may drive this effect. This is consistent with previous work  
2 reporting co-varying changes in weight loss, depression, and quality of life in weight  
3 management services.<sup>44</sup> It is unclear whether the primary mechanism was weight loss, or the  
4 wider social benefits of participation. Both were valued in the qualitative data. Our  
5 preliminary evidence of maintained improvements in wellbeing for these groups at 52 weeks  
6 is particularly relevant given previously evidenced associations between poor mental health,  
7 and obesity and overweight status.<sup>45</sup> Long-term follow-up rates will need to be considered in  
8 future similar programmes and we suggest year-long follow-up (at least) is included as a key  
9 programme component from the outset. Consideration should be given to how providers can  
10 maintain contact with participants after programme end to increase likelihood of successful  
11 follow-up. Potential 'light touch' support after 12 weeks may be helpful and other means of  
12 obtaining follow-up data should be explored where service users disengage. Reasons for  
13 disengagement might also be usefully explored in future work.

14  
15 Given that no systematic problems emerged with service-user's experiences of the  
16 programme itself, our findings lend support to a streamlined approach to involvement of all  
17 stakeholders in programme implementation. We suggest that prototyping demonstrates  
18 opportunities for off-the-shelf programmes to be pragmatically moulded to local context, in  
19 real-time. Many of the iterative changes made were staff-driven. This demonstrates that real-  
20 time consideration of feedback from on-site delivery teams can be important to the  
21 implementation process. Some of the adjustments required commissioning action, as they had  
22 resource implications; others needed advice from the evaluation team. Interestingly changes  
23 made throughout the process generally focused on both staff and participant experience.

24

1  
2  
3 1 Emergence of some negative experiences of referral suggests, however, that prototyping can  
4  
5 2 be problematic without networks or channels for ensuring key outcomes are widely  
6  
7 3 communicated to relevant stakeholders. Overall, the evaluation demonstrated that a balance is  
8  
9 4 needed to allow quick and efficient adaptation of off-the-shelf programmes, but with focused  
10  
11 5 professional user engagement in the early stages of development. The prototyping approach  
12  
13 6 had particular utility given that project resources were limited and meant that issues were  
14  
15 7 identified and acted upon rapidly. While the programme may have progressed similarly  
16  
17 8 without this, prototyping provided a greater structure for, and confidence in, on-going  
18  
19 9 refinements. This was achieved via the support provided by academics, public health  
20  
21 10 practitioners and providers. Fundamentally, adopting a prototyping approach enabled the  
22  
23 11 delivery of a new service to an in-need population, alongside the generation of initial  
24  
25 12 evidence of local effectiveness. A minimum of 1 kg weight-loss at 3 months, and 0.7 kg at  
26  
27 13 12-months have been suggested as thresholds to influence decisions over commissioning of  
28  
29 14 weight-loss services.<sup>46</sup> Our preliminary data suggests that Momenta may have potential to  
30  
31 15 meet or even exceed these thresholds, showing particular promise when implemented in  
32  
33 16 conjunction with free fitness provision.  
34  
35  
36  
37  
38  
39  
40  
41

42 18 Demonstrating preliminary effectiveness is of limited use, however, unless a successful  
43  
44 19 programme in one area may be adapted and implemented to suit a different context, for  
45  
46 20 example through sharing local-level knowledge, interactions and behaviours of individuals  
47  
48 21 within different parts of that system.<sup>47</sup> The process for scaling-up of effective health  
49  
50 22 interventions to broader policy and practice takes years<sup>48</sup> and certainly within the obesity  
51  
52 23 literature, has been dominated by initiatives that consider effectiveness but not  
53  
54 24 implementation across specific settings.<sup>49-50</sup> We recommend prototyping might be built into  
55  
56  
57  
58  
59  
60

1 larger public health evaluations providing that the original programme has a sound theoretical  
2 basis, and iterative refinement is engaged with by all stakeholders from the outset.

## 4 **CONCLUSION**

6 The Momenta programme was experienced positively by those who attended. Issues with the  
7 referral process need to be explored further, however other refinements were feasible during  
8 delivery. Promising preliminary outcome data for ‘Momenta’, particularly in conjunction  
9 with a free fitness offer, implies potential for the scheme within future commissioning. This  
10 evaluation extends the literature by exploring prototyping for a complex problem, community  
11 weight-management, in a challenging setting, demonstrating streamlined implementation of  
12 an ‘off-the-shelf’ weight management programme. This resource-effective approach is  
13 highly relevant in the context of health inequalities and public health sector funding  
14 constraints.

1 **Acknowledgements:** Many thanks to Jordan Bell, Nicole Rowley and Ross Davison, who  
2 collected and collated raw quantitative data.

3  
4 **Author Contributions:** CDR, CH and EO contributed to design of the quantitative  
5 evaluation, data analysis and preparation the final document. LN contributed to design and  
6 analyses of the qualitative evaluation component. TF contributed to qualitative design and  
7 analysis and preparation of the final document. AL contributed to design of the quantitative  
8 evaluation and preparation of the final document.

9  
10 **Funding:** The quantitative evaluation component was supported by funding from the  
11 Wolfson Research Institute for Health and Wellbeing, Durham University. Amelia Lake is a  
12 member of Fuse, the Centre for Translational Research in Public Health  
13 (www.fuse.ac.uk). Fuse is a UK Clinical Research Collaboration (UKCRC) Public Health  
14 Research Centre of Excellence. Funding for Fuse from the British Heart Foundation, Cancer  
15 Research UK, Economic and Social Research Council, Medical Research Council, the  
16 National Institute for Health Research, under the auspices of the UKCRC, is gratefully  
17 acknowledged. The views expressed in this paper do not necessarily represent those of the  
18 funders or UKCRC. The funders had no role in study design, data collection and analysis,  
19 decision to publish, or preparation of the manuscript.

20  
21 **Competing interests:** CH is a former employee of the Leisure Trust and was instrumental in  
22 initiating the evaluation. She was subsequently employed as a research assistant at Durham  
23 University, however was not involved in any data collection or entry, only accessing an  
24 anonymised database submitted to the University. LN was a Public Health Improvement

1  
2  
3 1 Manager within the Public Health Team and had responsibility for commissioning the  
4  
5 2 Momenta programme. The qualitative evaluation component was submitted in partial  
6  
7 3 fulfilment of her Master's in Public Health at Newcastle University.  
8  
9  
10  
11 4

12  
13 5 **Participant consent:** Consent was obtained for face-to-face interviews and focus groups.  
14  
15 6 Service users were informed in writing of the nature of the quantitative service evaluation and  
16  
17 7 how to withdraw from it. The presented data are anonymised with risk of identification low.  
18  
19  
20  
21 8

22  
23  
24 9 **Ethics approval:** Ethical advice was sought from the local Research Manager of North of  
25  
26 10 England Commissioning Support, and this project was classed as a service evaluation in line  
27  
28 11 with National Research Ethics Service guidance.  
29  
30  
31 12

32  
33  
34 13 **Data availability statement:** No additional data are available because this was a service  
35  
36 14 evaluation.  
37  
38  
39  
40 15



1  
2  
3 1 **REFERENCES**  
4  
5 2  
6 3  
7 4  
8 1. Haines A, Kuruvilla S, Borchert M. Bridging the implementation gap between knowledge  
9 and action for health. (Theme Papers). *Bull World Health Organ* 2004;82:724.  
10  
11  
12  
13  
14 6 2. Curran GM, Bauer M, Mittman B, *et al.* Effectiveness-implementation Hybrid Designs:  
15  
16 7 Combining Elements of Clinical Effectiveness and Implementation Research to Enhance  
17  
18 8 Public Health Impact. *Med Care* 2012;50:217-26.  
19  
20  
21  
22  
23 9 3. Sales A, Smith J, Curran G, *et al.* Models, Strategies, and Tools: Theory in Implementing  
24  
25 10 Evidence-Based Findings into Health Care Practice. *J Gen Int Med* 2006;21:S43-S9.  
26  
27  
28  
29  
30 11 4. Kilbourne AM, Neumann MS, Pincus HA, *et al.* Implementing evidence-based  
31  
32 12 interventions in health care: application of the replicating effective programs framework.  
33  
34 13 *Implement Sci* 2007;2:42.  
35  
36 14  
37  
38  
39  
40  
41 15 5. Medical Research Council. Developing and evaluating complex interventions: new  
42  
43 16 guidance. UK: Medical Research Council, 2006.  
44  
45 17 <https://mrc.ukri.org/documents/pdf/developing-and-evaluating-complex-interventions/>.  
46  
47 18 (Accessed 10 Aug 2018)  
48  
49  
50 19  
51  
52  
53  
54 20 6. Oliver K, Kothari A, Mays N. The dark side of coproduction: do the costs outweigh the  
55  
56 21 benefits for health research? *Health Research Policy and Systems* 2019;17:33.  
57  
58  
59  
60

- 1  
2  
3 1  
4  
5  
6  
7  
8 2 7. Meisinger C, Döring A, Thorand B, *et al.* Body fat distribution and risk of type 2 diabetes  
9  
10 3 in the general population: are there differences between men and women? The  
11  
12 4 MONICA/KORA Augsburg Cohort Study. *Am J Clin Nutr* 2006;84:483-9.  
13  
14  
15  
16 5 8. Bhaskaran K, Douglas I, Forbes H, *et al.* Body-mass index and risk of 22 specific  
17  
18 6 cancers: a population-based cohort study of 5.24 million UK adults. *Lancet*  
19  
20 7 2014;384:755-65.  
21  
22  
23  
24  
25 8 9. Zhang C, Rexrode KM, Van Dam RM, *et al.* Abdominal obesity and the risk of all-cause,  
26  
27 9 cardiovascular, and cancer mortality: sixteen years of follow-up in US women. *Circ*  
28  
29 10 2008;117:1658-67.  
30  
31  
32  
33  
34 11 10. Kolotkin RL, Andersen JR. A systematic review of reviews: exploring the relationship  
35  
36 12 between obesity, weight loss and health-related quality of life. *Clin Obes* 2017;7:273-89.  
37  
38  
39  
40  
41 13 11. Simon GE, Von Korff M, Saunders K, *et al.* Association between obesity and psychiatric  
42  
43 14 disorders in the us adult population. *Arch Gen Psychiatry* 2006;63(7):824-30.  
44  
45  
46  
47 15 12. Public Health England. *Health matters: obesity and the food environment environment.*  
48  
49 16 UK: Public Health England, 2017. [https://www.gov.uk/government/publications/health-](https://www.gov.uk/government/publications/health-matters-obesity-and-the-food-environment/health-matters-obesity-and-the-food-environment--2)  
50  
51 17 [matters-obesity-and-the-food-environment/health-matters-obesity-and-the-food-](https://www.gov.uk/government/publications/health-matters-obesity-and-the-food-environment/health-matters-obesity-and-the-food-environment--2)  
52  
53 18 [environment--2.](https://www.gov.uk/government/publications/health-matters-obesity-and-the-food-environment/health-matters-obesity-and-the-food-environment--2) (Accessed 10 Aug 2018)  
54  
55  
56  
57  
58  
59  
60

- 1  
2  
3 1 13. World Health Organisation. *Global status report on noncommunicable diseases 2014*.  
4  
5 2 Geneva: World Health Organisation, 2014.  
6  
7  
8 3 [https://apps.who.int/iris/bitstream/handle/10665/148114/9789241564854\\_eng.pdf;jsessio](https://apps.who.int/iris/bitstream/handle/10665/148114/9789241564854_eng.pdf;jsessionid=A043D0E63AACA67752CC3294A1EBD7A3?sequence=1)  
9  
10 4 [nid=A043D0E63AACA67752CC3294A1EBD7A3?sequence=1](https://apps.who.int/iris/bitstream/handle/10665/148114/9789241564854_eng.pdf;jsessionid=A043D0E63AACA67752CC3294A1EBD7A3?sequence=1). (Accessed 04 Feb 2019)  
11  
12  
13  
14 5 14. Bambra C, Hillier F, Cairns J, *et al*. How effective are interventions at reducing  
15  
16 6 socioeconomic inequalities in obesity among children and adults? Two systematic  
17  
18 7 reviews. *Public Health Res* 2015;3.  
19  
20  
21  
22  
23 8 15. Bull ER, Dombrowski SU, McCleary N, *et al*. Are interventions for low-income groups  
24  
25 9 effective in changing healthy eating, physical activity and smoking behaviours? A  
26  
27 10 systematic review and meta-analysis. *BMJ Open*. 2014;4:e006046.  
28  
29  
30  
31  
32 11 16. Office for National Statistics. *Dataset: Regional gross value added (balanced) by*  
33  
34 12 *combined authority in the UK*. UK: Office for National Statistics, 2017.  
35  
36 13 [https://www.ons.gov.uk/economy/grossvalueaddedgva/datasets/regionalgrossvalueaddedb](https://www.ons.gov.uk/economy/grossvalueaddedgva/datasets/regionalgrossvalueaddedbalancedbycombinedauthorityintheuk)  
37  
38 14 [alancedbycombinedauthorityintheuk](https://www.ons.gov.uk/economy/grossvalueaddedgva/datasets/regionalgrossvalueaddedbalancedbycombinedauthorityintheuk). (Accessed 10 Aug 2018)  
39  
40  
41  
42  
43 15 17. Public Health England. *Work, worklessness and health: local infographic tool*. UK:  
44  
45 16 Public Health England, 2018. [https://www.gov.uk/government/publications/work-](https://www.gov.uk/government/publications/work-worklessness-and-health-local-infographic-tool)  
46  
47 17 [worklessness-and-health-local-infographic-tool](https://www.gov.uk/government/publications/work-worklessness-and-health-local-infographic-tool). (Accessed 10 Aug 2018)  
48  
49  
50  
51  
52 18 18. Northumberland County Council. *Public Health Service Statement 2017/18*.  
53  
54 19 Northumberland: Northumberland County Council, 2017.  
55  
56 20 <https://northumberland.gov.uk/NorthumberlandCountyCouncil/media/About-the->  
57  
58  
59  
60

- 1  
2  
3 1 Council/Performance/Service%20Statements%202016/2017-Public-Health-Service-  
4  
5 2 Statement-2017-18.pdf. (Accessed 10 Aug 2018)  
6  
7  
8  
9  
10 3 19. Public Health England. *Local Authority Health Profiles*. UK: Public Health England,  
11  
12 4 2019. <https://fingertips.phe.org.uk/profile/health->  
13  
14 5 [profiles/data#page/0/gid/1938132701/pat/6/par/E12000001/ati/102/are/E06000057/iid/10](https://fingertips.phe.org.uk/profile/health-profiles/data#page/0/gid/1938132701/pat/6/par/E12000001/ati/102/are/E06000057/iid/101/age/169/sex/4)  
15  
16 6 [101/age/169/sex/4](https://fingertips.phe.org.uk/profile/health-profiles/data#page/0/gid/1938132701/pat/6/par/E12000001/ati/102/are/E06000057/iid/101/age/169/sex/4). (Accessed 01 Feb 2019)  
17  
18  
19  
20  
21 7 20. Lister C, Payne H, Hanson CL, *et al*. The Public Health Innovation Model: Merging  
22  
23 8 Private Sector Processes with Public Health Strengths. *Front Public Health* 2017;5:192.  
24  
25  
26  
27 9 21. Parry GJ, Carson-Stevens A, Luff DF, *et al*. Recommendations for evaluation of health  
28  
29 10 care improvement initiatives. *Acad Pediatr* 2013 Nov-Dec;13(6 Suppl):S23-30.  
30  
31  
32  
33  
34 11 22. Hawkins J, Madden K, Fletcher A, *et al*. Development of a framework for the co-  
35  
36 12 production and prototyping of public health interventions. *BMC Public Health*  
37  
38 13 2017;17:689.  
39  
40  
41  
42  
43 14 23. Stevens VJ, Funk KL, Brantley PJ, *et al*. Design and implementation of an interactive  
44  
45 15 website to support long-term maintenance of weight loss. *J Med Internet Res*  
46  
47 16 2008;10(1):e1.  
48  
49  
50  
51  
52 17 24. Discover Momenta Ltd. *Momenta*. UK: Discover Momenta Ltd, 2013:  
53  
54 18 <http://discovermomenta.com/>. (Accessed 10 Aug 2018)  
55  
56  
57  
58  
59  
60

- 1  
2  
3 1 25. Hanson CL. *Advancing understanding of effective exercise on referral: a mixed methods*  
4 *evaluation of the Northumberland scheme*. PhD Thesis, Durham University, 2017.  
5  
6 2  
7 <http://etheses.dur.ac.uk/12162/>. (Accessed 10 Aug 2018)  
8  
9  
10  
11  
12 4 26. Hanson CL, Allin LJ, Ellis JG, *et al*. An evaluation of the efficacy of the exercise on  
13  
14 5 referral scheme in Northumberland, UK: association with physical activity and predictors  
15  
16 6 of engagement. A naturalistic observation study. *BMJ Open* 2013;3:e002849  
17  
18  
19  
20  
21 7 27. Sacher PM, Kolotourou M, Chadwick PM, *et al*. Randomized Controlled Trial of the  
22  
23 8 MEND Program: A Family-based Community Intervention for Childhood Obesity. *Obes*  
24  
25 9 2012;18:S62-S8.  
26  
27  
28  
29  
30 10 28. Leech N, Onwuegbuzie A. A typology of mixed methods research designs. *Qual Quant*  
31  
32 11 2009;43:265-75.  
33  
34  
35  
36 12 29. Marfell-Jones M, Olds T, Stewart A, *et al*. *International Standards for Anthropometric*  
37  
38 13 *Assessment (2007)*. Potchefstroom, South Africa: International Society for the  
39  
40 14 Advancement of Kinanthropometry, 2007.  
41  
42  
43  
44  
45 15 30. Tong A, Sainsbury P, Craig J. Consolidated criteria for reporting qualitative research  
46  
47 16 (COREQ): a 32-item checklist for interviews and focus groups. *Int J Qual. Health Care*  
48  
49 17 2007;19:349–57  
50  
51  
52  
53  
54 18  
55  
56  
57  
58  
59  
60

- 1  
2  
3 1 31. World Health Organisation. *BMI Classification 2006*. Geneva: World Health  
4  
5 2 Organisation, 2006. [http://apps.who.int/bmi/index.jsp?introPage=intro\\_3.html](http://apps.who.int/bmi/index.jsp?introPage=intro_3.html). (Accessed  
6  
7 3 10 Aug 2018)  
8  
9  
10  
11  
12 4 32. Clarke A, Friede T, Putz R, *et al*. Warwick-Edinburgh Mental Well-being Scale  
13  
14 5 (WEMWBS): Validated for teenage school students in England and Scotland. A mixed  
15  
16 6 methods assessment. *BMC Public Health* 2011;11:487.  
17  
18  
19  
20  
21 7 33. Zigmond AS, Snaith RP. The Hospital Anxiety and Depression Scale. *Acta Psychiatr*  
22  
23 8 *Scand* 1983;67:361-70.  
24  
25  
26  
27  
28 9 34. Braun V, Clarke V. Using thematic analysis in psychology. *Qual Res Psychol* 2006;3:77-  
29  
30 10 101.  
31  
32  
33  
34 11 35. Puhan MA, Frey M, Buchi S *et al*. The minimal important difference of the hospital  
35  
36 12 anxiety and depression scale in patients with chronic obstructive pulmonary disease.  
37  
38 13 Health and Quality of Life Outcomes 2008;6:46:10.1186/1477-7525-6-46  
39  
40  
41  
42  
43 14 36. Flodgren G, Goncalves BDC, Summerbell CD. Interventions to change the behaviour of  
44  
45 15 health professionals and the organisation of care to promote weight reduction in children  
46  
47 16 and adults with overweight or obesity. *Cochrane Database of Syst Rev*  
48  
49 17 2017;11:CD000984.  
50  
51  
52  
53  
54 18 37. Phelan SM, Burgess DJ, Yeazel MW, *et al*. Impact of weight bias and stigma on quality  
55  
56 19 of care and outcomes for patients with obesity. *Obes Rev* 2015;16:319-26.  
57  
58  
59  
60

- 1  
2  
3 1 38. Logue J, Allardice G, Gillies M, *et al.* Outcomes of a specialist weight management  
4 programme in the UK National Health Service: prospective study of 1838 patients. *BMJ*  
5  
6 2 *Open* 2014;4:e003747.  
7  
8 3  
9  
10  
11  
12 4 39. Lebrun LA, Chowdhury J, Sripipatana A, *et al.* Overweight/obesity and weight-related  
13 treatment among patients in U.S. federally supported health centers. *Obes Res Clin Pract*  
14 5  
15 2013;7:e377-e90.  
16 6  
17  
18  
19  
20  
21 7 40. Ahern AL, Aveyard P, Boyland EJ, *et al.* Inequalities in the uptake of weight  
22 management interventions in a pragmatic trial: an observational study in primary care. *Br*  
23 8  
24 *J Gen Pract* 2016;66(645):e258-63.  
25 9  
26  
27  
28  
29  
30 10 41. Adams J, Mytton O, White M, *et al.* Why Are Some Population Interventions for Diet  
31 and Obesity More Equitable and Effective Than Others? The Role of Individual Agency.  
32 11  
33 *PLoS Med* 2016;13(4).  
34 12  
35  
36  
37  
38  
39 13 42. Mastellos N, Gunn LH, Felix LM, *et al.* Transtheoretical model stages of change for  
40 dietary and physical exercise modification in weight loss management for overweight and  
41 14  
42 obese adults. *Cochrane Database Syst Rev* 2014;2:CD008066  
43 15  
44  
45  
46  
47  
48 16 43. Garrow JS, Summerbell CD. Meta-analysis: effect of exercise, with or without dieting, on  
49 the body composition of overweight subjects. *Eur J Clin Nutr* 1995;49:1-10.  
50 17  
51  
52  
53  
54 18 44. Wright F, Boyle S, Baxter K, *et al.* Understanding the relationship between weight loss,  
55 emotional well-being and health-related quality of life in patients attending a specialist  
56 19  
57 obesity weight management service. *J Health Psychol* 2013;18:574-86.  
58 20  
59  
60

- 1  
2  
3 1 45. Somerville R, McKenzie K, Eslami S, *et al*. Poor mental health in severely obese patients  
4 is not explained by the presence of comorbidities. *Clin Obes* 2014;5:12-21.  
5  
6 2  
7  
8  
9  
10 3 46. Madigan CD, Daley AJ, Lewis AL, *et al*. Which weight-loss programmes are as effective  
11 as Weight Watchers®? *Brit J Gen Pract* 2014;64(620):e128-e136.  
12 4  
13  
14  
15  
16 5 47. Curtis S, Oven K, Wistow J, *et al*. Adaptation to extreme weather events in complex  
17 health and social care systems: The example of older people's services in England.  
18 6  
19 7  
20 7  
21 *Environ Plann C: Politics and Space* 2018;36:67-91.  
22  
23  
24  
25 8 48. Milat AJ, King L, Newson R, *et al*. Increasing the scale and adoption of population health  
26 interventions: experiences and perspectives of policy makers, practitioners, and  
27 9  
28 10  
29 researchers. *Health Res Policy and Systems* 2014;12:18.  
30  
31  
32  
33  
34 11 49. Jebb S. *Dusting off Foresight's obesity report*. Foresight Blog UK: Government Office  
35 for Science, 2017. [https://foresightprojects.blog.gov.uk/2017/10/04/dusting-off-](https://foresightprojects.blog.gov.uk/2017/10/04/dusting-off-foresights-obesity-report/)  
36 12  
37 13  
38 foresights-obesity-report/. (Accessed 01 Feb 2019)  
39  
40  
41  
42  
43 14 50. Wolfenden L, Goldman S, Stacey FG *et al*. Strategies to improve the implementation of  
44 workplace-based policies or practices targeting tobacco, alcohol, diet, physical activity  
45 15  
46 16  
47 and obesity. *Cochrane Database of Syst Rev* 2018;11:CD012439.  
48  
49  
50  
51  
52 17  
53  
54 18  
55  
56 19  
57  
58 20  
59  
60 21



**SUPPLEMENTARY FILE 1. Momenta session content**

| <b>Week</b>                    | <b>Key topic</b>                                                                                                                                                          | <b>Week</b>    | <b>Key topic</b>                                                                                                                            |
|--------------------------------|---------------------------------------------------------------------------------------------------------------------------------------------------------------------------|----------------|---------------------------------------------------------------------------------------------------------------------------------------------|
| <b>Getting started session</b> | Motivation for weight loss<br>Weight loss goals<br>Differences from other weight management programmes<br>Monitoring                                                      |                |                                                                                                                                             |
| <b>Week 1</b>                  | <b>Snacking</b><br>Fatty, sugary snacks<br>Calories from snacking<br>Healthy snack choices<br>Healthy eating patterns                                                     | <b>Week 7</b>  | <b>Fats</b><br>Reducing fat<br>Different types of fat<br>Lower-fat cooking techniques<br>Hidden fats                                        |
| <b>Week 2</b>                  | <b>Heart rate</b><br>Cardiovascular exercise and health<br>Cardiovascular exercise and weight management<br>Recommended amounts of CV activity<br>Heart rate and exercise | <b>Week 8</b>  | <b>Internal triggers</b><br>Introduction to internal triggers<br>Identifying internal triggers<br>Managing internal triggers                |
| <b>Week 3</b>                  | <b>Food as fuel</b><br>A balanced diet and health<br>Planning meals<br>Fibre                                                                                              | <b>Week 9</b>  | <b>Active lifestyles</b><br>Physical activity and health<br>Physical activity and weight management<br>Different types of physical activity |
| <b>Week 4</b>                  | <b>External triggers</b><br>Introduction to external triggers<br>External triggers and over-eating<br>Managing triggers                                                   | <b>Week 10</b> | <b>Meals</b><br>Positive meal environment<br>Shopping<br>Food labels                                                                        |
| <b>Week 5</b>                  | <b>Strength</b><br>Resistance activity and health<br>Resistance activity and weight management                                                                            | <b>Week 11</b> | <b>Sugars</b><br>Sugary foods and drinks and weight loss<br>Alcohol<br>Added sugars<br>Sugary drinks and appetite regulation                |
| <b>Week 6</b>                  | <b>Breakfast</b><br>Eating breakfast<br>Retraining appetite<br>Barriers to eating breakfast<br>Developing new breakfast habits<br>Beyond marketing                        | <b>Week 12</b> | <b>Eating out</b><br>Challenges when eating away from home<br>Management and coping strategies<br>Moving forwards                           |

**SUPPLEMENTARY FILE 2.****Healthcare professionals' semi-structured interview guide**

*Semi Structured Interview Set the interviewee at ease; explain purpose of the interview; offer a better understanding of what the referral process requires to aid tier 2 weight management to be delivered in Northumberland; explanation about how the interview will be recorded; reaffirmation of consent; and how the information will be analysed and stored; rules of confidentiality / anonymity etc.*

**Questions:**

1. Thinking about raising the weight issue, tell me about your experience of discussing weight with patients.

*Prompts*

- *How does it feel to raise weight as an issue?*
- *Are patients open to discussing weight problems?*
- *Do you find a difference between genders when discussing weight?*
- *What helps you, such as the NHS Health Check Programme, to raise the issue of weight?*
- *What else would help to raise the issue or weight in appointments?*

2. Greater retention is often achieved when patients are ready to change, tell me how you work with / assess patient's readiness to change.

*Prompts*

- *Have you had training around the cycle of change?*
- *Do you use any specific tools or resources to assess the patient?*
- *What would help you to assess the patient's readiness to change?*

- 1  
2  
3  
4  
5  
6  
7  
8  
9  
10  
11  
12  
13  
14  
15  
16  
17  
18  
19  
20  
21  
22  
23  
24
3. Thinking the information and resources available to you during the referral, do you feel you had enough information and resources to encourage patient take up of the programme?

25  
26  
27  
28  
29

*Prompts*

- 30  
31  
32  
33  
34  
35  
36  
37  
38  
39  
40  
41  
42  
43  
44  
45  
46  
47
- *Did you have enough background information?*
  - *Were the referral forms suitable / capture all the information required?*
  - *Were the patient leaflets / resources suitable?*
  - *Were there questions or issues raised that couldn't be answered?*
  - *Was the process easy to use?*
  - *What else could help you to make referrals to weight management programmes?*

- 48  
49  
50  
51  
52  
53  
54  
55  
56  
57  
58  
59  
60
4. Thinking about after you referred the patient, what happened next? (excluded after pilot)

*Prompts*

- *Did you get feedback from the weight management programme on the progress of your patient?*
- *Did your patients achieve weight loss?*
- *Did your patient come back and talk about their experience?*

5. What things are most likely to prevent you from making the referral a weight management programme, either commercial or Public Health funded?

*Prompts*

- *Are there barriers that you perceive, such as cost to the patient?*
- *Are you concerned with raising the weight issue?*
- *Is it a time factor if the patient has an appointment for anything other than a weight issue?*
- *What would help you to overcome the barriers that prevent you from making the referral?*

- 1  
2  
3  
4  
5  
6  
7
6. Is there anything else that you would like to tell me about your expectations and experiences of the weight management programme?

8  
9

## Focus Group Topic Guide

10  
11  
12  
13  
14  
15  
16  
17  
18  
19  
20  
21  
22  
23  
24  
25  
26  
27  
28

*Set group at ease; explain purpose of the focus group; offer a better understanding of what works for people in terms of tier 2 weight management and what doesn't, aiding development of an effective programme for Northumberland residents; explanation about how the focus group will be recorded; reaffirmation of consent; and how the information will be analysed and stored; rules of confidentiality / anonymity etc.*

- 29  
30  
31
1. Tell me a bit about what sort of weight management activity you have taken part in, in the past.

32  
33

*Prompts*

- 34  
35  
36  
37  
38  
39  
40  
41  
42  
43
- *What influence have others had on your weight management?*
  - *Do you have any particular likes/dislikes of physical activity/managing weight/nutrition*
  - *Has there been anything else that has influenced your management of weight?*

- 44  
45  
46  
47  
48
2. So thinking about the weight management programme you have undertaken, how did you find out about it?

49  
50

*Prompts*

- 51  
52  
53  
54  
55  
56  
57  
58  
59  
60
- *Who / what motivated you to attend?*
  - *What made you decide that this is the right time to look at managing your weight?*
  - *Did the time of year make a difference?*

1  
2  
3 3. Thinking about your experience of when you were referred to the weight management programme,  
4  
5 how did you find the process?  
6

7  
8  
9  
10  
11  
12  
13  
14  
15  
16  
17  
18  
19  
20  
21  
22  
23  
24  
25  
26  
27  
28  
29  
30  
31  
32  
33  
34  
35  
36  
37  
38  
39  
40  
41  
42  
43  
44  
45  
46  
47  
48  
49  
50  
51  
52  
53  
54  
55  
56  
57  
58  
59  
60

*Prompts*

- *What type of health professional referred you? (GP / Practice Nurse)*
- *Did you specifically attend Primary Care to discuss your weight?*
- *How was weight raised?*
- *What did the referrer explain to you about the programme? Did you get enough information?*
- *How long was it from your referral from Primary Care to the first assessment in the weight management programme; was this what you expected? Were you still motivated?*

4. How did you feel about being referred?

- *Prompts*
- *How confident did you feel about taking part in the programme?*
- *Was there anything that you were particularly looking forward to?*
- *Was there anything that you were worried about?*

5. What did you hope to achieve by taking part in the weight management programme?

*Prompts*

- *What were your expectations when you start attending the scheme?*
- *Have there been changes to your health that you expected happen as a result of participation?*
- *How quickly did you expect to see these changes? And did this happen?*

6. Thinking about after you were referred, what happened next?

*Prompts*

- 1
- 2
- 3
- 4
- 5
- 6
- 7
- 8
- 9
- *How long after referral did it take to be contacted by the Active Northumberland?*
  - *What information did you receive prior to the initial consultation?*
  - *How comfortable did you feel coming to the initial consultation?*

10

11

12

13

14

15

16

17

18

19

20

21

22

23

24

25

26

27

28

29

30

31

32

33

34

35

36

37

38

39

40

41

42

43

44

45

46

47

48

49

50

51

52

53

54

55

56

57

58

59

60

7. What influenced you most to attend the weight management programme?

*Prompts*

- *What did you expect from the staff?*
- *How important to you were changes in health or weight?*
- *Why were the influences raised important?*

8. What things were most likely to prevent you from attending the programme?

*Prompts*

- *Tell me about any worries you might have had about health issues.*
- *Tell me about any other things, such as other commitments, that might have stopped you from attending*
- *Did any of these issues arise? How did you overcome these issues?*

9. Now that you have completed the programme, tell me how did you felt about undertaking the weight management programme?

*Prompts*

- *Did you achieve the health / weight outcomes you expected?*
- *Why do you think it worked or not for you?*
- *Do you feel you now have the tools to continue to make positive lifestyle choices?*
- *Is there something that will prevent you to continue to make positive lifestyle choices?*

10. Is there anything else that you would like to tell me about your expectations and experiences  
of the weight management programme?

For peer review only

**COREQ GUIDELINES REPORTING CHECKLIST: Prototyping for public health in a local context: a streamlined evaluation of a community-based weight management programme (Momenta), Northumberland, UK**

| No                                             | Item                                     | Guide questions/description                                                                                                                      | Information                                                                                                                                                                                                                                          | Reported in manuscript (Section, page no.)   |
|------------------------------------------------|------------------------------------------|--------------------------------------------------------------------------------------------------------------------------------------------------|------------------------------------------------------------------------------------------------------------------------------------------------------------------------------------------------------------------------------------------------------|----------------------------------------------|
| <b>Domain 1: Research team and reflexivity</b> |                                          |                                                                                                                                                  |                                                                                                                                                                                                                                                      |                                              |
| Personal Characteristics                       |                                          |                                                                                                                                                  |                                                                                                                                                                                                                                                      |                                              |
| 1                                              | Interviewer/facilitator:                 | Which author/s conducted the interview or focus group?                                                                                           | LN                                                                                                                                                                                                                                                   | Qualitative evaluation component, page 10    |
| 2                                              | Credentials                              | What were the researcher's credentials?                                                                                                          | LN: part of her Public Health Masters degree                                                                                                                                                                                                         | Qualitative evaluation component, page 10    |
| 3                                              | Occupation                               | What was their occupation at the time of the study?                                                                                              | LN: Masters student and employed as a member of the Northumberland public health team at the time of the evaluation.                                                                                                                                 | Qualitative evaluation component, page 10    |
| 4                                              | Gender                                   | Was the researcher male or female?                                                                                                               | Female (referred to as her)                                                                                                                                                                                                                          | Qualitative evaluation component, page 10    |
| 5                                              | Experience and training                  | What experience or training did the researcher have?                                                                                             | LN: Masters in Public Health (which contained qualitative methods training), mentored by TF, an experienced qualitative researcher.                                                                                                                  | Qualitative evaluation component, page 10    |
| Relationship with participants                 |                                          |                                                                                                                                                  |                                                                                                                                                                                                                                                      |                                              |
| 6                                              | Relationship established                 | Was a relationship established prior to study commencement?                                                                                      | No. Practice managers from all six referring surgeries were sent an invitation for staff to take part.                                                                                                                                               | Qualitative evaluation component, page 10    |
| 7                                              | Participant knowledge of the interviewer | What did the participants know about the researcher? <i>e.g. personal goals, reasons for doing the research</i>                                  | LN informed HCP participants about her employment status and that the study aimed to understand implementation issues.<br><br>Programme participants were invited to participate in a series of focus groups at programme-end to explore experiences | Qualitative evaluation component, page 10-11 |
| 8                                              | Interviewer characteristics              | What characteristics were reported about the interviewer/facilitator? <i>e.g. Bias, assumptions, reasons and interests in the research topic</i> | Not discussed                                                                                                                                                                                                                                        | N/A                                          |



| <b>Domain 1: Study design</b> |                                       |                                                                                                                                                                 |                                                                                                                                                                                                                                                                         |                                                                                          |
|-------------------------------|---------------------------------------|-----------------------------------------------------------------------------------------------------------------------------------------------------------------|-------------------------------------------------------------------------------------------------------------------------------------------------------------------------------------------------------------------------------------------------------------------------|------------------------------------------------------------------------------------------|
| Theoretical framework         |                                       |                                                                                                                                                                 |                                                                                                                                                                                                                                                                         |                                                                                          |
| 9                             | Methodological orientation and Theory | What methodological orientation was stated to underpin the study? <i>e.g. grounded theory, discourse analysis, ethnography, phenomenology, content analysis</i> | Qualitative data were audio-recorded and transcribed by LN using a thematic process                                                                                                                                                                                     | Data analysis, page 12                                                                   |
| Participant selection         |                                       |                                                                                                                                                                 |                                                                                                                                                                                                                                                                         |                                                                                          |
| 10                            | Sampling                              | How were participants selected? <i>e.g. purposive, convenience, consecutive, snowball</i>                                                                       | All HCPs involved were invited: Practice managers from all six referring surgeries were sent an invitation for staff to take part<br><br>Programme participants: for the first wave of referrals, all (n = 39) were invited to participate in a series of focus groups. | Qualitative evaluation component, page 10-11                                             |
| 11                            | Method of approach                    | How were participants approached? <i>e.g. face-to-face, telephone, mail, email</i>                                                                              | HCPs: by email<br><br>Programme participants: written information handed out during the first session                                                                                                                                                                   | Qualitative evaluation component, page 10-11                                             |
| 12                            | Sample size                           | How many participants were in the study?                                                                                                                        | 5 HCPs<br>13 Intervention participants                                                                                                                                                                                                                                  | Results, page 18<br>Results, page 18                                                     |
| 13                            | Non-participation                     | How many people refused to participate or dropped out? Reasons?                                                                                                 | HCPs: 84 invited, 5 participated.<br><br>Programme participants: 39 invited, 13 participated<br>Reasons for refusal not documented                                                                                                                                      | Qualitative evaluation component, page 10-11 and<br>Results, page 15<br>Results, page 18 |
| Setting                       |                                       |                                                                                                                                                                 |                                                                                                                                                                                                                                                                         |                                                                                          |
| 14                            | Setting of data collection            | Where was the data collected? <i>e.g. home, clinic, workplace</i>                                                                                               | HCPs: in referring surgeries<br><br>Programme participants: in the leisure centres                                                                                                                                                                                      | Results, page 15<br><br>Results, page 18                                                 |
| 15                            | Presence of non-participants          | Was anyone else present besides the participants and researchers?                                                                                               | Not stated                                                                                                                                                                                                                                                              | N/A                                                                                      |
| 16                            | Description of sample                 | What are the important characteristics of the                                                                                                                   | HCPs: role reported                                                                                                                                                                                                                                                     | Results, page 15<br>Results, page 18                                                     |

|    |                                        |                                                                               |                                                                                                                                                |                                                                                            |
|----|----------------------------------------|-------------------------------------------------------------------------------|------------------------------------------------------------------------------------------------------------------------------------------------|--------------------------------------------------------------------------------------------|
|    |                                        | sample? <i>e.g. demographic data, date</i>                                    | Programme participants: programme group and weight loss status reported<br><br>Date range for interviews reported                              | Qualitative evaluation component, page 10                                                  |
|    | Data collection                        |                                                                               |                                                                                                                                                |                                                                                            |
| 17 | Interview guide                        | Were questions, prompts, guides provided by the authors? Was it pilot tested? | Semi-structured interview guide used. Pilot tested.<br><br>Guides provided as supplementary file                                               | Qualitative evaluation component, page 10-11<br><br>Supplementary file 2                   |
| 18 | Repeat interviews                      | Were repeat interviews carried out? If yes, how many?                         | No not applicable to study design                                                                                                              | N/A                                                                                        |
| 19 | Audio/visual recording                 | Did the research use audio or visual recording to collect the data?           | Yes, the interviews were audio recorded                                                                                                        | Data analysis, page 12                                                                     |
| 20 | Field notes                            | Were field notes made during and/or after the interview or focus group?       | Notes taken from focus groups helped to contextualise developing themes                                                                        | Data analysis, page 12                                                                     |
| 21 | Duration                               | What was the duration of the interviews or focus groups?                      | HCPs average length reported: 26 minutes<br><br>Programme participants: range reported: 26-44 minutes                                          | Qualitative evaluation component, page 10<br><br>Qualitative evaluation component, page 11 |
| 22 | Data saturation                        | Was data saturation discussed?                                                | No                                                                                                                                             | N/A                                                                                        |
| 23 | Transcripts returned                   | Were transcripts returned to participants for comment and/or correction?      | No                                                                                                                                             | N/A                                                                                        |
|    | <b>Domain 3: analysis and findings</b> |                                                                               |                                                                                                                                                |                                                                                            |
|    | Data analysis                          |                                                                               |                                                                                                                                                |                                                                                            |
| 24 | Number of data coders                  | How many data coders coded the data?                                          | N=2 (LN and TF)                                                                                                                                | Data analysis, page 12                                                                     |
| 25 | Description of the coding tree         | Did authors provide a description of the coding tree?                         | Yes key themes described at beginning of HCP qualitative results section and at beginning of programme participant qualitative results section | Results, page 15<br><br>Results, page 18                                                   |
| 26 | Derivation of themes                   | Were themes identified in advance or derived from the data?                   | Identified from data                                                                                                                           | Data analysis, page 12                                                                     |

|           |                              |                                                                                                                                   |                                                                                             |                     |
|-----------|------------------------------|-----------------------------------------------------------------------------------------------------------------------------------|---------------------------------------------------------------------------------------------|---------------------|
| 27        | Software                     | What software, if applicable, was used to manage the data?                                                                        | Not stated                                                                                  | N/A                 |
| 28        | Participant checking         | Did participants provide feedback on the findings?                                                                                | No                                                                                          | N/A                 |
| Reporting |                              |                                                                                                                                   |                                                                                             |                     |
| 29        | Quotations presented         | Were participant quotations presented to illustrate the themes / findings? Was each quotation identified? e.g. participant number | Yes, participants identified using a participant label                                      | Results, page 15-19 |
| 30        | Data and findings consistent | Was there consistency between the data presented and the findings?                                                                | Themes were illustrated by participant quotations                                           | Results, page 15-19 |
| 31        | Clarity of major themes      | Were major themes clearly presented in the findings?                                                                              | Themes identified and presented under sub headings for both HCPs and programme participants | Results, page 15-19 |
| 32        | Clarity of minor themes      | Is there a description of diverse cases or discussion of minor themes?                                                            | For HCPs minor themes highlighted under additional barriers to engagement                   | Results, page 17    |

# BMJ Open

## Prototyping for public health in a local context: a streamlined evaluation of a community-based weight management programme (Momenta), Northumberland, UK

|                                 |                                                                                                                                                                                                                                                                                                                                                                                                                                                                                                                                                                                                                                                                                                                                                                                                                                                                                      |
|---------------------------------|--------------------------------------------------------------------------------------------------------------------------------------------------------------------------------------------------------------------------------------------------------------------------------------------------------------------------------------------------------------------------------------------------------------------------------------------------------------------------------------------------------------------------------------------------------------------------------------------------------------------------------------------------------------------------------------------------------------------------------------------------------------------------------------------------------------------------------------------------------------------------------------|
| Journal:                        | <i>BMJ Open</i>                                                                                                                                                                                                                                                                                                                                                                                                                                                                                                                                                                                                                                                                                                                                                                                                                                                                      |
| Manuscript ID                   | bmjopen-2019-029718.R3                                                                                                                                                                                                                                                                                                                                                                                                                                                                                                                                                                                                                                                                                                                                                                                                                                                               |
| Article Type:                   | Original research                                                                                                                                                                                                                                                                                                                                                                                                                                                                                                                                                                                                                                                                                                                                                                                                                                                                    |
| Date Submitted by the Author:   | 05-Sep-2019                                                                                                                                                                                                                                                                                                                                                                                                                                                                                                                                                                                                                                                                                                                                                                                                                                                                          |
| Complete List of Authors:       | Dodd-Reynolds, Caroline; Durham University, Department of Sport and Exercise Sciences; Durham University, Wolfson Research Institute for Health and Wellbeing Physical Activity Special Interest Group<br>Nevens, Lisa; Northumbria Healthcare NHS Foundation Trust Community Services Business Unit<br>Oliver, Emily; Durham University, Wolfson Research Institute for Health and Wellbeing Physical Activity Special Interest Group; Durham University, Department of Sport and Exercise Sciences,<br>Finch, Tracy; Northumbria University, Nursing, Midwifery and Health<br>Lake, Amelia; Department of Science, School of Science, Engineering and Design, Teesside University<br>Hanson, Coral; Edinburgh Napier University, School of Health and Social Care; Durham University, Wolfson Research Institute for Health and Wellbeing Physical Activity Special Interest Group |
| <b>Primary Subject Heading</b>: | Public health                                                                                                                                                                                                                                                                                                                                                                                                                                                                                                                                                                                                                                                                                                                                                                                                                                                                        |
| Secondary Subject Heading:      | Nutrition and metabolism                                                                                                                                                                                                                                                                                                                                                                                                                                                                                                                                                                                                                                                                                                                                                                                                                                                             |
| Keywords:                       | public health evaluation, prototyping, implementation, community weight management, NUTRITION & DIETETICS, exercise referral                                                                                                                                                                                                                                                                                                                                                                                                                                                                                                                                                                                                                                                                                                                                                         |
|                                 |                                                                                                                                                                                                                                                                                                                                                                                                                                                                                                                                                                                                                                                                                                                                                                                                                                                                                      |

SCHOLARONE™  
Manuscripts

1  
2  
3 1 Prototyping for public health in a local context: a streamlined evaluation of a community-  
4 based weight management programme (Momenta), Northumberland, UK  
5  
6 2  
7  
8 3  
9  
10 4 Caroline J Dodd-Reynolds<sup>1,2</sup> (corresponding author\*), Lisa Nevens<sup>3</sup>, Emily J Oliver<sup>1,2</sup>, Tracy  
11 Finch<sup>4</sup>, Amelia A Lake<sup>5,6</sup> Coral L Hanson<sup>7</sup>  
12  
13 5  
14  
15 6  
16  
17  
18 7  
19  
20 8  
21  
22 9  
23  
24 10  
25  
26  
27 11  
28  
29 12  
30  
31 13  
32  
33  
34 14  
35  
36 15  
37  
38 16  
39  
40 17  
41  
42  
43 18  
44  
45  
46 19  
47  
48  
49 20  
50 21  
51  
52 22  
53  
54 23  
55  
56 24  
57  
58  
59  
60 25

<sup>1</sup>Department of Sport and Exercise Sciences, Durham University, Durham, DH1 3HN, UK\*.

Email: caroline.dodd-reynolds@durham.ac.uk Tel: +44(0)191 3342000

<sup>2</sup>Wolfson Research Institute for Health and Wellbeing Physical Activity Special Interest Group, Durham University, Durham, UK.

<sup>3</sup>Northumbria Healthcare NHS Foundation Trust, Northumberland, UK.

<sup>4</sup>Department of Nursing, Midwifery and Health, Northumbria University, Newcastle upon Tyne, UK

<sup>5</sup>Department of Science, School of Science, Engineering and Design, Teesside University, Teesside, UK

<sup>6</sup>Fuse – UKCRC Centre for Translational Research in Public Health, UK

<sup>7</sup>School of Health and Social Care, Edinburgh Napier University, Edinburgh, UK

**Word count:** 4214

**Keywords:** Public health evaluation, prototyping, implementation, community weight management, diet, exercise referral

## 1 ABSTRACT

2 **Objectives** Stakeholder co-production in design of public health programmes may reduce the  
3 ‘implementation gap’ but can be time-consuming and costly. Prototyping, iterative refining  
4 relevant to delivery context, offers a potential solution. This evaluation explored  
5 implementation and lessons learned for a 12-week referral-based weight-management  
6 programme, ‘Momenta’, along with feasibility of an iterative prototyping evaluation  
7 framework.

8 **Design** Mixed methods evaluation: qualitative implementation exploration with referrers and  
9 service users; preliminary analysis of anonymised quantitative service data (12 and 52  
10 weeks).

11 **Setting** Two leisure centres in Northumberland, northeast England.

12 **Participants** Individual interviews with referring professionals (n=5) and focus groups with  
13 service users (n=13). Individuals (n=182) referred by healthcare professionals (quantitative  
14 data).

15 **Interventions** Three 12-week programme iterations: Momenta (n=59), Momenta-Fitness  
16 membership (Momenta-Fitness (n=58), and Fitness membership only (n=65).

17 **Primary and secondary outcome measures** Primary outcome: Qualitative themes  
18 developed through stakeholder-engagement. Secondary outcomes included preliminary  
19 exploration of recruitment, uptake, retention, and changes in weight, BMI waist  
20 circumference and psychological wellbeing.

21 **Results** Service users reported positive experiences of Momenta. Implementation gaps were  
22 revealed around the referral process and practitioner knowledge. Prototyping enabled

1  
2  
3 1 iterative refinements such as broadening inclusion criteria. Uptake and 12-week retention  
4  
5 2 were higher for Momenta (84.7%, 45.8%) and Momenta-Fitness (93.1%, 60.3%) versus  
6  
7 3 Fitness-only (75.4%, 24.6%). Exploration of other preliminary outcomes (completers only)  
8  
9 4 suggested potential for within-group weight loss and increased psychological wellbeing for  
10  
11 5 Momenta and Momenta-Fitness at 12 weeks. 52-week follow-up data were limited (32%,  
12  
13 6 33%, and 6% retention for those who started Momenta, Momenta-Fitness and Fitness  
14  
15 7 respectively) but suggested potential weight loss maintenance in Momenta-Fitness.  
16  
17  
18  
19  
20  
21  
22  
23  
24  
25  
26  
27  
28  
29  
30  
31  
32  
33  
34  
35  
36  
37  
38  
39  
40  
41  
42  
43  
44  
45  
46  
47  
48  
49  
50  
51  
52  
53  
54  
55  
56  
57  
58  
59  
60

9 **Conclusions** Identification of issues within the referral process enabled real-time iterative  
10 refinement, whilst lessons learned may be of value for local implementation of ‘off-the-shelf’  
11 weight management packages more generally. Our preliminary data for completers suggest  
12 Momenta may have potential for weight loss, particularly when offered with a fitness  
13 membership.

1  
2  
3 1  
4  
5  
6 2  
7  
8  
9 3  
10  
11  
12 4  
13  
14  
15  
16 5  
17  
18  
19 6  
20  
21  
22 7  
23  
24 8  
25  
26 9  
27  
28  
29 10  
30  
31 11  
32  
33  
34 12  
35  
36 13  
37  
38 14  
39  
40  
41 15  
42  
43 16  
44  
45 17  
46  
47 18  
48  
49 19  
50  
51 20  
52  
53 21  
54  
55 22  
56  
57 23  
58  
59  
60

### ARTICLE SUMMARY

#### Strengths and limitations of this study

- This study advances understanding about whether prototyping is a time-efficient and cost-effective approach to design and implementation of public health programmes.
- This mixed methods evaluation provides insight into the implementation of an ‘off-the-shelf’ weight management programme, in a local context.
- Embedding stakeholders’ views throughout the entire evaluation process allowed for ongoing, iterative refinement.
- A limitation to the quantitative component is the small sample size and rate of missing data at 1 year; findings should thus be interpreted with caution.
- Qualitative interviews and focus groups can only provide information about what participants recall about their experiences, meaning that there is a potential for recall bias.



## 1 INTRODUCTION

2  
3  
4  
5  
6  
7  
8 Failure to implement effective public health interventions when programmes are scaled up or  
9  
10 transferred across contexts is widely reported.<sup>1</sup> Proposed approaches attempting to address  
11  
12 this implementation gap include; effectiveness-implementation hybrid designs,<sup>2</sup> linking  
13  
14 action to theory and models based on theory,<sup>3</sup> and application of the replicating effective  
15  
16 programmes framework.<sup>4</sup> Common to all is advocacy of a developmental process reflecting  
17  
18 on existing knowledge about the target population and planned programme prior to service  
19  
20 delivery. Furthermore, engagement of service users is encouraged at all stages of intervention  
21  
22 and evaluation design in MRC guidance.<sup>5</sup> Although this increases the likelihood of services  
23  
24 meeting all stakeholder needs, concerns about the practical, personal, and professional costs  
25  
26 of co-production have been raised.<sup>6</sup> Resulting well-designed services will be tailored to a  
27  
28 problem that may have changed during the time spent developing the intervention.  
29  
30  
31 Additionally, public access may be delayed. Resource-pressured public health services must  
32  
33 therefore consider pragmatic alternatives to service design and implementation. In this paper,  
34  
35 we explore a novel evaluation approach to these implementation challenges, focusing on a  
36  
37 problem high on the public health agenda: obesity and overweight.  
38  
39  
40  
41  
42  
43  
44

45 Targeting elevated weight status is a public health priority, obesity being a recognised risk  
46  
47 factor for many negative physical and psychological health outcomes.<sup>7-11</sup> In England for  
48  
49 example, obesity and overweight are associated with 30,000 deaths and an estimated National  
50  
51 Health Service cost of £6.1 billion per annum.<sup>12</sup> Globally, countries with higher income  
52  
53 inequalities tend to have higher rates of obesity.<sup>13</sup> Excess weight is also associated with  
54  
55 widening social and economic deprivation,<sup>14</sup> with calls to improve the effectiveness of  
56  
57 behaviour change interventions for low-income groups.<sup>15</sup> There is a clear need for effective  
58  
59  
60

1 public health programmes that can be refined according to local need, especially in areas with  
2 substantial deprivation. This evaluation focuses on Northumberland, in northeast England.  
3 Northumberland is one of the lowest ranked counties in England by Gross Value Added per  
4 capita (£16,140).<sup>16</sup> Unemployment is higher (5.5% versus 4.8%) than the England average<sup>17</sup>  
5 and Northumberland public health spend per person is £53, compared to a £59 national  
6 average.<sup>18</sup> 63.8% of adults are classified as having excess weight, higher than the national  
7 average of 61.3%.<sup>19</sup>  
8  
9 The need for innovation within public health has been postulated, shifting away from the  
10 traditional linear pre-conceived and evidence-based model.<sup>20</sup> For example, Parry and  
11 colleagues<sup>21</sup> call for research to explore not only how a programme works, but also the  
12 context and requirements for any adaptations. One such approach is prototyping<sup>22</sup> where  
13 projects test innovations iteratively, with ongoing refinement considering the interplay  
14 between a programme and its delivery context. Evaluation and public health teams are able to  
15 communicate at all stages of the programme, with evaluation recommendations incorporated  
16 via a rapid-cycle basis.<sup>21</sup> A small number of studies to date, for example in drug prevention<sup>22</sup>  
17 and web-based support of long-term weight loss<sup>23</sup> have demonstrated efficiencies when  
18 including elements of prototyping within programme development (including time,  
19 adaptation to context and cost). Such an approach seems particularly well-suited to weight  
20 management, where there are many examples of ‘good’ practice, or effectiveness, but no  
21 clear consensus on ‘best’ practice at service-delivery level. There is also limited  
22 understanding of how ‘scaling up’ and adapting of programmes or interventions to local  
23 contexts may impact on effectiveness. This evaluation has particular value therefore in testing  
24 a prototyping approach for a weight management programme, delivered and adapted ‘in real-  
25 time’, at local authority level.

1  
2  
3 1 The aim was to explore implementation of an ‘off-the-shelf’ weight management programme,  
4  
5 2 Momenta<sup>24</sup>, in a challenging context. Specific objectives were to explore local  
6  
7 3 implementation, consider feasibility of the iterative prototyping evaluation framework and  
8  
9 4 explore preliminary outcome domains including recruitment, retention, weight change and  
10  
11 5 wellbeing.  
12  
13  
14  
15  
16

## 17 7 **METHODS**

### 18 8 19 20 21 9 **The prototyping process: local context and evaluation design**

22  
23  
24 10  
25  
26 11 A local authority health needs assessment identified a gap in provision for a lifestyle-based  
27  
28 12 weight management referral programme within Northumberland. Adults with overweight or  
29  
30 13 obesity were at the time eligible for referral to the Northumberland exercise referral scheme  
31  
32 14 (ERS), however previous evaluation demonstrated modest weight loss<sup>25</sup> and body mass index  
33  
34 15 (BMI) >30 kg/m<sup>2</sup> was negatively associated with adherence.<sup>26</sup> Thus ‘Momenta’ was  
35  
36 16 commissioned for local adaptation and delivery. The Momenta programme incorporates  
37  
38 17 evidence-based behaviour change techniques and is designed to be delivered by fitness  
39  
40 18 professionals in a leisure environment.<sup>24</sup> Developed by the MEND childhood weight  
41  
42 19 management programme<sup>27</sup> designers, this 12-week programme aims to facilitate weight loss  
43  
44 20 by engaging participants in 12 key behaviours broadly encompassing psychology, diet and  
45  
46 21 physical activity (supplementary file 1). Briefly, Momenta sessions explored topics using  
47  
48 22 interactive and experiential learning techniques including brainstorming, group activities and  
49  
50 23 discussion, quizzes and games. At the end of each session, participants set goals focusing on  
51  
52 24 one of the 12 key behaviours. At the beginning of each session, the group discussed the  
53  
54  
55  
56  
57  
58  
59  
60

1 previous weeks' goals by exchanging stories and brainstorming challenges. All interventions  
2 were free to service users.

3  
4  
5  
6  
7  
8  
9  
10 The local Leisure Trust was commissioned to deliver a pilot Momenta programme.  
11  
12 Commissioners and providers had ideas about alternative delivery options and due to an  
13 established academic relationship, asked the study team for advice about robust evaluation  
14 that would allow for feedback in real time and at the end of the pilot. Stakeholder meetings  
15 were held with Public Health staff (n=2), Leisure Trust managers (n=3), delivery staff (n=2)  
16 and Momenta programme developers (n=2). As part of the prototyping process, members of  
17 the evaluation team (CDR, EO) provided guidance on evaluation design and light touch  
18 advice about tools to explore preliminary effectiveness. The evaluation was thus co-  
19 produced to ensure a robust framework, whilst meeting strategic local needs. For example,  
20 commissioners were concerned about meeting recruitment targets for an existing specialist  
21 weight management service used mainly for pre-bariatric patients and Momenta was initially  
22 commissioned for patients with BMI 25.0-29.9 kg/m<sup>2</sup>, although this was later amended.  
23 Furthermore, commissioners were keen to consider accessibility of provision and wished to  
24 explore offering free gym, swimming and fitness class membership. The evaluation was  
25 designed to accommodate this.

26  
27  
28  
29  
30  
31  
32  
33  
34  
35  
36  
37  
38  
39  
40  
41  
42  
43  
44  
45  
46  
47 The programme was ultimately delivered at two leisure sites situated within the 20% and  
48 50% most deprived neighbourhoods in the country. Six General Practice (GP) surgeries,  
49 identified as the best referrers to the existing ERS, were asked to refer suitable patients to  
50 Momenta. The programme manager and the public health improvement manager (LN)  
51 attended practice meetings to articulate referral criteria and disseminate advertising materials.  
52  
53  
54  
55  
56  
57  
58  
59  
60

1  
2  
3 1 Attendance varied from two to all practice staff, meaning that in some surgeries knowledge  
4  
5 2 of the programme was reliant on dissemination by those who attended.  
6  
7  
8 3

9  
10 4 A mixed methods evaluation was agreed between the evaluation team and commissioners.  
11  
12 5 Qualitative and quantitative components were conducted concurrently and had equal status.<sup>28</sup>  
13  
14 6 Prototyping allowed for iterative changes to be made to the implementation and delivery of the  
15  
16  
17 7 programme in real time and we reflect upon these in the results and discussion.  
18  
19 8

20  
21 9 Referrals by healthcare professionals (HCPs) were via a standardised form to the appropriate  
22  
23  
24 10 leisure site. Prior to programme commencement the Leisure Trust, in conjunction with the  
25  
26 11 Momenta programme designer and members of the evaluation team, held a training day for  
27  
28 12 delivery staff. Although staff were qualified to deliver Momenta, extra bespoke training  
29  
30  
31 13 (including role-play scenarios and problem-solving discussions) was delivered by the clinical  
32  
33 14 psychologist who designed Momenta. The evaluation team (CDR, CH) trained delivery staff  
34  
35 15 in international standard anthropometric techniques<sup>29</sup> and familiarised them with other  
36  
37  
38 16 evaluation measures.  
39  
40 17

41  
42 18 Programme providers allocated service users into one of three comparison groups:

- 43  
44 19 a) Combined Momenta plus fitness membership (Momenta-Fitness);  
45  
46  
47 20 b) Momenta;  
48  
49 21 c) Fitness membership (Fitness only).

50  
51 22 Participants were allocated into groups in order of receipt (the first referral form received was  
52  
53  
54 23 allocated to Momenta-Fitness, the second form to Momenta, the third form to fitness only  
55  
56 24 etc.). The provider then contacted participants by telephone to arrange attendance. If a  
57  
58 25 participant was unable to attend the allocated group, (e.g. due to inconvenient session times)  
59  
60

1 provider allocated them to a different group after discussion. Due to maximum recommended  
2 Momenta group size, referrals were split into delivery cohorts of 15, with groups rolling  
3 through March 2015 to April 2016.

4  
5 Implementation effectiveness for the referral process was explored through semi-structured  
6 interviews with referring HCPs (undertaken at referring surgeries) and focus groups with  
7 service users (in leisure centres). All were conducted by LN during March-July 2015, as part  
8 of her Public Health Master's degree (which contained qualitative methods training), mentored  
9 by TF, an experienced qualitative researcher. LN was employed as a member of the  
10 Northumberland public health team at the time of the evaluation. Questions are included in  
11 supplementary file 2. Data were audio-recorded. Results are reported using the Consolidated  
12 criteria for Reporting Qualitative research guidelines.<sup>30</sup>

13  
14 Practice managers from all six referring surgeries were sent an email invitation for staff to  
15 take part (n = 84), (General Practitioner = 53, Practice Nurse = 18, Health Care Assistant =  
16 13). Individual correspondence was sent to those agreeing. LN informed participants about  
17 her employment status and that the study aimed to understand implementation issues.  
18 Interviews aimed to explore HCPs' referral experiences; raising weight issues; assessing  
19 readiness to change; marketing and referral materials; and the referral process. Interview  
20 questions were pilot tested with public health colleagues to assess timing and ensure validity.  
21 One question (*Thinking about after you referred the patient, what happened next?*) was  
22 omitted after piloting as it was realised HCPs would not have had patient feedback at that  
23 point. Interviews lasted on average 26 minutes and were transcribed verbatim. Data were  
24 analysed following each interview, with developing themes considered to determine whether

1 questions required refinement. Initial themes generated from the first two interviews did not  
2  
3  
4  
5  
6  
7  
8  
9  
10  
11  
12  
13  
14  
15  
16  
17  
18  
19  
20  
21  
22  
23  
24  
25  
26  
27  
28  
29  
30  
31  
32  
33  
34  
35  
36  
37  
38  
39  
40  
41  
42  
43  
44  
45  
46  
47  
48  
49  
50  
51  
52  
53  
54  
55  
56  
57  
58  
59  
60

1 questions required refinement. Initial themes generated from the first two interviews did not  
2 change and thus questions remained constant, although prompts were added.

3  
4  
5  
6  
7  
8  
9  
10  
11  
12  
13  
14  
15  
16  
17  
18  
19  
20  
21  
22  
23  
24  
25  
26  
27  
28  
29  
30  
31  
32  
33  
34  
35  
36  
37  
38  
39  
40  
41  
42  
43  
44  
45  
46  
47  
48  
49  
50  
51  
52  
53  
54  
55  
56  
57  
58  
59  
60

4 During the initial assessment session for the first wave of referrals, all ( $n = 39$ ) were given a  
5 written invitation to participate in a series of focus groups at programme-end to explore  
6 experiences. Emphasis was placed on the referral process, initial expectations and  
7 experiences of participation; how weight issues were raised by HCPs; time from referral to  
8 initial assessment; and facilitators and barriers to taking part. Focus groups lasted between 26  
9 and 44 minutes.

10  
11 Preliminary outcome data were collected to provide an initial indication of programme  
12 success. These included anthropometric measurements to determine weight change. Well-  
13 being measures were of specific interest to commissioners. Sociodemographic information  
14 was also available as indicated.

15  
16 Age, gender and postcode (for index of multiple deprivation, IMD) were recorded by  
17 referring HCPs on the referral form. Employment status, level of education, cohort wave and  
18 programme group were recorded by leisure staff, who also measured weight and stature  
19 (without shoes or bulky clothing) and waist circumference at baseline and programme end.

20 Measures were taken in at least duplicate, using standardised tools in accordance with  
21 international standards<sup>29</sup> using SECA 761 scales, a Leicester portable stadiometer and  
22 anthropometry tape. Body mass index was calculated and classified according to WHO  
23 guidelines.<sup>31</sup> The Warwick-Edinburgh Mental Well-being Scale,<sup>32</sup> and the Hospital Anxiety  
24 and Depression Scale (HADS)<sup>33</sup> were administered at each time-point. Attendance at  
25 Momenta and leisure centre usage was monitored via swipe-card tracking. 52 weeks after

1 commencing the programme, service users were invited to attend a follow-up session, where  
2 leisure staff repeated physiological and psychological measures. Programme providers  
3 collected and collated quantitative data and provided an anonymised dataset to the evaluation  
4 team for analysis.

## 6 **Patient and public involvement**

7 Patients and the public were not involved in the choice of evaluation topic, assisting in the  
8 study design, advising on the project or in carrying out the evaluation.

## 10 **Data analyses**

12 Qualitative data were audio-recorded and transcribed by LN using a thematic process.<sup>34</sup> Data  
13 were organised according to concepts, key themes and developing categories. Data coding  
14 was discussed with TF, allowing comparison of data interpretation and subsequent coding  
15 refinement. Evolving key themes were refined through the analysis process and subsequent  
16 cross-sectional thematic labelling of data, thus generating deeper understanding. Where  
17 possible, key phrases or expressions identified from interviews and focus groups were  
18 retained within coding and thematic labelling. A public health colleague helped to verify  
19 interpretations of the data and appropriateness of codes applied. Once initial interviews were  
20 coded this framework was applied to remaining data. Notes taken during focus groups helped  
21 to contextualise when developing themes and included information about dynamics within  
22 groups, such as influence, disagreement, humour and peer exposure.

24 The anonymised quantitative dataset was analysed using PSAW Statistics V.22. Descriptive  
25 statistics were calculated for age, gender, IMD, employment status, initial BMI, leisure site,



1  
2  
3 1 level of education, and uptake and adherence. Distribution and normality of measures  
4  
5 2 (weight, BMI, waist circumference, psychological wellbeing and attendance) were assessed  
6  
7 3 using Shapiro Wilk tests and median and interquartile range (IQR) scores calculated for each  
8  
9 4 group at baseline and 12 weeks (attendance, 12 weeks only). Using complete cases, Kruskal-  
10  
11 5 Wallis H tests were used to explore preliminary between-group differences at baseline and at  
12  
13 6 12 weeks and Wilcoxon-signed rank tests explored preliminary repeated measures differences  
14  
15 7 between baseline and 12-week scores. Complete cases available at 52 weeks ( $n = 37$ ) were  
16  
17 8 considered similarly, but via separate analyses due to limited available data across  
18  
19 9 comparison groups.  
20  
21  
22  
23  
24  
25  
26  
27  
28  
29  
30  
31

## 32 11 **RESULTS**

33  
34 12  
35 13 Between December 2014 and March 2016, the programme received 182 referrals and was  
36  
37 14 delivered in four cohorts across leisure sites. Due to initial low levels of recruitment, the first  
38  
39 15 cohort did not start until March 2015. Referrals were mainly female (83%) and 30.6% lived  
40  
41 16 in the 20% most deprived areas (table 1).  
42  
43  
44  
45  
46  
47  
48  
49  
50  
51  
52  
53  
54  
55  
56  
57  
58  
59  
60

**Table 1. Demographic characteristics of referrals who started the programme (n=153)**

|                                                | Median | IQR      |          |
|------------------------------------------------|--------|----------|----------|
| <b>Age (years)</b>                             |        | 53       | 24       |
| <b>Gender</b>                                  |        | <b>n</b> | <b>%</b> |
| Male                                           |        | 25       | 16.3%    |
| Female                                         |        | 120      | 78.4%    |
| Not stated                                     |        | 8        | 5.2%     |
| <b>Initial BMI category (kg/m<sup>2</sup>)</b> |        |          |          |
| 25.0-29.9                                      |        | 40       | 26.1%    |
| 30.0-34.9                                      |        | 73       | 47.7%    |
| 35.0-39.9                                      |        | 27       | 17.6%    |
| ≥40.0                                          |        | 10       | 6.5%     |
| Not stated                                     |        | 3        | 2.0%     |
| <b>Leisure site</b>                            |        |          |          |
| Leisure site 1 (IMD quintile 2)                |        | 69       | 45.1%    |
| Leisure site 2 (IMD quintile 3)                |        | 83       | 54.2%    |
| Not stated                                     |        | 1        | 0.7%     |
| <b>Index of multiple deprivation</b>           |        |          |          |
| 20% most deprived                              |        | 42       | 27.5%    |
| 21-40%                                         |        | 33       | 21.6%    |
| 41-60%                                         |        | 17       | 11.1%    |
| 61-80%                                         |        | 20       | 13.1%    |
| 20% least deprived                             |        | 35       | 22.9%    |
| Not stated                                     |        | 6        | 3.9%     |
| <b>Employment status</b>                       |        |          |          |
| Employed full time                             |        | 36       | 23.5%    |
| Employed part time                             |        | 24       | 15.7%    |
| Retired                                        |        | 51       | 33.3%    |
| Claiming incapacity benefit                    |        | 5        | 3.3%     |
| Claiming job seekers allowance                 |        | 6        | 3.9%     |
| Not stated                                     |        | 14       | 9.2%     |
| <b>Level of education</b>                      |        |          |          |
| Primary                                        |        | 15       | 9.8%     |
| Secondary (O level/GCSE)                       |        | 35       | 22.9%    |
| Secondary (A level)                            |        | 26       | 17.0%    |
| Further education (HND)                        |        | 24       | 15.7%    |
| Bachelors or equivalent                        |        | 21       | 13.7%    |
| Masters or equivalent                          |        | 5        | 3.3%     |
| Not stated                                     |        | 27       | 17.6%    |

Age, gender and postcode (IMD calculated by the programme provider) recorded from the referral form.

Employment and level of education self-reported by participants during the first session. The provider did not follow up missing data.

BMI and leisure site recorded by the provider. Missing data not available for analysis and presumed to be data entry errors.

1  
2  
3 1  
4  
5  
6 2**Implementation effectiveness: reflections from referring healthcare professionals**7  
8 3  
9

4 Five face-to-face semi-structured interviews took place with HCPs across five referring  
5 surgeries: two GPs, two Practice Nurses and one Health Care Assistant. HCPs perceived that  
6 four key themes influenced the effectiveness of programme implementation: (i) difficulties  
7 raising weight with patients, (ii) how gender affected patient engagement, (iii) availability of  
8 information and resources, and (iv) additional barriers constraining programme promotion.

9  
10

10 Raising the issue of weight with patients:

11  
12

12 Concerns about raising weight may have contributed to slow recruitment, with nurses and  
13 healthcare assistants expressing unease, *'not really up to me... well I talk about it if they want  
14 to.... Better if they [patients] bring it up.'* (Interview 2, Healthcare Assistant). GPs seemed  
15 more comfortable raising weight with patients, but with the caveat that this is easier in the  
16 context of a longer-term GP/patient relationship.

17

*'the people I see I've known for a very long time... it's the rapport you have...if I'd  
18 never met anyone before and they came in for a sore throat I'm not going to say  
19 you're fat...If there was someone I'd known for a long time and it seemed  
20 relevant...I'd mention it.'* (Interview 5, GP).

21  
22

22 Gender and engagement in the referral process:

23  
24  
25  
26  
27  
28  
29  
30  
31  
32  
33  
34  
35  
36  
37  
38  
39  
40  
41  
42  
43  
44  
45  
46  
47  
48  
49  
50  
51  
52  
53  
54  
55  
56  
57  
58  
59  
60

1  
2  
3 1 Gender was highlighted as influencing the referral process, women being more likely than  
4  
5 2 men to seek support for weight. This may help explain the low rate of referral for males  
6  
7  
8 3 (17%):  
9

10 4 *'More women talk about it...men don't really talk about weight...I do mention weight*  
11  
12 5 *to men if I'm doing a well man [sic] but it doesn't come up really...it's a woman*  
13  
14 6 *thing...'* (Interview 3, Practice Nurse).  
15  
16  
17 7

18  
19  
20 8 Availability of information and resources:  
21  
22 9

23  
24 10 Several interviewees highlighted training needs around programme information and  
25  
26 11 resources, (e.g., additional programme information would help to engage patients). For  
27  
28 12 example, the GPs both discussed the longstanding ERS and stated they needed to become  
29  
30 13 more familiar with Momenta, as they had with the ERS:  
31  
32

33 14 *'when we get opportunities to do things in the practice we normally discuss it, let*  
34  
35 15 *everyone know where appropriate forms and information is and it's in your*  
36  
37 16 *head...that didn't happen with this and I don't know why that was.'* (Interview 5, GP).  
38  
39  
40 17

41  
42 18 All HCPs interviewed felt the referral leaflet (provided by programme providers) was  
43  
44 19 important in the process, either as a tool to promote the intervention or to convey information  
45  
46 20 to patients:  
47  
48  
49

50 21 *'The leaflet was good, bright...explained the programme and patients like taking a*  
51  
52 22 *leaflet away.'* (Interview 3, Practice Nurse)  
53  
54  
55 23

56  
57  
58  
59 24  
60

1  
2  
3 1 Additional Barriers to Engagement:  
4  
5

6 2  
7  
8

9 3 Several sub-themes highlighted additional barriers to the referral process. The most  
10  
11 4 prominent sub-themes were around initial BMI referral criteria (25.0-29.9 kg/m<sup>2</sup>) and delayed  
12  
13 programme start. Both implementation factors were beyond the control of the referrers, but  
14 5  
15 consequently amended through iterative refinement during the prototyping process following  
16 6  
17 early data analysis. Both were reported by practice nurses as exacerbating each other:  
18 7

19 8 *'we were referring but then it didn't start so people were not sure what was*  
20  
21 9 *happening [pause]...Think it was more people were needed to start...but you know if*  
22  
23 10 *the BMI was higher then there would have been more.'* (Interview 3, Practice Nurse).  
24  
25  
26  
27  
28  
29

30 12 In one case, a decision was taken to relax the referral criteria, *'...31.5 [kg/m<sup>2</sup>]...was just*  
31  
32 13 *outside so I just referred him.'* (Interview 4, GP).  
33  
34  
35  
36

37 15 Programme location was perceived by HCPs to overcome an existing barrier to the tier three  
38  
39 16 weight management programme, as Momenta was *'round the corner for people,'* as opposed  
40  
41 17 to *'a bit far away at the hospital.'* Cost barriers were also discussed, both with reference to  
42  
43 18 the patient, *'in this sort of area...cost..., if you've got to pay it's a barrier.'* (Interview 4, GP),  
44  
45 19 and to expected targets from Clinical Commissioning Groups (CCG),  
46  
47

48 20 *'we are constantly told by the CCG that we must keep down on numbers and that if*  
49  
50 21 *there are costs attached to this referral that would definitely impact... and that would*  
51  
52 22 *be for all practices.'* (Interview 5, GP)  
53  
54  
55

56 23  
57  
58  
59 24  
60

## 1 **Implementation effectiveness: reflections from participants**

2

3 Three focus groups in the leisure centres allowed programme participant voices to be heard:  
4 three females and one male from Momenta (focus group 1), three males and three females from  
5 Momenta-Fitness (focus group 2) and three females (one of whom emailed her views  
6 separately) from Fitness-only. Across the groups, 12 participants reported having lost weight  
7 and one reported weight gain. Three themes developed: (i) outcomes of the programme, (ii)  
8 facilitators and barriers to engagement, and (iii) raising the issues of weight with HCPs.

9

10 Outcomes of the programme:

11

12 Focus group findings aligned closely with quantitative outcomes in terms of the physical and  
13 psychological benefits of participation: *'[I've] lost a good bit of weight. It's been very  
14 positive for me... I'm feeling a lot more active...'* (Momenta-Fitness, Participant 5).

15 Participants reported a sense of weight loss achievement, increased physical activity levels,  
16 and positive mood states. In addition, elements of the Momenta programme were perceived  
17 as facilitating engagement, including the *'group feeling... I looked forward to it,'* (Momenta-  
18 Fitness, Participant 4), the *'information that we got every week... so very well planned.'*  
19 (Momenta-Fitness, Participant 3) and the ongoing support e.g., *'she phoned me the other day  
20 to see if I was coming,'* (Momenta-Fitness, Participant 4). Momenta participants reflected  
21 back on, and identified and discussed lifestyle factors that related to their initial weight gain  
22 (e.g., *'I did the usual thing... I started eating toffees,'* Momenta-Fitness, Participant 5),  
23 demonstrating both self-awareness and an openness to discussing the topic.

24

25 Facilitators and barriers to engagement:

1  
2  
3 1  
4  
5 2 One participant reported being initially excluded but later allowed to take part, and others  
6  
7 3 raised concerns that the initial BMI threshold for referral (25-29.9 kg/m<sup>2</sup>) was too low, '*was a*  
8  
9 4 *little bit high, BMI...managed to get it down... [and then] the doctor put us forward,*'  
10  
11 5 (Momenta, Participant 2). Data also indicated the importance of subsidised access,  
12  
13 6 particularly important in the context of a deprived region such as this, e.g., '*I also joined*  
14  
15 7 *Weight Watchers for short period of time but found the classes too expensive,*' (Fitness-only,  
16  
17 8 Participant 3, emailed response).  
18  
19  
20  
21  
22 9

23  
24 10 Raising the issue of weight with HCPs:  
25  
26 11

27  
28 12 Some data did suggest implementation was problematic, however, this focused exclusively  
29  
30 13 on the referral process. Participants overwhelmingly felt that they had opened the  
31  
32 14 conversation about weight, as opposed to discussions being initiated by HCPs (e.g., '*my*  
33  
34 15 *glucose levels were quite high but nobody ever said that I was overweight,*' Momenta-  
35  
36 16 Fitness, Participant 4). In addition, participants perceived limitations in HCPs' knowledge of  
37  
38 17 intervention components ('*she [nurse] didn't know anything about it,*' Fitness-only,  
39  
40 18 Participant 1), something with potential to impact on likelihood of referral, and  
41  
42 19 participants' expectations of programme success.  
43  
44  
45  
46  
47 20

## 48 49 21 **Preliminary outcome domains** 50 51 22

52  
53 23 Of all referrals, 153 (84%) attended the baseline measurement session and 78 (51% of those  
54  
55 24 who started) attended the 12-week measurement session. Uptake and adherence varied by  
56  
57 25 programme group (table 2).  
58  
59  
60

1 **Table 2. Programme uptake, adherence and attendance.**

| <b>Uptake (week 1), adherence and retention (both week 12)</b> | <b>Momenta-Fitness</b> |                     | <b>Momenta only</b> |                     | <b>Fitness only</b> |                     |
|----------------------------------------------------------------|------------------------|---------------------|---------------------|---------------------|---------------------|---------------------|
| Number referred                                                |                        | 58                  |                     | 59                  |                     | 65                  |
| Uptake* (n, %)                                                 |                        | 54 (93.1%)          |                     | 50 (84.7%)          |                     | 49 (75.4%)          |
| Uptake retention** (n, %)                                      |                        | 35 (64.8%)          |                     | 27 (54.0%)          |                     | 16 (32.7%)          |
| Uptake adherence^ (n, %)                                       |                        | 34 (63.0%)          |                     | 26 (52.0%)          |                     | 8 (50.0%)           |
| Overall retention*** (n, %)                                    |                        | 35 (60.3%)          |                     | 27 (45.8%)          |                     | 16 (24.6%)          |
| Overall adherence^^ (n, %)                                     |                        | 34 (58.6%)          |                     | 26 (44.1%)          |                     | 8 (12.3%)           |
| <b>Momenta session attendance</b>                              | <b>Momenta-Fitness</b> |                     | <b>Momenta only</b> |                     | <b>Fitness only</b> |                     |
|                                                                | <b>n</b>               | <b>Median (IQR)</b> | <b>n</b>            | <b>Median (IQR)</b> |                     |                     |
| Uptake                                                         | 54                     | 9.0 (7.3)           | 50                  | 9.0 (8.0)           |                     |                     |
| Dropouts                                                       | 19                     | 3.0 (3.0)           | 23                  | 3.0 (5.0)           |                     | N/A                 |
| Completers^^^                                                  | 35                     | 10.0 (2.0)          | 27                  | 11.0 (1.3)          |                     |                     |
| <b>Exercise session attendance</b>                             | <b>Momenta-Fitness</b> |                     | <b>Momenta only</b> |                     | <b>Fitness only</b> |                     |
|                                                                | <b>n</b>               | <b>Median (IQR)</b> | <b>n</b>            | <b>Median (IQR)</b> | <b>n</b>            | <b>Median (IQR)</b> |
| Uptake                                                         | 54                     | 7.0 (16.3)          | 50                  | 0.0 (4.5)           | 49                  | 0.0 (1.5)           |
| Dropouts                                                       | 19                     | 0.0 (1.0)           | 23                  | 0.0 (0.0)           | 33                  | 0.0 (0.0)           |
| Completers^^^                                                  | 35                     | 10.0 (14.0)         | 26                  | 0.0 (5.0)           | 16                  | 4.5 (18.0)          |

*Uptake\** participant attended baseline assessment; *Uptake retention\*\** % of participants who attended the 12-week assessment out of those who attended the baseline assessment; *Uptake adherence^* % of participants who attended the baseline assessment who also attended  $\geq 8$  Momenta sessions (Momenta-Fitness and Momenta only) or gym sessions (fitness only); *Overall retention\*\*\** % of all those referred who attended both baseline and 12-week assessment; *Overall adherence^^* % of all those referred who attended  $\geq$  eight Momenta sessions (Momenta-Fitness and Momenta only) or exercise sessions (fitness only); *Completers^^^* those who completed the 12-week assessment

3  
4 Physiological and psychological data were not normally distributed. Quantitative data are  
5 presented as exploratory, due to the small sample size and are presented here for information  
6 and general description. No differences were found between programme groups either at  
7 baseline or at 12 weeks, for any measures. Despite the small sample size, within-group  
8 changes between baseline and 12 weeks were evident for weight, BMI and waist  
9 circumference for Momenta-Fitness, and Momenta (Table 3). Follow-up analysis at 52-weeks  
10 (available sub-sample) suggested changes were maintained for Momenta-Fitness ( $n=18$ )  
11 only.

12



1 **Table 3. Weight, BMI and waist circumference change.**

| <b>End of programme results</b> | <b>Median (IQR)<br/>Baseline</b> | <b>Median (IQR)<br/>12 weeks</b> | <b>z</b> | <b>Median (IQR)<br/>Change</b> |
|---------------------------------|----------------------------------|----------------------------------|----------|--------------------------------|
| <b>Weight (kg)</b>              |                                  |                                  |          |                                |
| Momenta-Fitness (n=35)          | 88.9 (80.5 - 100.0)              | 88.0 (77.2 - 95.8)               | -4.531   | -2.9 (-5.1 - -1.6)             |
| Momenta only (n=26)             | 87.8 (74.5 - 77.0)               | 83.3 (74.5 - 92.5)               | -4.344   | -2.9 (-5.0 - -2.0)             |
| Fitness only (n=15)             | 76.2 (71.6 - 86.9)               | 76.6 (70.4 - 84.6)               | -0.879   | 0.0 (-3.2 - 1.0)               |
| <b>BMI (kg/m<sup>2</sup>)</b>   |                                  |                                  |          |                                |
| Momenta-Fitness (n=35)          | 32.0 (30.3 - 35.7)               | 31.3 (29.2 - 35.3)               | -4.494   | -1.1 (-1.9 - -0.6)             |
| Momenta only (n=26)             | 32.0 (30.0 - 34.5)               | 31.3 (28.6 - 33.6)               | -4.356   | -1.2 (-1.6 - -0.8)             |
| Fitness only (n=14)             | 29.2 (27.3 - 33.0)               | 29.7 (27.0 - 33.3)               | -0.454   | 0.1 (-1.2 - +0.4)              |
| <b>Waist circumference (cm)</b> |                                  |                                  |          |                                |
| Momenta-fitness (n=35)          | 106.0 (98.0 - 115.0)             | 99.0 (93.0 - 110.0)              | -4.996   | -7.0 (-9.5 - -5.0)             |
| Momenta only (n=25)             | 108.0 (99.5 - 114.5)             | 101.0 (93.8 - 111.5)             | -4.166   | -5.0 (-7.3 - -2.5)             |
| Fitness only (n=11)             | 90.0 (87.0 - 95.0)               | 91.0 (90.0 - 96.0)               | 0.358    | 1.0 (-3.0 - 3.0)               |
| <b>52-week follow-up</b>        | <b>Median (IQR)<br/>Baseline</b> | <b>Median (IQR)<br/>52 weeks</b> | <b>z</b> | <b>Median (IQR)<br/>Change</b> |
| <b>Weight (kg)</b>              |                                  |                                  |          |                                |
| Momenta-Fitness (n=18)          | 95.2 (87.1 - 101.4)              | 91.4 (82.7 - 95.9)               | -3.006   | -4.8 (-6.2 - -1.5)             |
| Momenta only (n=16)             | 84.7 (72.3 - 95.2)               | 82.7 (73.2 - 94.6)               | -1.533   | -0.7 (-7.6 - 0.8)              |
| *Fitness only (n=3)             | 73.4 (69.5 - 80.2)               | 70.3 (66.0 - 87.0)               |          | 0.9 (-7.4 - 6.9)               |
| <b>BMI (kg/m<sup>2</sup>)</b>   |                                  |                                  |          |                                |
| Momenta-Fitness (n=18)          | 32.0 (30.49 - 35.1)              | 30.8 (28.7 - 34.0)               | -3.157   | -1.7 (-2.0 - -0.6)             |
| Momenta only (n=16)             | 31.7 (29.3 - 33.9)               | 31.1 (26.7 - 33.6)               | -1.603   | -0.3 (-2.3 - 0.3)              |
| *Fitness only (n=3)             | 27.6 (27.5 - 30.5)               | 27.8 (24.8 - 33.2)               |          | 0.3 (24.8 - 33.2)              |
| <b>Waist circumference (cm)</b> |                                  |                                  |          |                                |
| Momenta-Fitness (n=18)          | 109.0 (101.0 - 114.8)            | 100.5 (94.8 - 107.3)             | -3.221   | -6.0 (-13.3 - -1.75)           |
| Momenta only (n=16)             | 106.0 (94.5 - 115.8)             | 103.5 (98.5 - 113.3)             | -0.780   | -2.5 (-9.0 - -10.0)            |
| *Fitness only (n=3)             | 89.0 (87.0 - 95.0)               | 90.0 (90.0 - 101.0)              |          | 3.0 (90.0 - 101.0)             |

\* Fitness only n=3 therefore median and range reported and no statistical test completed.

3  
4 Differences in mental wellbeing, depression and anxiety were not apparent between groups,  
5 however improvements in mental wellbeing, and reductions in depression and anxiety were  
6 suggested between baseline and 12 weeks for Momenta-Fitness, and Momenta groups only  
7 (Table 4), although the magnitude of change was similar for all groups. Sub-sample analysis  
8 at 52-weeks demonstrated potential for improvements for wellbeing and depression to be  
9 maintained for Momenta-Fitness (n=18), and wellbeing and anxiety for Momenta (n=16).

10

**Table 4. Wellbeing, anxiety and depression measures change.**

| <b>End of programme results</b> | <b>Median (IQR)<br/>Baseline</b> | <b>Median (IQR)<br/>12 weeks</b> | <b>z</b> | <b>Median (IQR)<br/>Change</b> |
|---------------------------------|----------------------------------|----------------------------------|----------|--------------------------------|
| <b>Mental wellbeing scale</b>   |                                  |                                  |          |                                |
| Momenta-Fitness (n=29)          | 46.0 (40.0 - 51.5)               | 53.0 (40.0 - 51.5)               | 3.810    | 5.0 (1.5 - 12.0)               |
| Momenta only (n=23)             | 49.0 (39.0 - 58.0)               | 55.0 (51.0 - 63.0)               | 2.818    | 6.0 (-1.0 - 10.0)              |
| Fitness only (n=13)             | 47.0 (40.5 - 59.5)               | 46.0 (42.0 - 63.5)               | 0.157    | 0.0 (-4.0 - 5.0)               |
| <b>Anxiety scale</b>            |                                  |                                  |          |                                |
| Momenta-Fitness (n=28)          | 5.5 (4.0 - 9.8)                  | 4.5 (2.0 - 7.0)                  | -3.027   | -1.0 (-3.0 - 1.0)              |
| Momenta only (n=23)             | 8.0 (6.0 - 10.0)                 | 4.0 (2.5 - 9.0)                  | -2.329   | -1.0 (-3.0 - 0.0)              |
| Fitness only (n=13)             | 8.0 (3.5 - 10.0)                 | 6.0 (4.0 - 9.0)                  | -0.499   | -1.0 (-2.0 - 2.0)              |
| <b>Depression scale</b>         |                                  |                                  |          |                                |
| Momenta-Fitness (n=28)          | 5.5 (3.3 - 8.0)                  | 2.0 (1.0 - 6.0)                  | -3.214   | -2.5 (-4.8 - -0.3)             |
| Momenta only (n=23)             | 5.0 (3.0 - 7.5)                  | 3.0 (1.0 - 5.0)                  | -3.049   | -1.0 (-4.5 - 1.0)              |
| Fitness only (n=13)             | 4.0 (2.0 - 8.5)                  | 2.0 (2.0 - 7.0)                  | -1.226   | -2.0 (-4.5 - 0.0)              |
| <b>52-week follow-up</b>        | <b>Median (IQR)<br/>Baseline</b> | <b>Median (IQR)<br/>52 weeks</b> | <b>z</b> | <b>Median (IQR)<br/>Change</b> |
| <b>Mental wellbeing scale</b>   |                                  |                                  |          |                                |
| Momenta-Fitness (n=15)          | 44.0 (39.0 - 52.0)               | 55.0 (48.0 - 59.0)               | 2.984    | 5.0 (3.0 - 15.0)               |
| Momenta only (n=13)             | 58.0 (47.5 - 59.0)               | 56.0 (54.0 - 63.5)               | 2.282    | 4.0 (0.5 - 6.5)                |
| *Fitness only (n=3)             | 47.0 (34.0 - 64.0)               | 58.0 (45.0 - 60.0)               |          | -2.0 (-6.0 - 26.0)             |
| <b>Anxiety scale</b>            |                                  |                                  |          |                                |
| Momenta-Fitness (n=15)          | 6.0 (2.0 - 10.0)                 | 2.0 (1.0 - 7.0)                  | -1.785   | -3.0 (-6.0 - 0.0)              |
| Momenta only (n=15)             | 7.0 (4.0 - 9.0)                  | 5.0 (1.0 - 8.0)                  | -1.990   | -3.0 (-4.0 - 0.0)              |
| *Fitness only (n=3)             | 9.0 (5.0 - 10.0)                 | 2.0 (1.0 - 8.0)                  |          | -3.0 (-8.00 - -2.0)            |
| <b>Depression scale</b>         |                                  |                                  |          |                                |
| Momenta-Fitness (n=15)          | 7.0 (3.3 - 11.3)                 | 3.5 (1.0 - 6.0)                  | -2.908   | -3.5 (-6.3 - -0.8)             |
| Momenta only (n=15)             | 4.0 (1.0 - 6.0)                  | 3.0 (1.0 - 4.0)                  | -0.762   | 0.0 (-2.0 - 1.0)               |
| *Fitness only (n=3)             | 3.0 (0.0 - 8.0)                  | 2.0 (1.0 - 8.0)                  |          | 1.0 (-8.0 - 5.0)               |

\* Fitness only n=3 therefore median and range reported and no statistical test completed.

Overall, the results suggested those who participated in the two groups incorporating Momenta, had enhanced physical and psychological health indicators from baseline, whereas those who had only free fitness membership did not. From the small follow-up sample, there is scope to suggest that the combination of Momenta and fitness membership may produce favourable outcomes at 52 weeks.

## 1 **Iterative refinements throughout the evaluation process**

2

3 Here we list a number of implementation adjustments which were made throughout the  
4 evaluation process, facilitated via the prototyping framework. Real-time advice from  
5 Commissioners was considered during early stages of implementation, regarding the nature  
6 of comparison offers (e.g. fitness access) and thus initial design and outcome measurements  
7 were adapted prior to referrals being made. To better-target recruitment and change the  
8 process of engagement at referral point, entry criteria were altered ( $BMI \geq 30 \text{ kg/m}^2$ ) mid-way  
9 through programme delivery. On-site implementation of the service offer was adapted in  
10 response to delivery staff feedback: increased resource was made available, for example  
11 additional staffing to support delivery for the first wave of referrals. Furthermore, staff were  
12 given additional time for Momenta session preparation and session delivery times were  
13 extended. Follow-up activities (i.e., text or telephone contact) were implemented by staff  
14 during the process, to encourage adherence.

15

## 16 **DISCUSSION**

17

18 We explored ‘prototyping’, as a cost-effective and time-efficient approach to public health  
19 evaluation, via an ‘off-the-shelf’ weight management programme implemented in a local  
20 context of mixed and high deprivation.

21

22 Experiences of both referrers and referrals highlighted that HCPs needed to be better-  
23 informed and more confident raising weight-related conversations. Whilst patient-led action  
24 is desirable, staff reluctance to raise weight issues may mean that opportunities for  
25 engagement of less knowledgeable or motivated patients will be missed. The problematic

26

1 positioning of GPs within obesity care has been highlighted previously,<sup>35</sup> with a range of  
2 strategies to change HCPs' behaviour resulting in little or no change to patients' weight. A  
3 practical training need is highlighted for those working at the patient-practitioner interface,  
4 however communication with patients about weight may well be hindered by the 'stigma'  
5 attached to obesity.<sup>36</sup> This has wider implications for patient outcomes and requires further  
6 exploration through the implementation process. Additionally, HPCs need better  
7 understanding of referral-based public health programmes offered. Despite efforts of  
8 programme and public health managers, awareness was reportedly low for some referring  
9 professionals. We suggest consideration of resource-efficient ways to signpost both HPCs  
10 and patients themselves as part of the implementation process.

11  
12 This programme was delivered across a social gradient in a region with low health indices  
13 and areas of high deprivation. Some issues in relation to inequalities and service access for  
14 future community-based weight management programmes were highlighted. Only 17% of  
15 referrals to Momenta were males. Gender bias in weight management referral has been  
16 reported elsewhere,<sup>37-38</sup> and interviews showed that practitioners struggled to raise the topic  
17 of weight with male patients. Alternative referral strategies have been employed in other  
18 settings in an attempt to overcome this.<sup>39</sup> Marketing in other community spaces, or targeted  
19 postal referrals could be explored in future implementation. The initial decision to restrict  
20 referral to overweight-only substantially impacted on referral rates, with HCPs and referrals  
21 indicating they felt limited until this restriction was reversed. Had this continued, worsening  
22 health inequalities may have been an unintended consequence, something to be actively  
23 avoided within public health programmes<sup>40</sup>. The roles of, and interactions between, those  
24 operating in the 'system' (i.e. the context within which the intervention operates) must be  
25 considered at the point of implementation to minimise any impact from unintended

1  
2  
3 1 consequences.<sup>5</sup> In practical terms, this may be through continued dialogue with  
4  
5 2 commissioners, referring professionals and referrals themselves, something which  
6  
7 3 prototyping evaluation allows.  
8  
9  
10 4  
11  
12 5 Quantitative data should be interpreted as exploratory, due to the relatively small number of  
13  
14 6 complete cases, however lessons can be learned from these data both in terms of preliminary  
15  
16 7 outcomes and engagement/dropout. Participation in Momenta and Momenta-Fitness resulted  
17  
18 8 in 12-week weight loss for those who completed the programme. Free fitness membership  
19  
20 9 without the weight-management programme was poorly engaged with and did not lead to  
21  
22 10 weight change. A small sub-sample who attended follow-up demonstrated that after one year,  
23  
24 11 weight reductions equivalent to ~4% could be maintained for Momenta-Fitness. We caution  
25  
26 12 that while this might be best interpreted as hypothesis-generating for future evaluations,  
27  
28 13 given these effects emerged despite an underpowered sample it is worth briefly considering  
29  
30 14 potential mechanisms here. Providing free access to fitness facilities alongside the behaviour  
31  
32 15 change programme may allow for continuous and self-driven behaviour change<sup>41</sup> and  
33  
34 16 sustaining optimal changes in adiposity over 12 months in those who remained engaged.<sup>42</sup>  
35  
36 17 Swipe card monitoring during the initial 12-week period indicated that fitness sessions were  
37  
38 18 accessed an average 10 occasions for this group, whereas no access was apparent for  
39  
40 19 Momenta, despite Momenta sessions being held in leisure centres. This could be important  
41  
42 20 for community providers making decisions about delivery location. Both Momenta groups  
43  
44 21 reported improved wellbeing, and reduced anxiety and depression at 12-weeks. The changes  
45  
46 22 observed, though small, could be argued to approach being functionally and clinically  
47  
48 23 meaningful, with a minimal important difference of 1.5 points previously identified for the  
49  
50 24 HADS, for example<sup>43</sup>. The behavioural intervention may drive this effect. This is consistent  
51  
52 25 with previous work reporting co-varying changes in weight loss, depression, and quality of  
53  
54  
55  
56  
57  
58  
59  
60

1  
2  
3 1 life in weight management services.<sup>44</sup> It is unclear whether the primary mechanism was  
4  
5 2 weight loss, or the wider social benefits of participation. Both were valued in the qualitative  
6  
7 3 data. Our preliminary evidence of maintained improvements in wellbeing for these groups at  
8  
9 4 52 weeks is particularly relevant given previously evidenced associations between poor  
10  
11 5 mental health, and obesity and overweight status.<sup>45</sup> Long-term follow-up rates will need to be  
12  
13 6 considered in future similar programmes and we suggest year-long follow-up (at least) is  
14  
15 7 included as a key programme component from the outset. Consideration should be given to  
16  
17 8 how providers can maintain contact with participants after programme end to increase  
18  
19 9 likelihood of successful follow-up. Potential ‘light touch’ support after 12 weeks may be  
20  
21 10 helpful and other means of obtaining follow-up data should be explored where service users  
22  
23 11 disengage. Reasons for disengagement might also be usefully explored in future work.  
24  
25  
26  
27  
28  
29  
30

31 13 Given that no systematic problems emerged with service-user’s experiences of the  
32  
33 14 programme itself, our findings lend support to a streamlined approach to involvement of all  
34  
35 15 stakeholders in programme implementation. We suggest that prototyping demonstrates  
36  
37 16 opportunities for off-the-shelf programmes to be pragmatically moulded to local context, in  
38  
39 17 real-time. Many of the iterative changes made were staff-driven. This demonstrates that real-  
40  
41 18 time consideration of feedback from on-site delivery teams can be important to the  
42  
43 19 implementation process. Some of the adjustments required commissioning action, as they had  
44  
45 20 resource implications; others needed advice from the evaluation team. Interestingly changes  
46  
47 21 made throughout the process generally focused on both staff and participant experience.  
48  
49  
50  
51  
52  
53

54 23 Emergence of some negative experiences of referral suggests, however, that prototyping can  
55  
56 24 be problematic without networks or channels for ensuring key outcomes are widely  
57  
58 25 communicated to relevant stakeholders. Overall, the evaluation demonstrated that a balance is  
59  
60

1  
2  
3 1 needed to allow quick and efficient adaptation of off-the-shelf programmes, but with focused  
4  
5 2 professional user engagement in the early stages of development. The prototyping approach  
6  
7 3 had particular utility given that project resources were limited and meant that issues were  
8  
9 4 identified and acted upon rapidly. While the programme may have progressed similarly  
10  
11 5 without this, prototyping provided a greater structure for, and confidence in, on-going  
12  
13 6 refinements. This was achieved via the support provided by academics, public health  
14  
15 7 practitioners and providers. Fundamentally, adopting a prototyping approach enabled the  
16  
17 8 delivery of a new service to an in-need population, alongside the generation of initial  
18  
19 9 evidence of local effectiveness. A minimum of 1 kg weight-loss at 3 months, and 0.7 kg at  
20  
21 10 12-months have been suggested as thresholds to influence decisions over commissioning of  
22  
23 11 weight-loss services.<sup>46</sup> Our preliminary data suggests that Momenta may have potential to  
24  
25 12 meet or even exceed these thresholds, showing particular promise when implemented in  
26  
27 13 conjunction with free fitness provision.  
28  
29  
30  
31  
32  
33  
34

35 15 Demonstrating preliminary effectiveness is of limited use, however, unless a successful  
36  
37 16 programme in one area may be adapted and implemented to suit a different context, for  
38  
39 17 example through sharing local-level knowledge, interactions and behaviours of individuals  
40  
41 18 within different parts of that system.<sup>47</sup> The process for scaling-up of effective health  
42  
43 19 interventions to broader policy and practice takes years<sup>48</sup> and certainly within the obesity  
44  
45 20 literature, has been dominated by initiatives that consider effectiveness but not  
46  
47 21 implementation across specific settings.<sup>49-50</sup> We recommend prototyping might be built into  
48  
49 22 larger public health evaluations providing that the original programme has a sound theoretical  
50  
51 23 basis, and iterative refinement is engaged with by all stakeholders from the outset.  
52  
53  
54  
55  
56  
57  
58  
59  
60

1  
2  
3 1 **CONCLUSION**  
4

5 2 The Momenta programme was experienced positively by those who attended. Issues with the  
6  
7 3 referral process need to be explored further, however other refinements were feasible during  
8  
9 4 delivery. Promising preliminary outcome data for completers of ‘Momenta’, particularly in  
10  
11 5 conjunction with a free fitness offer, implies potential for the scheme within future  
12  
13 6 commissioning. This evaluation extends the literature by exploring prototyping for a complex  
14  
15 7 problem, community weight-management, in a challenging setting, demonstrating  
16  
17 8 streamlined implementation of an ‘off-the-shelf’ weight management programme. This  
18  
19 9 resource-effective approach is highly relevant in the context of health inequalities and public  
20  
21 10 health sector funding constraints.  
22  
23  
24  
25  
26  
27  
28  
29  
30  
31  
32  
33  
34  
35  
36  
37  
38  
39  
40  
41  
42  
43  
44  
45  
46  
47  
48  
49  
50  
51  
52  
53  
54  
55  
56  
57  
58  
59  
60



1 **Acknowledgements:** Many thanks to Jordan Bell, Nicole Rowley and Ross Davison, who  
2 collected and collated raw quantitative data.

3  
4 **Author Contributions:** CDR, CH and EO contributed to design of the quantitative  
5 evaluation, data analysis and preparation the final document. LN contributed to design and  
6 analyses of the qualitative evaluation component. TF contributed to qualitative design and  
7 analysis and preparation of the final document. AL contributed to design of the quantitative  
8 evaluation and preparation of the final document.

9  
10 **Funding:** The quantitative evaluation component was supported by funding from the  
11 Wolfson Research Institute for Health and Wellbeing, Durham University. Amelia Lake is a  
12 member of Fuse, the Centre for Translational Research in Public Health  
13 (www.fuse.ac.uk). Fuse is a UK Clinical Research Collaboration (UKCRC) Public Health  
14 Research Centre of Excellence. Funding for Fuse from the British Heart Foundation, Cancer  
15 Research UK, Economic and Social Research Council, Medical Research Council, the  
16 National Institute for Health Research, under the auspices of the UKCRC, is gratefully  
17 acknowledged. The views expressed in this paper do not necessarily represent those of the  
18 funders or UKCRC. The funders had no role in study design, data collection and analysis,  
19 decision to publish, or preparation of the manuscript.

20  
21 **Competing interests:** CH is a former employee of the Leisure Trust and was instrumental in  
22 initiating the evaluation. She was subsequently employed as a research assistant at Durham  
23 University, however was not involved in any data collection or entry, only accessing an  
24 anonymised database submitted to the University. LN was a Public Health Improvement

1  
2  
3 1 Manager within the Public Health Team and had responsibility for commissioning the  
4  
5 2 Momenta programme. The qualitative evaluation component was submitted in partial  
6  
7 3 fulfilment of her Master's in Public Health at Newcastle University.  
8  
9  
10  
11 4

12  
13 5 **Participant consent:** Consent was obtained for face-to-face interviews and focus groups.  
14  
15 6 Service users were informed in writing of the nature of the quantitative service evaluation and  
16  
17 7 how to withdraw from it. The presented data are anonymised with risk of identification low.  
18  
19  
20  
21 8

22  
23  
24 9 **Ethics approval:** Ethical advice was sought from the local Research Manager of North of  
25  
26 10 England Commissioning Support, and this project was classed as a service evaluation in line  
27  
28 11 with National Research Ethics Service guidance.  
29  
30  
31 12

32  
33  
34 13 **Data availability statement:** No additional data are available because this was a service  
35  
36 14 evaluation.  
37  
38  
39  
40 15

1  
2  
3 **1 REFERENCES**  
4  
5 2  
6 3  
7 4

- 8 1. Haines A, Kuruvilla S, Borchert M. Bridging the implementation gap between knowledge  
9 and action for health. (Theme Papers). *Bull World Health Organ* 2004;82:724.  
10  
11  
12  
13 6 2. Curran GM, Bauer M, Mittman B, *et al.* Effectiveness-implementation Hybrid Designs:  
14 Combining Elements of Clinical Effectiveness and Implementation Research to Enhance  
15 Public Health Impact. *Med Care* 2012;50:217-26.  
16 7  
17  
18 8  
19  
20  
21  
22 9 3. Sales A, Smith J, Curran G, *et al.* Models, Strategies, and Tools: Theory in Implementing  
23 Evidence-Based Findings into Health Care Practice. *J Gen Int Med* 2006;21:S43-S9.  
24  
25 10  
26  
27  
28  
29 11 4. Kilbourne AM, Neumann MS, Pincus HA, *et al.* Implementing evidence-based  
30 interventions in health care: application of the replicating effective programs framework.  
31  
32 12  
33  
34 13 *Implement Sci* 2007;2:42.  
35  
36  
37  
38 14 5. Medical Research Council. Developing and evaluating complex interventions: new  
39 guidance. UK: Medical Research Council, 2006.  
40  
41 15  
42  
43 16 <https://mrc.ukri.org/documents/pdf/developing-and-evaluating-complex-interventions/>.  
44  
45 17 (Accessed 10 Aug 2018)  
46  
47  
48  
49 18 6. Oliver K, Kothari A, Mays N. The dark side of coproduction: do the costs outweigh the  
50 benefits for health research? *Health Research Policy and Systems* 2019;17:33.  
51  
52 19  
53  
54  
55  
56 20  
57  
58  
59  
60

- 1 7. Meisinger C, Döring A, Thorand B, *et al.* Body fat distribution and risk of type 2 diabetes  
2 in the general population: are there differences between men and women? The  
3 MONICA/KORA Augsburg Cohort Study. *Am J Clin Nutr* 2006;84:483-9.
- 4 8. Bhaskaran K, Douglas I, Forbes H, *et al.* Body-mass index and risk of 22 specific  
5 cancers: a population-based cohort study of 5·24 million UK adults. *Lancet*  
6 2014;384:755-65.
- 7 9. Zhang C, Rexrode KM, Van Dam RM, *et al.* Abdominal obesity and the risk of all-cause,  
8 cardiovascular, and cancer mortality: sixteen years of follow-up in US women. *Circ*  
9 2008;117:1658-67.
- 10 10. Kolotkin RL, Andersen JR. A systematic review of reviews: exploring the relationship  
11 between obesity, weight loss and health-related quality of life. *Clin Obes* 2017;7:273-89.
- 12 11. Simon GE, Von Korff M, Saunders K, *et al.* Association between obesity and psychiatric  
13 disorders in the us adult population. *Arch Gen Psychiatry* 2006;63(7):824-30.
- 14 12. Public Health England. *Health matters: obesity and the food environment environment.*  
15 UK: Public Health England, 2017. [https://www.gov.uk/government/publications/health-](https://www.gov.uk/government/publications/health-matters-obesity-and-the-food-environment/health-matters-obesity-and-the-food-environment--2)  
16 [matters-obesity-and-the-food-environment/health-matters-obesity-and-the-food-](https://www.gov.uk/government/publications/health-matters-obesity-and-the-food-environment/health-matters-obesity-and-the-food-environment--2)  
17 [environment--2.](https://www.gov.uk/government/publications/health-matters-obesity-and-the-food-environment/health-matters-obesity-and-the-food-environment--2) (Accessed 10 Aug 2018)
- 18 13. World Health Organisation. *Global status report on noncommunicable diseases 2014.*  
19 Geneva: World Health Organisation, 2014.

- 1  
2  
3 1 [https://apps.who.int/iris/bitstream/handle/10665/148114/9789241564854\\_eng.pdf;jsessio](https://apps.who.int/iris/bitstream/handle/10665/148114/9789241564854_eng.pdf;jsessionid=A043D0E63AACA67752CC3294A1EBD7A3?sequence=1)  
4  
5 2 [nid=A043D0E63AACA67752CC3294A1EBD7A3?sequence=1](https://apps.who.int/iris/bitstream/handle/10665/148114/9789241564854_eng.pdf;jsessionid=A043D0E63AACA67752CC3294A1EBD7A3?sequence=1). (Accessed 04 Feb 2019)  
6  
7  
8  
9  
10 3 14. Bambra C, Hillier F, Cairns J, *et al*. How effective are interventions at reducing  
11  
12 4 socioeconomic inequalities in obesity among children and adults? Two systematic  
13  
14 5 reviews. *Public Health Res* 2015;3.  
15  
16  
17  
18 6 15. Bull ER, Dombrowski SU, McCleary N, *et al*. Are interventions for low-income groups  
19  
20 7 effective in changing healthy eating, physical activity and smoking behaviours? A  
21  
22 8 systematic review and meta-analysis. *BMJ Open*. 2014;4:e006046.  
23  
24  
25  
26  
27 9 16. Office for National Statistics. *Dataset: Regional gross value added (balanced) by*  
28  
29 10 *combined authority in the UK*. UK: Office for National Statistics, 2017.  
30  
31 11 [https://www.ons.gov.uk/economy/grossvalueaddedgva/datasets/regionalgrossvalueaddedb](https://www.ons.gov.uk/economy/grossvalueaddedgva/datasets/regionalgrossvalueaddedbalancedbycombinedauthorityintheuk)  
32  
33 12 [alancedbycombinedauthorityintheuk](https://www.ons.gov.uk/economy/grossvalueaddedgva/datasets/regionalgrossvalueaddedbalancedbycombinedauthorityintheuk). (Accessed 10 Aug 2018)  
34  
35  
36  
37  
38 13 17. Public Health England. *Work, worklessness and health: local infographic tool*. UK:  
39  
40 14 Public Health England, 2018. [https://www.gov.uk/government/publications/work-](https://www.gov.uk/government/publications/work-worklessness-and-health-local-infographic-tool)  
41  
42 15 [worklessness-and-health-local-infographic-tool](https://www.gov.uk/government/publications/work-worklessness-and-health-local-infographic-tool). (Accessed 10 Aug 2018)  
43  
44  
45  
46  
47 16 18. Northumberland County Council. *Public Health Service Statement 2017/18*.  
48  
49 17 Northumberland: Northumberland County Council, 2017.  
50  
51 18 [https://northumberland.gov.uk/NorthumberlandCountyCouncil/media/About-the-](https://northumberland.gov.uk/NorthumberlandCountyCouncil/media/About-the-Council/Performance/Service%20Statements%202016/2017-Public-Health-Service-Statement-2017-18.pdf)  
52  
53 19 [Council/Performance/Service%20Statements%202016/2017-Public-Health-Service-](https://northumberland.gov.uk/NorthumberlandCountyCouncil/media/About-the-Council/Performance/Service%20Statements%202016/2017-Public-Health-Service-Statement-2017-18.pdf)  
54  
55 20 [Statement-2017-18.pdf](https://northumberland.gov.uk/NorthumberlandCountyCouncil/media/About-the-Council/Performance/Service%20Statements%202016/2017-Public-Health-Service-Statement-2017-18.pdf). (Accessed 10 Aug 2018)  
56  
57  
58  
59  
60

- 1  
2  
3 1 19. Public Health England. *Local Authority Health Profiles*. UK: Public Health England,  
4  
5 2 2019. <https://fingertips.phe.org.uk/profile/health->  
6  
7 3 [profiles/data#page/0/gid/1938132701/pat/6/par/E12000001/ati/102/are/E06000057/iid/10](https://fingertips.phe.org.uk/profile/health-profiles/data#page/0/gid/1938132701/pat/6/par/E12000001/ati/102/are/E06000057/iid/101/age/169/sex/4)  
8  
9 4 [101/age/169/sex/4](https://fingertips.phe.org.uk/profile/health-profiles/data#page/0/gid/1938132701/pat/6/par/E12000001/ati/102/are/E06000057/iid/101/age/169/sex/4). (Accessed 01 Feb 2019)  
10  
11  
12  
13  
14 5 20. Lister C, Payne H, Hanson CL, *et al*. The Public Health Innovation Model: Merging  
15  
16 6 Private Sector Processes with Public Health Strengths. *Front Public Health* 2017;5:192.  
17  
18  
19  
20  
21 7 21. Parry GJ, Carson-Stevens A, Luff DF, *et al*. Recommendations for evaluation of health  
22  
23 8 care improvement initiatives. *Acad Pediatr* 2013 Nov-Dec;13(6 Suppl):S23-30.  
24  
25  
26  
27  
28 9 22. Hawkins J, Madden K, Fletcher A, *et al*. Development of a framework for the co-  
29  
30 10 production and prototyping of public health interventions. *BMC Public Health*  
31  
32 11 2017;17:689.  
33  
34  
35  
36  
37 12 23. Stevens VJ, Funk KL, Brantley PJ, *et al*. Design and implementation of an interactive  
38  
39 13 website to support long-term maintenance of weight loss. *J Med Internet Res*  
40  
41 14 2008;10(1):e1.  
42  
43  
44  
45  
46 15 24. Discover Momenta Ltd. *Momenta*. UK: Discover Momenta Ltd, 2013:  
47  
48 16 <http://discovermomenta.com/>. (Accessed 10 Aug 2018)  
49  
50  
51  
52 17 25. Hanson CL. *Advancing understanding of effective exercise on referral: a mixed methods*  
53  
54 18 *evaluation of the Northumberland scheme*. PhD Thesis, Durham University, 2017.  
55  
56 19 <http://etheses.dur.ac.uk/12162/>. (Accessed 10 Aug 2018)  
57  
58  
59  
60

- 1  
2  
3 1 26. Hanson CL, Allin LJ, Ellis JG, *et al.* An evaluation of the efficacy of the exercise on  
4  
5 2 referral scheme in Northumberland, UK: association with physical activity and predictors  
6  
7 3 of engagement. A naturalistic observation study. *BMJ Open* 2013;3:e002849  
8  
9  
10  
11  
12 4 27. Sacher PM, Kolotourou M, Chadwick PM, *et al.* Randomized Controlled Trial of the  
13  
14 5 MEND Program: A Family-based Community Intervention for Childhood Obesity. *Obes*  
15  
16 6 2012;18:S62-S8.  
17  
18  
19  
20  
21 7 28. Leech N, Onwuegbuzie A. A typology of mixed methods research designs. *Qual Quant*  
22  
23 8 2009;43:265-75.  
24  
25  
26  
27 9 29. Marfell-Jones M, Olds T, Stewart A, *et al.* *International Standards for Anthropometric*  
28  
29 10 *Assessment (2007)*. Potchefstroom, South Africa: International Society for the  
30  
31 11 Advancement of Kinanthropometry, 2007.  
32  
33  
34  
35  
36 12 30. Tong A, Sainsbury P, Craig J. Consolidated criteria for reporting qualitative research  
37  
38 13 (COREQ): a 32-item checklist for interviews and focus groups. *Int J Qual. Health Care*  
39  
40 14 2007;19:349–57  
41  
42  
43  
44  
45 15 31. World Health Organisation. *BMI Classification 2006*. Geneva: World Health  
46  
47 16 Organisation, 2006. [http://apps.who.int/bmi/index.jsp?introPage=intro\\_3.html](http://apps.who.int/bmi/index.jsp?introPage=intro_3.html). (Accessed  
48  
49 17 10 Aug 2018)  
50  
51  
52  
53  
54 18 32. Clarke A, Friede T, Putz R, *et al.* Warwick-Edinburgh Mental Well-being Scale  
55  
56 19 (WEMWBS): Validated for teenage school students in England and Scotland. A mixed  
57  
58 20 methods assessment. *BMC Public Health* 2011;11:487.  
59  
60

- 1  
2  
3 1 33. Zigmond AS, Snaith RP. The Hospital Anxiety and Depression Scale. *Acta Psychiatr*  
4  
5 2 *Scand* 1983;67:361-70.  
6  
7  
8  
9  
10 3 34. Braun V, Clarke V. Using thematic analysis in psychology. *Qual Res Psychol* 2006;3:77-  
11  
12 4 101.  
13  
14  
15  
16 5 35. Flodgren G, Goncalves BDC, Summerbell CD. Interventions to change the behaviour of  
17  
18 6 health professionals and the organisation of care to promote weight reduction in children  
19  
20 and adults with overweight or obesity. *Cochrane Database of Syst Rev*  
21 7  
22 2017;11:CD000984.  
23 8  
24  
25  
26  
27 9 36. Phelan SM, Burgess DJ, Yeazel MW, *et al*. Impact of weight bias and stigma on quality  
28  
29 10 of care and outcomes for patients with obesity. *Obes Rev* 2015;16:319-26.  
30  
31  
32  
33  
34 11 37. Logue J, Allardice G, Gillies M, *et al*. Outcomes of a specialist weight management  
35  
36 12 programme in the UK National Health Service: prospective study of 1838 patients. *BMJ*  
37  
38 13 *Open* 2014;4:e003747.  
39  
40  
41  
42  
43 14 38. Lebrun LA, Chowdhury J, Sripipatana A, *et al*. Overweight/obesity and weight-related  
44  
45 15 treatment among patients in U.S. federally supported health centers. *Obes Res Clin Pract*  
46  
47 16 2013;7:e377-e90.  
48  
49  
50  
51  
52 17 39. Ahern AL, Aveyard P, Boyland EJ, *et al*. Inequalities in the uptake of weight  
53  
54 18 management interventions in a pragmatic trial: an observational study in primary care. *Br*  
55  
56 19 *J Gen Pract* 2016;66(645):e258-63.  
57  
58  
59  
60



- 1  
2  
3 1 40. Adams J, Mytton O, White M, *et al.* Why Are Some Population Interventions for Diet  
4  
5 2 and Obesity More Equitable and Effective Than Others? The Role of Individual Agency.  
6  
7 3 *PLoS Med* 2016;13(4).  
8  
9  
10  
11  
12 4 41. Mastellos N, Gunn LH, Felix LM, *et al.* Transtheoretical model stages of change for  
13  
14 5 dietary and physical exercise modification in weight loss management for overweight and  
15  
16 6 obese adults. *Cochrane Database Syst Rev* 2014;2:CD008066  
17  
18  
19  
20  
21 7 42. Garrow JS, Summerbell CD. Meta-analysis: effect of exercise, with or without dieting, on  
22  
23 8 the body composition of overweight subjects. *Eur J Clin Nutr* 1995;49:1-10.  
24  
25  
26  
27  
28 9 43. Puhan MA, Frey M, Buchi S *et al.* The minimal important difference of the hospital  
29  
30 10 anxiety and depression scale in patients with chronic obstructive pulmonary disease.  
31  
32 11 Health and Quality of Life Outcomes 2008;6:46:10.1186/1477-7525-6-46  
33  
34  
35  
36  
37 12 44. Wright F, Boyle S, Baxter K, *et al.* Understanding the relationship between weight loss,  
38  
39 13 emotional well-being and health-related quality of life in patients attending a specialist  
40  
41 14 obesity weight management service. *J Health Psychol* 2013;18:574-86.  
42  
43  
44  
45  
46 15 45. Somerville R, McKenzie K, Eslami S, *et al.* Poor mental health in severely obese patients  
47  
48 16 is not explained by the presence of comorbidities. *Clin Obes* 2014;5:12-21.  
49  
50  
51  
52 17 46. Madigan CD, Daley AJ, Lewis AL, *et al.* Which weight-loss programmes are as effective  
53  
54 18 as Weight Watchers®? *Brit J Gen Pract* 2014;64(620):e128-e136.  
55  
56  
57  
58  
59  
60

- 1  
2  
3 1 47. Curtis S, Oven K, Wistow J, *et al.* Adaptation to extreme weather events in complex  
4  
5 2 health and social care systems: The example of older people's services in England.  
6  
7 3 *Environ Plann C: Politics and Space* 2018;36:67-91.  
8  
9  
10  
11  
12 4 48. Milat AJ, King L, Newson R, *et al.* Increasing the scale and adoption of population health  
13  
14 5 interventions: experiences and perspectives of policy makers, practitioners, and  
15  
16 6 researchers. *Health Res Policy and Systems* 2014;12:18.  
17  
18  
19  
20  
21 7 49. Jebb S. *Dusting off Foresight's obesity report*. Foresight Blog UK: Government Office  
22  
23 8 for Science, 2017. [https://foresightprojects.blog.gov.uk/2017/10/04/dusting-off-](https://foresightprojects.blog.gov.uk/2017/10/04/dusting-off-foresights-obesity-report/)  
24  
25 9 [foresights-obesity-report/](https://foresightprojects.blog.gov.uk/2017/10/04/dusting-off-foresights-obesity-report/). (Accessed 01 Feb 2019)  
26  
27  
28  
29  
30 10 50. Wolfenden L, Goldman S, Stacey FG *et al.* Strategies to improve the implementation of  
31  
32 11 workplace-based policies or practices targeting tobacco, alcohol, diet, physical activity  
33  
34 12 and obesity. *Cochrane Database of Syst Rev* 2018;11:CD012439.  
35  
36  
37  
38  
39  
40  
41  
42  
43  
44  
45  
46  
47  
48  
49  
50  
51  
52  
53  
54  
55  
56  
57  
58  
59  
60

**SUPPLEMENTARY FILE 1. Momenta session content**

| <b>Week</b>                    | <b>Key topic</b>                                                                                                                                                          | <b>Week</b>    | <b>Key topic</b>                                                                                                                            |
|--------------------------------|---------------------------------------------------------------------------------------------------------------------------------------------------------------------------|----------------|---------------------------------------------------------------------------------------------------------------------------------------------|
| <b>Getting started session</b> | Motivation for weight loss<br>Weight loss goals<br>Differences from other weight management programmes<br>Monitoring                                                      |                |                                                                                                                                             |
| <b>Week 1</b>                  | <b>Snacking</b><br>Fatty, sugary snacks<br>Calories from snacking<br>Healthy snack choices<br>Healthy eating patterns                                                     | <b>Week 7</b>  | <b>Fats</b><br>Reducing fat<br>Different types of fat<br>Lower-fat cooking techniques<br>Hidden fats                                        |
| <b>Week 2</b>                  | <b>Heart rate</b><br>Cardiovascular exercise and health<br>Cardiovascular exercise and weight management<br>Recommended amounts of CV activity<br>Heart rate and exercise | <b>Week 8</b>  | <b>Internal triggers</b><br>Introduction to internal triggers<br>Identifying internal triggers<br>Managing internal triggers                |
| <b>Week 3</b>                  | <b>Food as fuel</b><br>A balanced diet and health<br>Planning meals<br>Fibre                                                                                              | <b>Week 9</b>  | <b>Active lifestyles</b><br>Physical activity and health<br>Physical activity and weight management<br>Different types of physical activity |
| <b>Week 4</b>                  | <b>External triggers</b><br>Introduction to external triggers<br>External triggers and over-eating<br>Managing triggers                                                   | <b>Week 10</b> | <b>Meals</b><br>Positive meal environment<br>Shopping<br>Food labels                                                                        |
| <b>Week 5</b>                  | <b>Strength</b><br>Resistance activity and health<br>Resistance activity and weight management                                                                            | <b>Week 11</b> | <b>Sugars</b><br>Sugary foods and drinks and weight loss<br>Alcohol<br>Added sugars<br>Sugary drinks and appetite regulation                |
| <b>Week 6</b>                  | <b>Breakfast</b><br>Eating breakfast<br>Retraining appetite<br>Barriers to eating breakfast<br>Developing new breakfast habits<br>Beyond marketing                        | <b>Week 12</b> | <b>Eating out</b><br>Challenges when eating away from home<br>Management and coping strategies<br>Moving forwards                           |

**SUPPLEMENTARY FILE 2.****Healthcare professionals' semi-structured interview guide**

*Semi Structured Interview Set the interviewee at ease; explain purpose of the interview; offer a better understanding of what the referral process requires to aid tier 2 weight management to be delivered in Northumberland; explanation about how the interview will be recorded; reaffirmation of consent; and how the information will be analysed and stored; rules of confidentiality / anonymity etc.*

**Questions:**

1. Thinking about raising the weight issue, tell me about your experience of discussing weight with patients.

*Prompts*

- *How does it feel to raise weight as an issue?*
- *Are patients open to discussing weight problems?*
- *Do you find a difference between genders when discussing weight?*
- *What helps you, such as the NHS Health Check Programme, to raise the issue of weight?*
- *What else would help to raise the issue or weight in appointments?*

2. Greater retention is often achieved when patients are ready to change, tell me how you work with / assess patient's readiness to change.

*Prompts*

- *Have you had training around the cycle of change?*
- *Do you use any specific tools or resources to assess the patient?*
- *What would help you to assess the patient's readiness to change?*

- 1  
2  
3  
4  
5  
6  
7  
8  
9  
10  
11  
12  
13  
14  
15  
16  
17  
18  
19  
20  
21  
22  
23  
24
3. Thinking the information and resources available to you during the referral, do you feel you had enough information and resources to encourage patient take up of the programme?

25  
26  
27  
28  
29

*Prompts*

- 30  
31  
32  
33  
34  
35  
36  
37  
38  
39  
40  
41  
42  
43  
44  
45  
46  
47
- *Did you have enough background information?*
  - *Were the referral forms suitable / capture all the information required?*
  - *Were the patient leaflets / resources suitable?*
  - *Were there questions or issues raised that couldn't be answered?*
  - *Was the process easy to use?*
  - *What else could help you to make referrals to weight management programmes?*

- 48  
49  
50  
51  
52  
53  
54  
55  
56  
57  
58  
59  
60
4. Thinking about after you referred the patient, what happened next? (excluded after pilot)

*Prompts*

- *Did you get feedback from the weight management programme on the progress of your patient?*
- *Did your patients achieve weight loss?*
- *Did your patient come back and talk about their experience?*

5. What things are most likely to prevent you from making the referral a weight management programme, either commercial or Public Health funded?

*Prompts*

- *Are there barriers that you perceive, such as cost to the patient?*
- *Are you concerned with raising the weight issue?*
- *Is it a time factor if the patient has an appointment for anything other than a weight issue?*
- *What would help you to overcome the barriers that prevent you from making the referral?*

- 1  
2  
3  
4  
5  
6  
7
6. Is there anything else that you would like to tell me about your expectations and experiences of the weight management programme?

8  
9

## Focus Group Topic Guide

10  
11  
12  
13  
14  
15  
16  
17  
18  
19  
20  
21  
22  
23  
24  
25  
26  
27  
28

*Set group at ease; explain purpose of the focus group; offer a better understanding of what works for people in terms of tier 2 weight management and what doesn't, aiding development of an effective programme for Northumberland residents; explanation about how the focus group will be recorded; reaffirmation of consent; and how the information will be analysed and stored; rules of confidentiality / anonymity etc.*

- 29  
30  
31
1. Tell me a bit about what sort of weight management activity you have taken part in, in the past.

32  
33

*Prompts*

- 34  
35  
36  
37  
38  
39  
40  
41  
42  
43
- *What influence have others had on your weight management?*
  - *Do you have any particular likes/dislikes of physical activity/managing weight/nutrition*
  - *Has there been anything else that has influenced your management of weight?*

- 44  
45  
46  
47  
48
2. So thinking about the weight management programme you have undertaken, how did you find out about it?

49  
50

*Prompts*

- 51  
52  
53  
54  
55  
56  
57  
58  
59  
60
- *Who / what motivated you to attend?*
  - *What made you decide that this is the right time to look at managing your weight?*
  - *Did the time of year make a difference?*

1  
2  
3 3. Thinking about your experience of when you were referred to the weight management programme,  
4  
5 how did you find the process?  
6

7  
8  
9  
10  
11  
12  
13  
14  
15  
16  
17  
18  
19  
20  
21  
22  
23  
24  
25  
26  
27  
28  
29  
30  
31  
32  
33  
34  
35  
36  
37  
38  
39  
40  
41  
42  
43  
44  
45  
46  
47  
48  
49  
50  
51  
52  
53  
54  
55  
56  
57  
58  
59  
60

*Prompts*

- *What type of health professional referred you? (GP / Practice Nurse)*
- *Did you specifically attend Primary Care to discuss your weight?*
- *How was weight raised?*
- *What did the referrer explain to you about the programme? Did you get enough information?*
- *How long was it from your referral from Primary Care to the first assessment in the weight management programme; was this what you expected? Were you still motivated?*

4. How did you feel about being referred?

- *Prompts*
- *How confident did you feel about taking part in the programme?*
- *Was there anything that you were particularly looking forward to?*
- *Was there anything that you were worried about?*

5. What did you hope to achieve by taking part in the weight management programme?

*Prompts*

- *What were your expectations when you start attending the scheme?*
- *Have there been changes to your health that you expected happen as a result of participation?*
- *How quickly did you expect to see these changes? And did this happen?*

6. Thinking about after you were referred, what happened next?

*Prompts*

- 1 • *How long after referral did it take to be contacted by the Active Northumberland?*
- 2
- 3 • *What information did you receive prior to the initial consultation?*
- 4
- 5 • *How comfortable did you feel coming to the initial consultation?*
- 6
- 7
- 8
- 9

10 7. What influenced you most to attend the weight management programme?

11  
12  
13 *Prompts*

- 14
- 15 • *What did you expect from the staff?*
- 16
- 17
- 18 • *How important to you were changes in health or weight?*
- 19
- 20
- 21 • *Why were the influences raised important?*
- 22
- 23
- 24
- 25

26 8. What things were most likely to prevent you from attending the programme?

27  
28  
29 *Prompts*

- 30 • *Tell me about any worries you might have had about health issues.*
- 31
- 32
- 33 • *Tell me about any other things, such as other commitments, that might have stopped you from*
- 34 *attending*
- 35
- 36
- 37
- 38 • *Did any of these issues arise? How did you overcome these issues?*
- 39
- 40
- 41
- 42

43 9. Now that you have completed the programme, tell me how did you felt about undertaking the weight  
44 management programme?

45  
46  
47  
48 *Prompts*

- 49
- 50 ○ *Did you achieve the health / weight outcomes you expected?*
- 51
- 52
- 53 ○ *Why do you think it worked or not for you?*
- 54
- 55
- 56 ○ *Do you feel you now have the tools to continue to make positive lifestyle choices?*
- 57
- 58 ○ *Is there something that will prevent you to continue to make positive lifestyle choices?*
- 59
- 60



10. Is there anything else that you would like to tell me about your expectations and experiences  
of the weight management programme?

For peer review only

1  
2  
3  
4  
5  
6  
7  
8  
9  
10  
11  
12  
13  
14  
15  
16  
17  
18  
19  
20  
21  
22  
23  
24  
25  
26  
27  
28  
29  
30  
31  
32  
33  
34  
35  
36  
37  
38  
39  
40  
41  
42  
43  
44  
45  
46  
47  
48  
49  
50  
51  
52  
53  
54  
55  
56  
57  
58  
59  
60

**COREQ GUIDELINES REPORTING CHECKLIST: Prototyping for public health in a local context: a streamlined evaluation of a community-based weight management programme (Momenta), Northumberland, UK**

| No                                             | Item                                     | Guide questions/description                                                                                                                      | Information                                                                                                                                                                                                                                          | Reported in manuscript (Section, page no.)   |
|------------------------------------------------|------------------------------------------|--------------------------------------------------------------------------------------------------------------------------------------------------|------------------------------------------------------------------------------------------------------------------------------------------------------------------------------------------------------------------------------------------------------|----------------------------------------------|
| <b>Domain 1: Research team and reflexivity</b> |                                          |                                                                                                                                                  |                                                                                                                                                                                                                                                      |                                              |
| Personal Characteristics                       |                                          |                                                                                                                                                  |                                                                                                                                                                                                                                                      |                                              |
| 1                                              | Interviewer/facilitator:                 | Which author/s conducted the interview or focus group?                                                                                           | LN                                                                                                                                                                                                                                                   | Qualitative evaluation component, page 10    |
| 2                                              | Credentials                              | What were the researcher's credentials?                                                                                                          | LN: part of her Public Health Masters degree                                                                                                                                                                                                         | Qualitative evaluation component, page 10    |
| 3                                              | Occupation                               | What was their occupation at the time of the study?                                                                                              | LN: Masters student and employed as a member of the Northumberland public health team at the time of the evaluation.                                                                                                                                 | Qualitative evaluation component, page 10    |
| 4                                              | Gender                                   | Was the researcher male or female?                                                                                                               | Female (referred to as her)                                                                                                                                                                                                                          | Qualitative evaluation component, page 10    |
| 5                                              | Experience and training                  | What experience or training did the researcher have?                                                                                             | LN: Masters in Public Health (which contained qualitative methods training), mentored by TF, an experienced qualitative researcher.                                                                                                                  | Qualitative evaluation component, page 10    |
| Relationship with participants                 |                                          |                                                                                                                                                  |                                                                                                                                                                                                                                                      |                                              |
| 6                                              | Relationship established                 | Was a relationship established prior to study commencement?                                                                                      | No. Practice managers from all six referring surgeries were sent an invitation for staff to take part.                                                                                                                                               | Qualitative evaluation component, page 10    |
| 7                                              | Participant knowledge of the interviewer | What did the participants know about the researcher? <i>e.g. personal goals, reasons for doing the research</i>                                  | LN informed HCP participants about her employment status and that the study aimed to understand implementation issues.<br><br>Programme participants were invited to participate in a series of focus groups at programme-end to explore experiences | Qualitative evaluation component, page 10-11 |
| 8                                              | Interviewer characteristics              | What characteristics were reported about the interviewer/facilitator? <i>e.g. Bias, assumptions, reasons and interests in the research topic</i> | Not discussed                                                                                                                                                                                                                                        | N/A                                          |

| <b>Domain 1: Study design</b> |                                       |                                                                                                                                                                 |                                                                                                                                                                                                                                                                         |                                                                                             |
|-------------------------------|---------------------------------------|-----------------------------------------------------------------------------------------------------------------------------------------------------------------|-------------------------------------------------------------------------------------------------------------------------------------------------------------------------------------------------------------------------------------------------------------------------|---------------------------------------------------------------------------------------------|
| Theoretical framework         |                                       |                                                                                                                                                                 |                                                                                                                                                                                                                                                                         |                                                                                             |
| 9                             | Methodological orientation and Theory | What methodological orientation was stated to underpin the study? <i>e.g. grounded theory, discourse analysis, ethnography, phenomenology, content analysis</i> | Qualitative data were audio-recorded and transcribed by LN using a thematic process                                                                                                                                                                                     | Data analysis, page 12                                                                      |
| Participant selection         |                                       |                                                                                                                                                                 |                                                                                                                                                                                                                                                                         |                                                                                             |
| 10                            | Sampling                              | How were participants selected? <i>e.g. purposive, convenience, consecutive, snowball</i>                                                                       | All HCPs involved were invited: Practice managers from all six referring surgeries were sent an invitation for staff to take part<br><br>Programme participants: for the first wave of referrals, all (n = 39) were invited to participate in a series of focus groups. | Qualitative evaluation component, page 10-11                                                |
| 11                            | Method of approach                    | How were participants approached? <i>e.g. face-to-face, telephone, mail, email</i>                                                                              | HCPs: by email<br><br>Programme participants: written information handed out during the first session                                                                                                                                                                   | Qualitative evaluation component, page 10-11                                                |
| 12                            | Sample size                           | How many participants were in the study?                                                                                                                        | 5 HCPs<br>13 Intervention participants                                                                                                                                                                                                                                  | Results, page 18<br>Results, page 18                                                        |
| 13                            | Non-participation                     | How many people refused to participate or dropped out? Reasons?                                                                                                 | HCPs: 84 invited, 5 participated.<br><br>Programme participants: 39 invited, 13 participated<br>Reasons for refusal not documented                                                                                                                                      | Qualitative evaluation component, page 10-11<br>and<br>Results, page 15<br>Results, page 18 |
| Setting                       |                                       |                                                                                                                                                                 |                                                                                                                                                                                                                                                                         |                                                                                             |
| 14                            | Setting of data collection            | Where was the data collected? <i>e.g. home, clinic, workplace</i>                                                                                               | HCPs: in referring surgeries<br><br>Programme participants: in the leisure centres                                                                                                                                                                                      | Results, page 15<br><br>Results, page 18                                                    |
| 15                            | Presence of non-participants          | Was anyone else present besides the participants and researchers?                                                                                               | Not stated                                                                                                                                                                                                                                                              | N/A                                                                                         |
| 16                            | Description of sample                 | What are the important characteristics of the                                                                                                                   | HCPs: role reported                                                                                                                                                                                                                                                     | Results, page 15<br>Results, page 18                                                        |

|    |                                        |                                                                               |                                                                                                                                                |                                                                                            |
|----|----------------------------------------|-------------------------------------------------------------------------------|------------------------------------------------------------------------------------------------------------------------------------------------|--------------------------------------------------------------------------------------------|
|    |                                        | sample? <i>e.g. demographic data, date</i>                                    | Programme participants: programme group and weight loss status reported<br><br>Date range for interviews reported                              | Qualitative evaluation component, page 10                                                  |
|    | Data collection                        |                                                                               |                                                                                                                                                |                                                                                            |
| 17 | Interview guide                        | Were questions, prompts, guides provided by the authors? Was it pilot tested? | Semi-structured interview guide used. Pilot tested.<br><br>Guides provided as supplementary file                                               | Qualitative evaluation component, page 10-11<br><br>Supplementary file 2                   |
| 18 | Repeat interviews                      | Were repeat interviews carried out? If yes, how many?                         | No not applicable to study design                                                                                                              | N/A                                                                                        |
| 19 | Audio/visual recording                 | Did the research use audio or visual recording to collect the data?           | Yes, the interviews were audio recorded                                                                                                        | Data analysis, page 12                                                                     |
| 20 | Field notes                            | Were field notes made during and/or after the interview or focus group?       | Notes taken from focus groups helped to contextualise developing themes                                                                        | Data analysis, page 12                                                                     |
| 21 | Duration                               | What was the duration of the interviews or focus groups?                      | HCPs average length reported: 26 minutes<br><br>Programme participants: range reported: 26-44 minutes                                          | Qualitative evaluation component, page 10<br><br>Qualitative evaluation component, page 11 |
| 22 | Data saturation                        | Was data saturation discussed?                                                | No                                                                                                                                             | N/A                                                                                        |
| 23 | Transcripts returned                   | Were transcripts returned to participants for comment and/or correction?      | No                                                                                                                                             | N/A                                                                                        |
|    | <b>Domain 3: analysis and findings</b> |                                                                               |                                                                                                                                                |                                                                                            |
|    | Data analysis                          |                                                                               |                                                                                                                                                |                                                                                            |
| 24 | Number of data coders                  | How many data coders coded the data?                                          | N=2 (LN and TF)                                                                                                                                | Data analysis, page 12                                                                     |
| 25 | Description of the coding tree         | Did authors provide a description of the coding tree?                         | Yes key themes described at beginning of HCP qualitative results section and at beginning of programme participant qualitative results section | Results, page 15<br><br>Results, page 18                                                   |
| 26 | Derivation of themes                   | Were themes identified in advance or derived from the data?                   | Identified from data                                                                                                                           | Data analysis, page 12                                                                     |

|           |                              |                                                                                                                                   |                                                                                             |                     |
|-----------|------------------------------|-----------------------------------------------------------------------------------------------------------------------------------|---------------------------------------------------------------------------------------------|---------------------|
| 27        | Software                     | What software, if applicable, was used to manage the data?                                                                        | Not stated                                                                                  | N/A                 |
| 28        | Participant checking         | Did participants provide feedback on the findings?                                                                                | No                                                                                          | N/A                 |
| Reporting |                              |                                                                                                                                   |                                                                                             |                     |
| 29        | Quotations presented         | Were participant quotations presented to illustrate the themes / findings? Was each quotation identified? e.g. participant number | Yes, participants identified using a participant label                                      | Results, page 15-19 |
| 30        | Data and findings consistent | Was there consistency between the data presented and the findings?                                                                | Themes were illustrated by participant quotations                                           | Results, page 15-19 |
| 31        | Clarity of major themes      | Were major themes clearly presented in the findings?                                                                              | Themes identified and presented under sub headings for both HCPs and programme participants | Results, page 15-19 |
| 32        | Clarity of minor themes      | Is there a description of diverse cases or discussion of minor themes?                                                            | For HCPs minor themes highlighted under additional barriers to engagement                   | Results, page 17    |
