# Supplementary material for: Prototyping for public health in a local context: a streamlined evaluation of a community-based weight management programme (Momenta), Northumberland, UK
Source: PubMed Central journal article supplement (PMC6830698; doi:10.1136/bmjopen-2019-029718), 2019-10-31
Supplement: bmjopen-2019-029718supp001.pdf [file bmjopen-2019-029718supp001.pdf]

**SUPPLEMENTARY FILE 1. Momenta session content**

| <b>Week</b>                    | <b>Key topic</b>                                                                                                                                                          | <b>Key topic</b>                                                                                                                                             |
|--------------------------------|---------------------------------------------------------------------------------------------------------------------------------------------------------------------------|--------------------------------------------------------------------------------------------------------------------------------------------------------------|
| <b>Getting started session</b> | Motivation for weight loss<br>Weight loss goals<br>Differences from other weight management programmes<br>Monitoring                                                      |                                                                                                                                                              |
| <b>Week 1</b>                  | <b>Snacking</b><br>Fatty, sugary snacks<br>Calories from snacking<br>Healthy snack choices<br>Healthy eating patterns                                                     | <b>Week 7</b><br><b>Fats</b><br>Reducing fat<br>Different types of fat<br>Lower-fat cooking techniques<br>Hidden fats                                        |
| <b>Week 2</b>                  | <b>Heart rate</b><br>Cardiovascular exercise and health<br>Cardiovascular exercise and weight management<br>Recommended amounts of CV activity<br>Heart rate and exercise | <b>Week 8</b><br><b>Internal triggers</b><br>Introduction to internal triggers<br>Identifying internal triggers<br>Managing internal triggers                |
| <b>Week 3</b>                  | <b>Food as fuel</b><br>A balanced diet and health<br>Planning meals<br>Fibre                                                                                              | <b>Week 9</b><br><b>Active lifestyles</b><br>Physical activity and health<br>Physical activity and weight management<br>Different types of physical activity |
| <b>Week 4</b>                  | <b>External triggers</b><br>Introduction to external triggers<br>External triggers and over-eating<br>Managing triggers                                                   | <b>Week 10</b><br><b>Meals</b><br>Positive meal environment<br>Shopping<br>Food labels                                                                       |
| <b>Week 5</b>                  | <b>Strength</b><br>Resistance activity and health<br>Resistance activity and weight management                                                                            | <b>Week 11</b><br><b>Sugars</b><br>Sugary foods and drinks and weight loss<br>Alcohol<br>Added sugars<br>Sugary drinks and appetite regulation               |
| <b>Week 6</b>                  | <b>Breakfast</b><br>Eating breakfast<br>Retraining appetite<br>Barriers to eating breakfast<br>Developing new breakfast habits<br>Beyond marketing                        | <b>Week 12</b><br><b>Eating out</b><br>Challenges when eating away from home<br>Management and coping strategies<br>Moving forwards                          |
